# Supplementary material
Source: publisher figshare collection journal article supplement (https://tandf.figshare.com/articles/dataset/_/5726008)
Supplement: Supplementary file 1 [file 1]

# Colenso's *Glossarium Botanicum Novae Zelandiae* and Cunningham's *Florae Insularum Novae Zelandiae Precursor*: numbering, and concordance between historic and current botanical names

---

## Clem Earp

The tables in this document are an attempt to supply a concordance between botanical names in current use and the historic specific names in both the checklist portion of William Colenso's *Glossarium Botanicum: Novae Zelandiae* and Allan Cunningham's *Florae Insularum Novae Zelandiae Precursor*. By 'current use' is meant that the names are accepted in the Flora of New Zealand Online (Breitwieser et al. 2016, hereafter FNZO) for vascular plants, in the online database Ngā Tipu o Aotearoa (Allan Herbarium 2016, hereafter NTA) for bryophytes, in Algaebase (Guiry & Guiry 2016, hereafter AB) for seaweeds, and in the lichen volumes of the *Flora of New Zealand* (Galloway 1985, 2007).

In the first table, only those names in the classes covered by both the *Glossarium* and *Precursor* are treated, i.e. vascular plants and bryophytes. The entries are in the same order of appearance as in the *Glossarium*, and their ordinal numbers in the *Precursor* are given where applicable. In the second table those classes which appear only in the *Precursor* are covered, i.e. seaweeds and lichens.

In the first table, where a blank appears in the column for *Glossarium* numbers (headed **G #**), it should be assumed that these entries were present but not numbered by Colenso; but if a blank appears in the column for *Precursor* numbers (headed **P #**), it should be assumed that the entry does not appear at all in the *Precursor*. Three entries that were omitted from the printed text of the *Precursor* by typographic errors (a seaweed at no. 30, and mosses at nos 98 and 99) are restored here from Cunningham's manuscript. A number of other irregularities will be seen in the numbering of the *Precursor*, due to typographic errors in the printed text.

When the historic name is given in a synonymy within the current work of reference, the concordance is simple. However, when the historic name does not appear in the current synonymy (and, for example, FNZO does not list all the synonyms given by Allan 1961), more than one authority is given, with the leftmost containing the historic name and the rightmost the current name, in a chain linked by common synonyms.

Where no reference is cited, it should be assumed that my own opinion is involved. In a few cases I have put 'auctt.' where this is my opinion based on too many other works to cite.

This document should not be taken as definitive. Because of the state of knowledge of New Zealand botany at the time Colenso constructed his checklist, some species cannot be identified with absolute certainty without further research, or perhaps, not even then. This is particularly the case for seaweeds and lichens, where the earliest botanists attributed cosmopolitan species to New Zealand, which later systematists – even near contemporaries like the Hookers and their co-workers – found difficult when the time came for better discrimination. In addition, nomenclature is always subject to change, particularly in those two classes.

Species marked with an asterisk \* are exotic; those marked with † were mistakenly attributed to New Zealand.

|                                                                             |    |
|-----------------------------------------------------------------------------|----|
| Table 1: Classes covered by both <i>Glossarium</i> & <i>Precursor</i> ..... | 5  |
| Table 2: Classes covered by <i>Precursor</i> only .....                     | 24 |

## References

- Allan Herbarium 2016. Ngā Tipu o Aotearoa – New Zealand Plant Names Database. Landcare Research, New Zealand. Accessed at <http://nzflora.landcareresearch.co.nz>, 28 Dec 2016.
- Allan HH 1961. Flora of New Zealand. Vol. I. Indigenous Tracheophyta. Psilopsida, Lycopsida, Filicopsida, Gymnospermae, Dicotyledones. Government Printer, Wellington.
- Beccari O 1916. On a new South Polynesian Palm, with notes on the genus *Rhopalostylis* Wendl. et Drude. Transactions of the New Zealand Institute 49:47–50.
- Beever JE, Allison KW, Child J 1992. The Mosses of New Zealand. Edition 2. University of Otago Press, Dunedin.
- Breitwieser I, Brownsey PJ, Nelson WA, Wilton AD (eds) 2016. Flora of New Zealand Online. Accessed at [www.nzflora.info](http://www.nzflora.info), 20 Dec 2016.
- Briggs BG, Johnson LAS 1968. The status and relationships of the Australasian species of *Typha*. Contributions from the New South Wales National Herbarium 4:57–69.
- Brownsey PJ, Chinnock RJ 1984. A taxonomic revision of the New Zealand species of *Hypolepis*. New Zealand Journal of Botany 22:43–80.
- Cheeseman TF 1906. Manual of the New Zealand Flora. Wellington: Govt Printer. 1199p.
- Chinnock RJ 1975. The New Zealand species of *Tmesipteris* (Psilotaceae). New Zealand Journal of Botany 13:743–768.
- D’Archino R, Nelson W, Yang MY, Kim MS 2015. New record of *Hypnea flexicaulis* in New Zealand and description of *Calliblepharis psammophilus* sp. nov. Botanica Marina 58:485–497.
- Drury DG 1972. The cluster and solitary-headed cudweeds native to New Zealand: (Gnaphalium Section Euchiton–Compositae). New Zealand Journal of Botany 10:112–179.
- Edgar E, Connor HE 2000. Flora of New Zealand. Vol. V. Gramineae. Manaaki Whenua Press, Lincoln.
- Engel JJ, Glenney D 2008. A Flora of the Liverworts and Hornworts of New Zealand. Volume 1. Missouri Botanical Garden Press, St. Louis.
- Fife AJ 1996. A synopsis of New Zealand *Sphagna*, with a description of *S. simplex* sp. nov. New Zealand Journal of Botany 34:309–328.
- Fosberg FR 1993. The Forster Pacific Islands collections from Captain Cook’s Resolution voyage. Allertonia 7:71–86.
- Galloway DJ 1985. Flora Of New Zealand. Lichens. Government Printer, Wellington.
- Galloway DJ 2007. Flora of New Zealand. Lichens, including lichen-forming and lichenicolous fungi [revised second edition in two volumes]. Manaaki Whenua Press, Lincoln.

- Gillis WT, Proctor GR 1974. *Caesalpinia* subgenus *Guilandina* in the Bahamas. *Journal of the Arnold Arboretum* 55:425–430.
- Guiry MD, Guiry GM 2016. Algaebase. National University of Ireland, Galway. Accessed at <http://www.algaebase.org>, 28 Dec 2016.
- Healy AJ, Edgar E 1980. *Flora of New Zealand*. Vol. III. Adventive Cyperaceous, Petalous & Spathaceous Monocotyledons. Government Printer, Wellington.
- Hodgson EA 1942. Review of the New Zealand Species of *Schistochila*, with notes on Colenso's Species. *Transactions of the Royal Society of New Zealand* 71:181–194.
- Hodgson EA 1943. A Review of the New Zealand Species of *Plagiochila*. Being the third of a series of papers on New Zealand Hepaticae (Liverworts). *Transactions of the Royal Society of New Zealand* 73:270–296.
- Hodgson EA 1957. New Zealand Hepaticae (Liverworts)—X. Marsupial Genera of New Zealand With Amendments and Additions to Paper V (Jungermanniaceae) (1946). *Transactions of the Royal Society of New Zealand* 85:565–584.
- Hodgson EA 1959. New Zealand Hepaticae (Liverworts) - XI. A review of the New Zealand species of the genus *Lepidolaena*. *Transactions of the Royal Society of New Zealand* 87:199–210
- Hooker JD 1844. Catalogue of the names of a collection of plants made by Mr. Wm. Stephenson in New Zealand. *London Journal of Botany* 3:411–418.
- Hooker JD 1852–1853. The Botany of the Antarctic Voyage of H.M. Discovery Ships Erebus and Terror in the Years 1839–1843: Under the Command of Captain Sir James Clark Ross. II. *Flora Novae-Zelandiae*. Part I. Flowering Plants. Lovell Reeve: London. xxxix+312 p+70 pl.
- Hooker JD 1854–1855. The Botany of the Antarctic Voyage of H.M. Discovery Ships Erebus and Terror in the Years 1839–1843: Under the Command of Captain Sir James Clark Ross. II. *Flora Novae-Zelandiae*. Part II. Flowerless Plants. Lovell Reeve: London. 378 p+68 pl.
- Hooker JD 1864. *Handbook of the New Zealand Flora*. Part I. London: Reeve. 392p.
- Hooker JD 1867. *Handbook of the New Zealand Flora*. Part II. London: Reeve. 406p.
- Hooker JD, Harvey WH 1845. *Algae Novae Zelandiae*. *London Journal of Botany* 4:521–551.
- Johnson LAS, Wilson KL 2000. *Juncus edgariae* – a new species from New Zealand. *Telopea* 9:399–402.
- Martin W 1959. The Lichen genus *Cladonia*, subsection *Cladina*, in New Zealand. *Transactions of the Royal Society of New Zealand* 88:169–175.
- Moore LB 1944. The genus *Pterocladia* in New Zealand. *Transactions of the Royal Society of New Zealand* 74:332–342.
- Moore LB, Edgar E 1970. *Flora of New Zealand*. Vol. II. Indigenous Tracheophyta. Monocotyledones except Gramineae. Government Printer, Wellington.
- Orchard AE 1975: Taxonomic Revisions in the Family Haloragaceae. I. The Genera *Haloragis*,

*Haloragodendron*, *Glischrocaryon*, *Meziella* and *Gonocarpus*. Bulletin of the Auckland Institute and Museum 10:1–299.

Parris BS 1972. The genus *Doodia* R.Br. (Blechnaceae:Filicales) in New Zealand. New Zealand Journal of Botany 10:585–604.

Parris BS 1980. Further notes on *Doodia*, *Grammitis*, and *Blechnum* (Filicales). New Zealand Journal of Botany 18:145–147.

Perrie LR, Parris BS 2012. Chloroplast DNA sequences indicate the grammitid ferns (Polypodiaceae) in New Zealand belong to a single clade, *Notogrammitis* gen. nov. New Zealand Journal of Botany 50: 457–472.

Petterson JA 1997. Revision of the genus *Wahlenbergia* (Campanulaceae) in New Zealand. New Zealand Journal of Botany 35:9–54.

Quirk H, Chambers TC, Regan M 1983. The fern genus *Cheilanthes* in Australia. Australian Journal of Botany 31:501–553.

Telford IRH, Sebastian P, de Lange PJ, Bruhl JJ, Renner SS 2012. Morphological and molecular data reveal three rather than one species of *Sicyos* (Cucurbitaceae) in Australia, New Zealand and Islands of the South West Pacific. Australian Systematic Botany 25:188–201.

Tryon RM, Tryon AF 1982. Ferns and Allied Plants: With Special Reference to Tropical America. Springer-Verlag, New York.

Walpers WG 1845. *Avicennia*. Repertorium Botanices Systematicae 4:131–133.

Webb CJ, Sykes WR, Garnock-Jones PJ, Given DR 1988. Flora of New Zealand. Volume IV, Naturalised pteridophytes, gymnosperms, dicotyledons. DSIR Botany Division, Christchurch.

**Table 1: Classes covered by both *Glossarium* & *Precursor***

| G #   | P # | Historic name                        | Current name                                                                                   | Authority                  |
|-------|-----|--------------------------------------|------------------------------------------------------------------------------------------------|----------------------------|
| 1     | 325 | Dammara Australis                    | <i>Agathis australis</i> (D.Don) Lindl. ex Loudon                                              | FNZO                       |
| 2     | 326 | Phyllocladus trichomanoides          | <i>Phyllocladus trichomanoides</i> G.Benn ex D.Don                                             | FNZO                       |
| 3     | 327 | Podocarpus ferruginea                | <i>Prumnopitys ferruginea</i> (D.Don) de Laub.                                                 | FNZO                       |
| 4     | 328 | Podocarpus [totara]                  | <i>Podocarpus totara</i> D.Don var. <i>totara</i>                                              | FNZO                       |
| 5 & 6 | 329 | Dacrydium [mai]                      | <i>Prumnopitys taxifolia</i> (Sol. ex D.Don) de Laub.                                          | Allan (1961, p. 106); FNZO |
| 7     | 330 | Dacrydium plumosum                   | <i>Libocedrus plumosa</i> (D.Don) Sarg.                                                        | FNZO                       |
| 8     | 331 | Podocarpus excelsus                  | <i>Dacrycarpus dacrydioides</i> (A.Rich.) de Laub.                                             | Allan(1961, p. 106); FNZO  |
| 9     | 332 | Dacrydium cupressinum                | <i>Dacrydium cupressinum</i> Sol. ex G.Forst.                                                  | FNZO                       |
|       |     | [Manoao]                             | <i>Manoao colensoi</i> (Hook.) Molloy                                                          | FNZO                       |
| 10    | 323 | Piper excelsum                       | <i>Piper excelsum</i> G.Forst.                                                                 | FNZO                       |
| 11    | 324 | Peperomia urvilleana ('Urvilliana')  | <i>Peperomia urvilleana</i> A.Rich.                                                            | FNZO                       |
| 12    | 333 | Urtica ferox                         | <i>Urtica ferox</i> G.Forst.                                                                   | FNZO                       |
| 13    | 334 | Urtica debilis                       | <i>Parietaria debilis</i> G.Forst.                                                             | FNZO                       |
| 14    | 335 | Elatostema rugosa ('Elatosemma')     | <i>Elatostema rugosum</i> A.Cunn.                                                              | FNZO                       |
| 15    | 336 | Hedycarya dentata ('Hedycaria')      | <i>Hedycarya arborea</i> J.R.Forst. & G.Forst.                                                 | FNZO                       |
| 16    | 337 | Hedycarya scabra                     | <i>Hedycarya arborea</i> J.R.Forst. & G.Forst.                                                 | Allan (1961, p. 138); FNZO |
| 17    | 338 | Broussonetia papyrifera              | <i>*Broussonetia papyrifera</i> (L.) L'Hér. ex Vent.                                           | FNZO                       |
| 18    | 339 | Euphorbia glauca                     | <i>Euphorbia glauca</i> G.Forst.                                                               | FNZO                       |
| 19    | 340 | Mida salicifolia ('Mira')            | <i>Mida salicifolia</i> A.Cunn. var. <i>salicifolia</i>                                        | FNZO                       |
| 20    | 341 | Mida eucalyptoides ('eucalyptoides') | <i>Mida salicifolia</i> var. <i>salicifolia</i> × <i>M. salicifolia</i> var. <i>myrtifolia</i> | Allan (1961, p. 410)       |
| 21    | 342 | Mida myrtifolia                      | <i>Mida salicifolia</i> A.Cunn. var. <i>myrtifolia</i> (A.Cunn.) Allan                         | FNZO                       |
| 22    | 343 | Pimelea gnidia                       | <i>Pimelea gnidia</i> (J.R.Forst. & G.Forst.) Willd.                                           | FNZO                       |
| 23    | 344 | Pimelea pilosa                       | <i>Pimelea tomentosa</i> (J.R.Forst. & G.Forst.) Druce                                         | FNZO                       |
| 24    | 345 | Pimelea virgata                      | <i>Pimelea tomentosa</i> (J.R.Forst. & G.Forst.) Druce                                         | FNZO                       |
| 25    | 347 | Pimelea arenaria                     | <i>Pimelea villosa</i> Sol. ex Sm. subsp. <i>arenaria</i> (A.Cunn.) C.J.Burrows                | FNZO                       |
| 26    | 346 | Pimelea prostrata                    | <i>Pimelea prostrata</i> (J.R.Forst. & G.Forst.) Willd.                                        | FNZO                       |
| 27    | 348 | Pimelea urvilleana ('Urvilliana')    | <i>Pimelea urvilleana</i> A.Rich. subsp. <i>urvilleana</i>                                     | FNZO                       |
| 28    | 349 | Persoonia Toru ('Personia')          | <i>Toronia toru</i> (A.Cunn.) L.A.S.Johnson & B.G.Briggs                                       | FNZO                       |
| 29    | 350 | Knightia Excelsa                     | <i>Knightia excelsa</i> R.Br.                                                                  | FNZO                       |
| 30    | 351 | Laurus tarairi ('Taraire')           | <i>Beilschmiedia tarairi</i> (A.Cunn.) Benth. & Hook.f. ex Kirk                                | FNZO                       |

| G # | P # | Historic name                            | Current name                                                       | Authority                          |
|-----|-----|------------------------------------------|--------------------------------------------------------------------|------------------------------------|
| 31  | 352 | Laurus Tawa                              | <i>Beilschmiedia tawa</i> (A.Cunn.) Benth. & Hook.f. ex Kirk       | FNZO                               |
| 32  | 353 | Laurus calicaris                         | <i>Litsea calicaris</i> (Sol. ex A.Cunn.) Benth. & Hook.f. ex Kirk | FNZO                               |
|     |     | Laurus Victoriana                        | <i>Beilschmiedia tawa</i> (A.Cunn.) Benth. & Hook.f. ex Kirk       | FNZO                               |
| 33  | 354 | Laurelia Novae Zelandiae                 | <i>Laurelia novae-zelandiae</i> A.Cunn.                            | FNZO                               |
| 34  | 355 | Polygonum Australe                       | <i>Muehlenbeckia australis</i> (G.Forst.) Meisn.                   | FNZO                               |
| 35  | 356 | Polygonum adpressum                      | <i>Muehlenbeckia australis</i> (G.Forst.) Meisn.                   | FNZO                               |
| 36  | 357 | Polygonum complexum                      | <i>Muehlenbeckia complexa</i> (A.Cunn.) Meisn.                     | FNZO                               |
| 37  | 358 | Polygonum prostratum [A.Rich. non R.Br.] | <i>Persicaria decipiens</i> (R.Br.) K.L.Wilson                     | Allan (1961, p. 225); FNZO         |
| 38  | 359 | Rumex crispus                            | * <i>Rumex crispus</i> L.                                          | FNZO                               |
| 39  | 360 | Rumex brownianus ('Brownianus')          | <i>Rumex flexuosus</i> Sol. ex G.Forst.                            | FNZO                               |
| 40  | 361 | Chenopodium triandrum                    | <i>Chenopodium triandrum</i> G.Forst.                              | FNZO                               |
| 41  | 362 | Chenopodium Botrys                       | <i>Dysphania pumilio</i> (R.Br.) Mosyakin & Clemants               | Webb et al. (1988, p. 528); FNZO   |
| 42  | 363 | Chenopodium glaucum                      | <i>Oxybasis glauca</i> subsp. <i>ambigua</i> (R.Br.) Mosyakin      | FNZO                               |
| 43  | 364 | Chenopodium maritimum                    | <i>Suaeda novae-zelandiae</i> Allan                                | Allan (1961, p. 231); FNZO         |
| 44  | 365 | Chenopodium fruticosum                   | <i>Suaeda novae-zelandiae</i> Allan                                | Hooker (1853, p. 213); Allan p.231 |
| 45  | 366 | Salicornia indica                        | <i>Sarcocornia quinqueflora</i> (Bunge ex Ung.-Sternb.) A.J.Scott  | Allan (1961, p. 232); FNZO         |
| 46  | 367 | Alternanthera denticulata                | <i>Alternanthera denticulata</i> R.Br.                             | FNZO                               |
| 47  | 368 | Mniarum biflorum                         | <i>Scleranthus biflorus</i> (J.R.Forst. & G.Forst.) Hook.f.        | FNZO                               |
| 48  | 369 | Plantago major                           | * <i>Plantago major</i> L.                                         | FNZO                               |
| 49  | 370 | Plantago varia                           | <i>Plantago raoulii</i> Decne.                                     | Hooker (1853, p. 208); FNZO        |
| 50  | 371 | Anagallis arvensis                       | * <i>Lysimachia arvensis</i> (L.) U.Manns & Anderb.                | FNZO                               |
| 51  | 372 | Samolus littoralis                       | <i>Samolus repens</i> (J.R.Forst. & G.Forst.) Pers.                | Hooker (1867, p. 736); FNZO        |
| 52  | 373 | Veronica speciosa                        | <i>Veronica speciosa</i> R.Cunn. ex A.Cunn.                        | FNZO                               |
| 53  | 374 | Veronica salicifolia                     | <i>Veronica salicifolia</i> G.Forst.                               | FNZO                               |
| 54  | 376 | Veronica macrocarpa                      | <i>Veronica macrocarpa</i> Vahl                                    | FNZO                               |
| 55  | 375 | Veronica ligustrifolia                   | <i>Veronica ligustrifolia</i> R.Cunn ex A.Cunn.                    | FNZO                               |
| 56  | 377 | Veronica angustifolia                    | <i>Veronica stenophylla</i> Steudel var. <i>stenophylla</i>        | Allan (1961, p. 912); FNZO         |
| 57  | 378 | Veronica parviflora                      | <i>Veronica parviflora</i> Vahl                                    | FNZO                               |
| 58  | 379 | Veronica elliptica                       | <i>Veronica elliptica</i> G.Forst.                                 | FNZO                               |
| 59  | 380 | Veronica catarractae                     | <i>Veronica catarractae</i> G.Forst.                               | FNZO                               |
| 60  | 381 | Veronica diosmifolia                     | <i>Veronica diosmifolia</i> A.Cunn.                                | FNZO                               |



| G # | P # | Historic name                     | Current name                                                         | Authority                    |
|-----|-----|-----------------------------------|----------------------------------------------------------------------|------------------------------|
| 61  | 382 | Veronica calycina                 | <i>Veronica plebeia</i> R.Br.                                        | Hooker (1853, p. 197); FNZO  |
| 62  | 383 | Gratiola sexdentata               | <i>Gratiola sexdentata</i> R.Cunn. ex A.Cunn.                        | FNZO                         |
| 63  | 384 | Euphrasia cuneata                 | <i>Euphrasia cuneata</i> G.Forst.                                    | FNZO                         |
| 64  | 385 | Rhabdothamnus solandri            | <i>Rhabdothamnus solandri</i> A.Cunn.                                | FNZO                         |
| 65  | 386 | Solanum laciniatum                | <i>Solanum laciniatum</i> Aiton                                      | FNZO                         |
| 66  |     | S. nigrum?                        | Either <i>*Solanum nigrum</i> L. or <i>Solanum nodiflorum</i> Jacq.  | FNZO                         |
| 67  | 387 | Myoporum laetum                   | <i>Myoporum laetum</i> G.Forst.                                      | FNZO                         |
| 68  | 388 | Myoporum pubescens                | incertae sedis                                                       | Allan (1961, p. 958)         |
| 69  | 389 | Avicennia tomentosa ('tomentosa') | <i>Avicennia marina</i> subsp. <i>australasica</i> (Walp.) J.Everett | Walpers (1845, p. 133); FNZO |
| 70  | 390 | Vitex littoralis                  | <i>Vitex lucens</i> Kirk                                             | Allan (1961, p. 959); FNZO   |
| 71  | 391 | Micromeria Cunninghamii           | <i>Mentha cunninghamii</i> Benth.                                    | Allan (1961, p. 962); FNZO   |
| 72  | 392 | Anchusa spathulata                | <i>Myosotis spathulata</i> G.Forst. var. <i>spathulata</i>           | Hooker (1853, p. 201); FNZO  |
| 73  | 393 | Myosotis forsteri ('Forsterii')   | <i>Myosotis forsteri</i> Lehm.                                       | FNZO                         |
| 74  | 394 | Calystegia Sepium                 | <i>Calystegia sepium</i> (L.) R.Br.                                  | FNZO                         |
| 75  | 395 | Calystegia Soldanella             | <i>Calystegia soldanella</i> (L.) R.Br.                              | FNZO                         |
| 76  | 396 | Ipomoea pendula                   | <i>Ipomoea cairica</i> (L.) Sweet                                    | Webb et al (1988, p. 559)    |
| 77  | 397 | Dichondra repens                  | <i>Dichondra repens</i> J.R.Forst. & G.Forst.                        | FNZO                         |
| 78  | 398 | Gentiana Saxosa                   | <i>Gentianella saxosa</i> (G.Forst.) Holub                           | FNZO                         |
| 79  | 399 | Gentiana montana                  | <i>Gentianella montana</i> (G.Forst.) Holub                          | FNZO                         |
| 80  | 400 | Sebaea gracilis                   | <i>Sebaea ovata</i> (Labill.) R.Br.                                  | Allan (1961, p. 765); FNZO   |
| 81  | 401 | Geniostoma ligustrifolium         | <i>Geniostoma ligustrifolium</i> A.Cunn. var. <i>ligustrifolium</i>  | FNZO                         |
| 82  | 402 | Parsonsia heterophylla            | <i>Parsonsia heterophylla</i> A.Cunn.                                | FNZO                         |
| 83  | 403 | Olea apetala                      | <i>Nestegis apetala</i> (Vahl) L.A.S.Johnson                         | FNZO                         |
| 84  | 404 | Achras costata                    | <i>Planchonella costata</i> (Endl.) Pierre                           | FNZO                         |
| 85  | 405 | Myrsine urvillei ('Urvilliae')    | <i>Myrsine australis</i> (A.Rich.) Allan                             | FNZO                         |
| 86  | 406 | Myrsine divaricata                | <i>Myrsine divaricata</i> A.Cunn.                                    | FNZO                         |
| 87  | 407 | Cyathodes acerosa                 | <i>Leptecophylla juniperina</i> (J.R.Forst. & G.Forst.) C.M.Weiller  | FNZO                         |
| 88  | 408 | Leucopogon fasciculatus           | <i>Leucopogon fasciculatus</i> (G.Forst.) A.Rich.                    | FNZO                         |
| 89  | 409 | Leucopogon Fraseri                | <i>Leucopogon fraseri</i> A.Cunn.                                    | FNZO                         |
| 90  | 410 | Pentachondra pumila               | <i>Pentachondra pumila</i> (J.R.Forst. & G.Forst.) R.Br.             | FNZO                         |
| 91  | 411 | Epacris pauciflora                | <i>Epacris pauciflora</i> A.Rich. var. <i>pauciflora</i>             | FNZO                         |
| 92  | 412 | Dracophyllum latifolium           | <i>Dracophyllum latifolium</i> A.Cunn.                               | FNZO                         |

| G #       | P # | Historic name                                   | Current name                                                                          | Authority                     |
|-----------|-----|-------------------------------------------------|---------------------------------------------------------------------------------------|-------------------------------|
| 93        | 413 | <i>Dracophyllum longifolium</i>                 | <i>Dracophyllum longifolium</i> (J.R.Forst. & G.Forst.) R.Br. var. <i>longifolium</i> | FNZO                          |
| [omitted] | 414 | <i>Dracophyllum rosmarinifolium</i>             | <i>Dracophyllum rosmarinifolium</i> (G.Forst.) R.Br.                                  | FNZO                          |
| 94        | 415 | <i>Dracophyllum urvilleanum</i> ('Urvillianum') | <i>Dracophyllum urvilleanum</i> A.Rich.                                               | FNZO                          |
| 95        | 416 | <i>Dracophyllum Lessonianum</i>                 | <i>Dracophyllum lessonianum</i> A.Rich.                                               | FNZO                          |
| 96        | 417 | <i>Gaultheria antipoda</i>                      | <i>Gaultheria antipoda</i> G.Forst.                                                   | FNZO                          |
| 97        | 418 | <i>Gaultheria rupestris</i>                     | <i>Gaultheria rupestris</i> (L.f.) D.Don                                              | FNZO                          |
| 98        | 419 | <i>Gaultheria fluviatilis</i>                   | <i>Gaultheria antipoda</i> G.Forst.                                                   | FNZO                          |
| 99        | 420 | <i>Wahlenbergia gracilis</i>                    | <i>Wahlenbergia vernicosa</i> J.A.Petterson                                           | Petterson (1997, p. 26); FNZO |
| 100       | 421 | <i>Lobelia alata</i>                            | <i>Lobelia anceps</i> L.f.                                                            | Allan (1961, p. 800); FNZO    |
| 101       | 422 | <i>Lobelia angulata</i>                         | <i>Lobelia angulata</i> G.Forst.                                                      | FNZO                          |
| 102       | 423 | <i>Lobelia littoralis</i>                       | <i>Lobelia angulata</i> G.Forst.                                                      | FNZO                          |
| 103       | 424 | <i>Lobelia submersa</i>                         | <i>Glossostigma elatinoides</i> Benth. ex Hook.f.                                     | Allan (1961, p. 846); FNZO    |
| 104       | 425 | <i>Lobelia physaloides</i>                      | <i>Lobelia physaloides</i> A.Cunn.                                                    | FNZO                          |
| 105       | 426 | <i>Stylidium spathulatum</i>                    | Presumably <i>Stylidium subulatum</i> Hook.f.                                         |                               |
| 106       | 427 | <i>Forstera sedifolia</i>                       | <i>Forstera sedifolia</i> G.Forst.                                                    | FNZO                          |
| 107       | 428 | <i>Goodenia repens</i>                          | <i>Selliera radicans</i> Cav.                                                         | Allan (1961, p. 795); FNZO    |
| 108       | 429 | <i>Scaevola Novae Zelandiae</i>                 | <i>Melicytus novae-zelandiae</i> (A.Cunn.) P.S.Green                                  | FNZO                          |
| 109       | 430 | <i>Scorzonera scapigera</i>                     | <i>Microseris scapigera</i> (Sol. ex A.Cunn.) Sch.Bip.                                | FNZO                          |
| 110       | 431 | <i>Sonchus oleraceus</i>                        | * <i>Sonchus oleraceus</i> L.                                                         | FNZO                          |
| 111       | 432 | <i>Picris hieracioides</i>                      | * <i>Picris hieracioides</i> L.                                                       | FNZO                          |
| 112       | 433 | <i>Picris attenuata</i>                         | <i>Picris angustifolia</i> DC.                                                        | FNZO                          |
| 113       | 434 | <i>Shawia paniculata</i>                        | <i>Olearia paniculata</i> (J.R.Forst. & G.Forst.) Druce                               | FNZO                          |
| 114       | 435 | <i>Solidago arborescens</i>                     | <i>Brachyglottis kirkii</i> (Hook.f. ex Kirk) C.J.Webb                                | FNZO                          |
| 115       | 436 | <i>Lagenophora Forsteri</i>                     | <i>Lagenophora pumila</i> (G.Forst.) Cheeseman                                        | FNZO                          |
| 116       | 437 | <i>Lagenophora lanata</i>                       | <i>Lagenophora lanata</i> A.Cunn.                                                     | FNZO                          |
| 117       | 438 | <i>Aster holosericeus</i>                       | <i>Celmisia holosericea</i> (G.Forst.) Hook.f.                                        | FNZO                          |
| 118       | 439 | <i>Aster coriaceus</i>                          | <i>Celmisia coriacea</i> (G.Forst.) Hook.f.                                           | FNZO                          |
| 119       | 440 | <i>Haxtonia furfuracea</i>                      | <i>Olearia furfuracea</i> (A.Rich.) Hook.f.                                           | FNZO                          |
| 120       | 441 | <i>Vittadinia australis</i> ('Vittadenia')      | <i>Vittadinia australis</i> A.Rich.                                                   | FNZO                          |
| 121       | 442 | <i>Bidens pilosa</i>                            | * <i>Bidens pilosa</i> L.                                                             | FNZO                          |
| 122       | 443 | <i>Cotula coronopifolia</i>                     | <i>Cotula coronopifolia</i> L.                                                        | FNZO                          |
| 123       | 444 | <i>Myriogyne minuta</i>                         | <i>Centipeda minima</i> (L.) A.Braun & Asch.                                          | FNZO                          |



| G # | P #            | Historic name              | Current name                                                 | Authority                  |
|-----|----------------|----------------------------|--------------------------------------------------------------|----------------------------|
| 124 | 445            | Soliva tenella             | <i>Leptinella tenella</i> (A.Cunn.) D.G.Lloyd & C.J.Webb     | FNZO                       |
| 125 | 446            | Craspedia uniflora         | <i>Craspedia uniflora</i> G.Forst.                           | FNZO                       |
| 126 | 447            | Cassinia leptophylla       | <i>Ozothamnus leptophyllus</i> (G.Forst.) Breitw. & J.M.Ward | FNZO                       |
| 127 | 448            | Ozothamnus pinifolia       | incertae sedis [ <i>Calea pinifolia</i> G.Forst.]            | Allan (1961, p. 1033)      |
| 128 | 449            | Helichrysum bellidioides   | <i>Anaphalioides bellidioides</i> (G.Forst.) Glenny          | FNZO                       |
| 129 | 450            | Gnaphalium luteoalbum      | <i>Pseudognaphalium luteoalbum</i> (L.) Hilliard & B.L.Burt  | FNZO                       |
| 130 | 451            | Gnaphalium simplex         | <i>Euchiton audax</i> (D.G.Drury) Holub                      | Drury (1972, p. 140); FNZO |
| 131 | 452            | Gnaphalium lanatum         | <i>Euchiton involucratus</i> (G.Forst.) Holub                | Drury (1972, p. 132); FNZO |
| 132 | 453            | Gnaphalium involucratus    | <i>Euchiton involucratus</i> (G.Forst.) Holub                | FNZO                       |
| 133 | 454            | Gnaphalium Keriense        | <i>Anaphalioides trinervis</i> (G.Forst.) Anderb.            | FNZO                       |
| 134 | 455            | Gnaphalium trinerve        | <i>Anaphalioides trinervis</i> (G.Forst.) Anderb.            | FNZO                       |
| 135 | 456            | Arnica oporina ('operina') | <i>Olearia oporina</i> (G.Forst.) Hook.f                     | FNZO                       |
| 136 | 457            | Senecio lautus             | <i>Senecio lautus</i> G.Forst. ex Willd.                     | FNZO                       |
| 137 | 458            | Senecio australis          | <i>Senecio australis</i> Willd.                              | FNZO                       |
| 138 | 459            | Senecio neglectus          | <i>Senecio lautus</i> G.Forst. ex Willd.                     | FNZO                       |
| 139 | 460<br>['466'] | Senecio argutus            | <i>Senecio glomeratus</i> Poir. subsp. <i>glomeratus</i>     | FNZO                       |
| 140 | 461            | Senecio quadridentatus     | <i>Senecio quadridentatus</i> Labill.                        | FNZO                       |
| 141 | 462            | Senecio hispidulus         | <i>Senecio hispidulus</i> A.Rich.                            | FNZO                       |
| 142 | 463            | Brachyglottis repanda      | <i>Brachyglottis repanda</i> J.R.Forst. & G.Forst.           | FNZO                       |
| 143 | 464            | Brachyglottis rotundifolia | <i>Brachyglottis rotundifolia</i> J.R.Forst. & G.Forst.      | FNZO                       |
| 144 | 465            | Brachyglottis rani         | <i>Olearia rani</i> (A.Cunn.) Druce                          | FNZO                       |
| 145 | 466            | Opercularia diphylla       | † <i>Opercularia diphylla</i> Gaertn.                        | Hooker (1864, p. 121)      |
| 146 | 467            | Opercularia aspera         | † <i>Opercularia aspera</i> Gaertn.                          | Hooker (1864, p. 121)      |
| 147 | 468            | Galium tenuicaule          | <i>Galium trilobum</i> Colenso                               | Webb et al (1988, p. 1150) |
| 148 | 469            | Galium propinquum          | <i>Galium propinquum</i> A.Cunn.                             | FNZO                       |
| 149 | 470            | Coprosma lucida            | <i>Coprosma lucida</i> J.R.Forst. & G.Forst.                 | FNZO                       |
| 150 | 471            | Coprosma foetidissima      | <i>Coprosma foetidissima</i> J.R.Forst. & G.Forst.           | FNZO                       |
| 151 | 472            | Coprosma propinqua         | <i>Coprosma propinqua</i> A.Cunn.                            | FNZO                       |
| 152 | 473            | Coprosma rotundifolia      | <i>Coprosma rotundifolia</i> A.Cunn.                         | FNZO                       |
| 153 | 475            | Coprosma gracilis          | <i>Coprosma lucida</i> × <i>C. rhamnoides</i>                | Allan (1961, p. 586)       |
| 154 | 474            | Coprosma rhamnoides        | <i>Coprosma rhamnoides</i> A.Cunn.                           | FNZO                       |
| 155 | 476            | Coprosma divaricata        | <i>Coprosma rhamnoides</i> A.Cunn.                           | Allan (1961, p. 586)       |

| G # | P # | Historic name                | Current name                                                                          | Authority                                        |
|-----|-----|------------------------------|---------------------------------------------------------------------------------------|--------------------------------------------------|
| 156 | 477 | Coprosma acerosa             | <i>Coprosma acerosa</i> A.Cunn.                                                       | FNZO                                             |
| 157 | 478 | Coprosma repens              | <i>Coprosma repens</i> A.Rich.                                                        | FNZO                                             |
| 158 | 479 | Coprosma spathulata          | <i>Coprosma spathulata</i> A.Cunn. subsp. <i>spathulata</i>                           | FNZO                                             |
| 159 | 480 | Ronabea australis            | <i>Coprosma grandifolia</i> Hook.f.                                                   | Hooker (1852, p. 104)                            |
| 160 | 481 | Nertera depressa             | <i>Nertera depressa</i> Banks & Sol. ex Gaertn.                                       | FNZO                                             |
| 161 | 482 | Geophyla dichondraefolia     | <i>Nertera dichondrifolia</i> (A.Cunn.) Hook.f.                                       | FNZO                                             |
| 162 | 483 | Viscum antarcticum           | <i>Tupeia antarctica</i> (G.Forst.) Cham. & Schltdl.                                  | FNZO                                             |
| 163 | 484 | Viscum pubigerum             | <i>Tupeia antarctica</i> (G.Forst.) Cham. & Schltdl.                                  | FNZO                                             |
| 164 | 485 | Viscum salicornioides        | <i>Korthalsella salicornioides</i> (A.Cunn.) Tiegh.                                   | FNZO                                             |
| 165 | 486 | Loranthus tetrapetalus       | <i>Peraxilla tetrapetala</i> (L.f.) Tiegh.                                            | FNZO                                             |
| 166 | 487 | Alseuosmia linariifolia      | <i>Alseuosmia banksii</i> var. <i>linariifolia</i> (A.Cunn.) R.O.Gardner              | FNZO                                             |
| 167 | 488 | Alseuosmia ligustrifolia     | <i>Alseuosmia banksii</i> var. <i>linariifolia</i> (A.Cunn.) R.O.Gardner              | FNZO                                             |
| 168 | 489 | Alseuosmia Banksii           | <i>Alseuosmia banksii</i> A.Cunn. var. <i>banksii</i>                                 | FNZO                                             |
| 169 | 490 | Alseuosmia palaeformis       | <i>Alseuosmia banksii</i> A.Cunn. var. <i>banksii</i>                                 | FNZO                                             |
| 170 | 491 | Alseuosmia atriplicifolia    | <i>Alseuosmia banksii</i> A.Cunn. var. <i>banksii</i>                                 | FNZO                                             |
| 171 | 492 | Alseuosmia Ilex              | <i>Alseuosmia quercifolia</i> A.Cunn.                                                 | FNZO                                             |
| 172 | 493 | Alseuosmia quercifolia       | <i>Alseuosmia quercifolia</i> A.Cunn.                                                 | FNZO                                             |
| 173 | 494 | Alseuosmia macrophylla       | <i>Alseuosmia macrophylla</i> A.Cunn.                                                 | FNZO                                             |
| 174 | 495 | Hydrocotyle elongata         | <i>Hydrocotyle elongata</i> A.Cunn.                                                   | FNZO                                             |
| 175 | 496 | Hydrocotyle microphylla      | <i>Hydrocotyle microphylla</i> A.Cunn.                                                | FNZO                                             |
| 176 | 497 | Hydrocotyle Novae Zealandiae | <i>Hydrocotyle novae-zeelandiae</i> DC.                                               | FNZO                                             |
| 177 | 498 | Hydrocotyle dichondraefolia  | <i>Hydrocotyle novae-zeelandiae</i> DC.                                               | FNZO                                             |
| 178 | 499 | Hydrocotyle heteromeria      | <i>Hydrocotyle heteromeria</i> A.Rich.                                                | FNZO                                             |
| 179 | 500 | Hydrocotyle compacta         | <i>Hydrocotyle moschata</i> G.Forst. (sens lat.?)                                     | Cheeseman (1906, p. 1137)                        |
| 180 | 501 | Hydrocotyle moschata         | <i>Hydrocotyle moschata</i> G.Forst. var. <i>moschata</i>                             | FNZO                                             |
| 181 | 502 | Hydrocotyle Asiatica         | <i>Centella uniflora</i> (Colenso) Nannf.                                             | Allan (1961, p. 451); FNZO                       |
| 182 | 503 | Petroselinum prostratum      | <i>Apium prostratum</i> Labill. ex Vent. subsp. <i>prostratum</i>                     | Allan (1961, p. 463); FNZO                       |
| 183 | 504 | Petroselinum filiforme       | <i>Apium prostratum</i> subsp. <i>prostratum</i> var. <i>filiforme</i> (A.Rich.) Kirk | FNZO                                             |
| 184 | 505 | Ligusticum Aciphylla         | <i>Aciphylla squarrosa</i> J.R.Forst. & G.Forst. var. <i>squarrosa</i>                | Hooker (1852, p. 87); FNZO                       |
| 185 | 506 | Ligusticum Gingidium         | <i>Gingidia montana</i> (J.R.Forst. & G.Forst.) J.W.Dawson                            | FNZO                                             |
| 186 | 507 | Peucedanum geniculatum       | <i>Scandia geniculata</i> (G.Forst.) J.W.Dawson                                       | FNZO                                             |
| 187 | 508 | Apium graveolens             | <i>Apium prostratum</i> Labill. ex Vent. subsp. <i>prostratum</i>                     | Hooker (1852, p. 86); Allan (1961, p. 463); FNZO |

| G # | P # | Historic name                    | Current name                                                        | Authority                                        |
|-----|-----|----------------------------------|---------------------------------------------------------------------|--------------------------------------------------|
| 188 | 509 | <i>Panax simplex</i>             | <i>Raukaua simplex</i> (G.Forst.) A.D.Mitch.                        | FNZO                                             |
| 189 | 510 | <i>Panax arboreum</i>            | <i>Pseudopanax arboreus</i> (Murray) Philipson                      | FNZO                                             |
| 190 | 511 | <i>Cussonia Lessonii</i>         | <i>Pseudopanax lessonii</i> (DC.) K.Koch                            | FNZO                                             |
| 191 | 512 | <i>Polyscias pinnata</i>         | † <i>Polyscias pinnata</i> J.R. Forst. & G. Forst.                  | Hooker (1852, p. 97)                             |
| 192 | 513 | <i>Aralia schefflera</i>         | <i>Schefflera digitata</i> J.R.Forst. & G.Forst.                    | FNZO                                             |
| 193 | 514 | <i>Aralia crassifolia</i>        | <i>Pseudopanax crassifolius</i> (Sol. ex A.Cunn.) K.Koch            | FNZO                                             |
| 194 | 515 | <i>Quintinia serrata</i>         | <i>Quintinia serrata</i> A.Cunn.                                    | FNZO                                             |
| 195 | 516 | <i>Weinmannia betulina</i>       | <i>Weinmannia silvicola</i> var. <i>betulina</i> (A.Cunn.) Hook.f.  | FNZO                                             |
| 196 | 517 | <i>Weinmannia fuchsioides</i>    | <i>Weinmannia silvicola</i> var. <i>betulina</i> (A.Cunn.) Hook.f.  | Allan (1961, p. 348); FNZO                       |
| 197 | 518 | <i>Weinmannia silvicola</i>      | <i>Weinmannia silvicola</i> Sol. ex A.Cunn. var. <i>silvicola</i>   | FNZO                                             |
| 198 | 519 | <i>Leiospermum racemosum</i>     | <i>Weinmannia racemosa</i> L.f.                                     | FNZO                                             |
| 199 | 520 | <i>Ackama rosaefolia</i>         | <i>Ackama rosifolia</i> A.Cunn.                                     | FNZO                                             |
| 200 | 521 | <i>Tillaea verticillaris</i>     | <i>Crassula sieberiana</i> (Schult. & Schult.f.) Druce              | FNZO                                             |
| 201 | 522 | <i>Mesembryanthemum australe</i> | <i>Disphyma australe</i> (W.T.Aiton) N.E.Br.                        | FNZO                                             |
| 202 | 523 | <i>Tetragonia expansa</i>        | <i>Tetragonia tetragonoides</i> (Pall.) Kuntze                      | FNZO                                             |
| 203 | 524 | <i>Passiflora tetrandra</i>      | <i>Passiflora tetrandra</i> Banks ex DC.                            | FNZO                                             |
| 204 | 525 | <i>Sicyos australis</i>          | <i>Sicyos mawhai</i> I.Telford & P.Sebastian                        | Telford et al. (2012)                            |
| 205 | 526 | <i>Cercodia erecta</i>           | <i>Haloragis erecta</i> (Banks ex Murray) Oken subsp. <i>erecta</i> | FNZO                                             |
| 206 | 527 | <i>Cercodia alternifolia</i>     | <i>Haloragis erecta</i> (Banks ex Murray) Oken subsp. <i>erecta</i> | FNZO                                             |
| 207 | 528 | <i>Cercodia incana</i>           | <i>Gonocarpus incanus</i> (A.Cunn.) Orchard                         | FNZO                                             |
| 208 | 529 | <i>Gonocarpus tetragynus</i>     | <i>Gonocarpus incanus</i> (A.Cunn.) Orchard                         | Hooker (1852, p. 62); Allan (1961, p. 245); FNZO |
| 209 | 530 | <i>Gonocarpus citriodorus</i>    | <i>Gonocarpus micranthus</i> Thunb. (1783)                          | Allan (1961, p. 244); FNZO                       |
| 210 | 531 | <i>Gonocarpus depressus</i>      | <i>Gonocarpus aggregatus</i> (Buchanan) Orchard                     | FNZO                                             |
| 211 | 532 | <i>Myriophyllum propinquum</i>   | <i>Myriophyllum propinquum</i> A.Cunn.                              | FNZO                                             |
| 212 | 533 | <i>Fuchsia excorticata</i>       | <i>Fuchsia excorticata</i> (J.R.Forst. & G.Forst.) L.f.             | FNZO                                             |
| 213 | 534 | <i>Fuchsia procumbens</i>        | <i>Fuchsia procumbens</i> A.Cunn.                                   | FNZO                                             |
| 214 | 535 | <i>Epilobium nummularifolium</i> | <i>Epilobium nummularifolium</i> A.Cunn.                            | FNZO                                             |
| 215 | 536 | <i>Epilobium pedunculare</i>     | <i>Epilobium pedunculare</i> A.Cunn.                                | FNZO                                             |
| 216 | 537 | <i>Epilobium microphyllum</i>    | <i>Epilobium microphyllum</i> A.Rich.                               | FNZO                                             |
| 217 | 538 | <i>Epilobium rotundifolium</i>   | <i>Epilobium rotundifolium</i> G.Forst.                             | FNZO                                             |
| 218 | 539 | <i>Epilobium thymifolium</i>     | <i>Epilobium alsinoides</i> A.Cunn. subsp. <i>alsinoides</i>        | FNZO                                             |
| 219 | 540 | <i>Epilobium alsinoides</i>      | <i>Epilobium alsinoides</i> A.Cunn. subsp. <i>alsinoides</i>        | FNZO                                             |

| G # | P # | Historic name                           | Current name                                                                               | Authority                   |
|-----|-----|-----------------------------------------|--------------------------------------------------------------------------------------------|-----------------------------|
| 220 | 541 | <i>Epilobium nerterioides</i>           | <i>Epilobium nerterioides</i> A.Cunn.                                                      | FNZO                        |
| 221 | 542 | <i>Epilobium atriplicifolium</i>        | <i>Epilobium alsinoides</i> subsp. <i>atriplicifolium</i> (A.Cunn.) P.H.Raven & Engelnhorn | FNZO                        |
| 222 | 543 | <i>Epilobium pubens</i>                 | <i>Epilobium pubens</i> A.Rich.                                                            | FNZO                        |
| 223 | 544 | <i>Epilobium cinereum</i> ('ciniarium') | <i>Epilobium billardioreanum</i> subsp. <i>cinereum</i> (A.Rich.) P.H.Raven & Engelnhorn   | FNZO                        |
| 224 | 545 | <i>Epilobium incanum</i>                | <i>Epilobium billardioreanum</i> subsp. <i>cinereum</i> (A.Rich.) P.H.Raven & Engelnhorn   | FNZO                        |
| 225 | 546 | <i>Epilobium hirtigerum</i>             | <i>Epilobium hirtigerum</i> A.Cunn.                                                        | FNZO                        |
| 226 | 547 | <i>Epilobium virgatum</i>               | <i>Epilobium billardioreanum</i> subsp. <i>cinereum</i> (A.Rich.) P.H.Raven & Engelnhorn   | FNZO                        |
| 227 | 548 | <i>Epilobium glabellum</i>              | <i>Epilobium glabellum</i> G.Forst.                                                        | FNZO                        |
| 228 | 549 | <i>Epilobium confertum</i>              | <i>Epilobium billardioreanum</i> subsp. <i>cinereum</i> (A.Rich.) P.H.Raven & Engelnhorn   | FNZO                        |
| 229 | 550 | <i>Epilobium pallidiflorum</i>          | <i>Epilobium pallidiflorum</i> A.Cunn.                                                     | FNZO                        |
| 230 | 551 | <i>Epilobium junceum</i>                | <i>Epilobium billardioreanum</i> subsp. <i>cinereum</i> (A.Rich.) P.H.Raven & Engelnhorn   | FNZO                        |
| 231 | 552 | <i>Epilobium haloragifolium</i>         | <i>Epilobium alsinoides</i> A.Cunn. subsp. <i>alsinoides</i>                               | Hooker (1855, p. 329); FNZO |
| 232 | 553 | <i>Leptospermum Scoparium</i>           | <i>Leptospermum scoparium</i> J.R.Forst. & G.Forst.                                        | FNZO                        |
| 233 | 554 | <i>Leptospermum ericoides</i>           | <i>Kunzea ericoides</i> (A.Rich.) Joy Thomps.                                              | FNZO                        |
| 234 | 555 | <i>Metrosideros buxifolia</i>           | <i>Metrosideros perforata</i> (J.R.Forst. & G.Forst.) A.Rich.                              | Allan (1961, p. 327); FNZO  |
| 235 | 556 | <i>Metrosideros perforata</i>           | <i>Metrosideros perforata</i> (J.R.Forst. & G.Forst.) A.Rich.                              | FNZO                        |
| 236 | 557 | <i>Metrosideros robusta</i>             | <i>Metrosideros robusta</i> A.Cunn.                                                        | FNZO                        |
| 237 | 558 | <i>Metrosideros tomentosa</i>           | <i>Metrosideros excelsa</i> Sol. ex Gaertn.                                                | FNZO                        |
| 238 | 559 | <i>Metrosideros florida</i>             | <i>Metrosideros fulgens</i> Sol. ex Gaertn.                                                | FNZO                        |
| 239 | 560 | <i>Metrosideros diffusa</i>             | <i>Metrosideros diffusa</i> (G.Forst.) Sm.                                                 | FNZO                        |
| 240 | 561 | <i>Metrosideros lucida</i>              | <i>Metrosideros umbellata</i> Cav.                                                         | FNZO                        |
| 241 | 562 | <i>Metrosideros hypericifolia</i>       | <i>Metrosideros diffusa</i> (G.Forst.) Sm.                                                 | FNZO                        |
| 242 | 563 | <i>Metrosideros salicifolia</i>         | mixture of <i>Nestegis montana</i> and <i>Mida salicifolia</i> var. <i>salicifolia</i>     | Hooker (1853, p. 176)       |
| 243 | 564 | <i>Eugenia maire</i>                    | <i>Syzygium maire</i> (A.Cunn.) Sykes & Garn.-Jones                                        | FNZO                        |
| 244 | 565 | <i>Myrtus bullata</i>                   | <i>Lophomyrtus bullata</i> Burret                                                          | FNZO                        |
| 245 | 566 | <i>Acaena sanguisorbae</i>              | <i>Acaena anserinifolia</i> (J.R.Forst. & G.Forst.) J.B.Armstr.                            | FNZO                        |
| 246 | 567 | <i>Rubus australis</i>                  | <i>Rubus australis</i> G.Forst.                                                            | FNZO                        |

| G # | P # | Historic name                            | Current name                                                 | Authority                                     |
|-----|-----|------------------------------------------|--------------------------------------------------------------|-----------------------------------------------|
| 247 | 568 | <i>Rubus schmidelioides</i>              | <i>Rubus schmidelioides</i> A.Cunn.                          | FNZO                                          |
| 248 | 569 | <i>Rubus cissoides</i> ('cissoides')     | <i>Rubus cissoides</i> A.Cunn.                               | FNZO                                          |
| 249 | 570 | <i>Edwardsia microphylla</i>             | <i>Sophora microphylla</i> Aiton                             | FNZO                                          |
| 250 | 571 | <i>Edwardsia grandiflora</i>             | <i>Sophora tetraptera</i> J.F.Mill.                          | FNZO                                          |
| 251 | 572 | <i>Clianthus puniceus</i>                | <i>Clianthus puniceus</i> (G.Don) Sol. ex Lindl.             | FNZO                                          |
| 252 | 573 | <i>Guilandina</i> Bonduc                 | † <i>Caesalpinia (Guilandina) bonduc</i> (L.) Roxb.          | Hooker (1864, p. 53); Gillis & Proctor (1974) |
| 253 | 574 | <i>Carmichaelia australis</i>            | <i>Carmichaelia australis</i> R.Br.                          | FNZO                                          |
| 254 | 575 | <i>Carpodetus serratus</i>               | <i>Carpodetus serratus</i> J.R.Forst. & G.Forst.             | FNZO                                          |
| 255 | 576 | <i>Pennantia corymbosa</i>               | <i>Pennantia corymbosa</i> J.R.Forst. & G.Forst.             | FNZO                                          |
| 256 | 577 | <i>Pomaderris kumeraho</i> ('Kumarahou') | <i>Pomaderris kumeraho</i> A.Cunn.                           | FNZO                                          |
| 257 | 578 | <i>Pomaderris ericifolia</i>             | <i>Pomaderris phyllicifolia</i> Lodd. ex Link                | Allan (1961, p. 423); FNZO                    |
| 258 | 579 | <i>Corokia buddleioides</i>              | <i>Corokia buddleioides</i> A.Cunn. var. <i>buddleioides</i> | FNZO                                          |
| 259 | 580 | <i>Ixerba brexioides</i>                 | <i>Ixerba brexioides</i> A.Cunn.                             | FNZO                                          |
| 260 | 581 | <i>Coriaria sarmentosa</i>               | <i>Coriaria sarmentosa</i> G.Forst.                          | FNZO                                          |
| 261 | 582 | <i>Melicope ternata</i>                  | <i>Melicope ternata</i> J.R.Forst. & G.Forst.                | FNZO                                          |
| 262 | 583 | <i>Melicope simplex</i>                  | <i>Melicope simplex</i> A.Cunn.                              | FNZO                                          |
| 263 | 584 | <i>Oxalis Urvillei</i>                   | <i>Oxalis rubens</i> Haw.                                    | Allan (1961, p. 238–239); FNZO                |
| 264 | 585 | <i>Oxalis catarractae</i>                | <i>Oxalis magellanica</i> G.Forst.                           | FNZO                                          |
| 265 | 586 | <i>Oxalis propinqua</i>                  | <i>Oxalis rubens</i> Haw.                                    | FNZO                                          |
| 266 | 587 | <i>Oxalis exilis</i>                     | <i>Oxalis exilis</i> A.Cunn.                                 | FNZO                                          |
| 267 | 588 | <i>Oxalis divergens</i>                  | <i>Oxalis rubens</i> Haw.                                    | FNZO                                          |
| 268 | 589 | <i>Oxalis tenuicaulis</i>                | <i>Oxalis exilis</i> A.Cunn.                                 | FNZO                                          |
| 269 | 590 | <i>Oxalis laticola</i>                   | <i>Oxalis rubens</i> Haw.                                    | FNZO                                          |
| 270 | 591 | <i>Oxalis ciliifera</i>                  | <i>Oxalis exilis</i> A.Cunn.                                 | FNZO                                          |
| 271 | 592 | <i>Oxalis crassifolia</i>                | <i>Oxalis rubens</i> Haw.                                    | FNZO                                          |
| 272 | 593 | <i>Geranium pilosum</i>                  | <i>Geranium solanderi</i> Carolin                            | FNZO                                          |
| 273 | 594 | <i>Geranium retrorsum</i>                | <i>Geranium retrorsum</i> L'Hér. ex DC.                      | FNZO                                          |
| 274 | 595 | <i>Pelargonium clandestinum</i>          | <i>Pelargonium inodorum</i> Willd.                           | FNZO                                          |
| 275 | 596 | <i>Hypericum pusillum</i>                | <i>Hypericum pusillum</i> Choisy                             | FNZO                                          |
| 276 | 597 | <i>Hartighsea spectabilis</i>            | <i>Dysoxylum spectabile</i> (G.Forst.) Hook.f.               | FNZO                                          |
| 277 | 598 | <i>Alectryon excelsum</i>                | <i>Alectryon excelsus</i> Gaertn. subsp. <i>excelsus</i>     | FNZO                                          |
| 278 | 599 | <i>Dodonaea spathulata</i>               | <i>Dodonaea viscosa</i> Jacq. subsp. <i>viscosa</i>          | FNZO                                          |

| G # | P #                        | Historic name                            | Current name                                                                  | Authority                   |
|-----|----------------------------|------------------------------------------|-------------------------------------------------------------------------------|-----------------------------|
| 279 | 600                        | Hoheria populnea                         | <i>Hoheria populnea</i> A.Cunn.                                               | FNZO                        |
| 280 | 601                        | Entelia arborescens                      | <i>Entelea arborescens</i> R.Br.                                              | FNZO                        |
| 281 | 602                        | Elaeocarpus Hinau                        | <i>Elaeocarpus dentatus</i> (J.R.Forst. & G.Forst.) Vahl var. <i>dentatus</i> | FNZO                        |
| 282 | 603                        | Friesia racemosa                         | <i>Aristotelia serrata</i> (J.R.Forst. & G.Forst.) W.R.B.Oliv.                | FNZO                        |
| 283 | 604                        | Plagianthus divaricatus                  | <i>Plagianthus divaricatus</i> J.R.Forst. & G.Forst.                          | FNZO                        |
| 284 | 605                        | Plagianthus betulinus                    | <i>Plagianthus regius</i> (Poit.) Hochr. subsp. <i>regius</i>                 | FNZO                        |
| 285 | 606                        | Plagianthus urticinus                    | <i>Plagianthus regius</i> (Poit.) Hochr. subsp. <i>regius</i>                 | Allan (1961, p. 337); FNZO  |
| 286 | 607                        | Hibiscus vesicarius                      | * <i>Hibiscus trionum</i> L. var. <i>trionum</i>                              | FNZO                        |
| 287 | 608                        | Linum monogynum                          | <i>Linum monogynum</i> G.Forst. var. <i>monogynum</i>                         | FNZO                        |
| 288 | 609                        | Arenaria media                           | * <i>Spergularia media</i> (L.) C.Presl                                       | FNZO                        |
| 289 | [no number, should be 610] | Stellaria media                          | * <i>Stellaria media</i> (L.) Vill.                                           | FNZO                        |
| 290 | 611 ['610']                | Elatine gratioloides                     | <i>Elatine gratioloides</i> A.Cunn.                                           | FNZO                        |
| 291 | 612                        | Pittosporum crassifolium                 | <i>Pittosporum crassifolium</i> Banks & Sol. ex A.Cunn.                       | FNZO                        |
| 292 | 613                        | Pittosporum umbellatum                   | <i>Pittosporum umbellatum</i> Banks & Sol. ex Gaertn.                         | FNZO                        |
| 293 | 614                        | Pittosporum eugenioides                  | <i>Pittosporum eugenioides</i> A.Cunn.                                        | FNZO                        |
| 294 | 615                        | Pittosporum tenuifolium                  | <i>Pittosporum tenuifolium</i> Sol. ex Gaertn.                                | FNZO                        |
| 295 | 616                        | Pittosporum cornifolium                  | <i>Pittosporum cornifolium</i> A.Cunn.                                        | FNZO                        |
| 296 | 617                        | Pittosporum reflexum                     | <i>Pittosporum pimeleoides</i> A.Cunn. subsp. <i>pimeleoides</i>              | FNZO                        |
| 297 | 618                        | Pittosporum pimelioides ('pinieleoides') | <i>Pittosporum pimeleoides</i> A.Cunn. subsp. <i>pimeleoides</i>              | FNZO                        |
| 298 | 619                        | Pittosporum radicans                     | <i>Pittosporum pimeleoides</i> A.Cunn. subsp. <i>pimeleoides</i>              | FNZO                        |
| 299 | 620                        | Drosera propinqua                        | <i>Drosera spatulata</i> Labill.                                              | Allan (1961, p. 1016); FNZO |
| 300 | 621                        | Drosera intermedia                       | <i>Drosera binata</i> Labill.                                                 | FNZO                        |
|     |                            | Drosera collina                          | <i>Drosera auriculata</i> Backh. ex Planch.                                   |                             |
| 301 | 622                        | Erpetion spathulata                      | <i>Viola cunninghamii</i> Hook.f.                                             | Hooker (1852, p. 16); FNZO  |
| 302 | 623                        | Melicytus ramiflorus                     | <i>Melicytus ramiflorus</i> J.R.Forst. & G.Forst. subsp. <i>ramiflorus</i>    | FNZO                        |
| 303 | 624                        | Melicytus macrophyllus                   | <i>Melicytus macrophyllus</i> A.Cunn.                                         | FNZO                        |
| 304 | 625                        | Nasturtium sylvestre                     | <i>Rorippa palustris</i> (L.) Besser                                          | FNZO                        |
| 305 | 626                        | Cardamine debilis                        | <i>Cardamine debilis</i> Banks ex DC.                                         | FNZO                        |
| 306 | 627                        | Alyssum maritimum                        | * <i>Lobularia maritima</i> (L.) Desv.                                        | FNZO                        |



| G # | P # | Historic name              | Current name                                                   | Authority                      |
|-----|-----|----------------------------|----------------------------------------------------------------|--------------------------------|
| 307 | 628 | Lepidium oleraceum         | <i>Lepidium oleraceum</i> G.Forst. ex Sparrm.                  | FNZO                           |
| 308 | 629 | Drimys axillaris           | <i>Pseudowintera axillaris</i> (J.R.Forst. & G.Forst.) Dandy   | FNZO                           |
| 309 | 630 | Ranunculus rivularis       | <i>Ranunculus amphitrichus</i> Colenso                         | FNZO                           |
| 310 | 631 | Ranunculus acaulis         | <i>Ranunculus acaulis</i> Banks & Sol. ex DC.                  | FNZO                           |
| 311 | 632 | Ranunculus acris           | * <i>Ranunculus acris</i> L.                                   | FNZO                           |
| 312 | 633 | Ranunculus plebeius        | <i>Ranunculus reflexus</i> Garn.-Jones                         | Allan (1961, p. 153); FNZO     |
| 313 | 634 | Ranunculus hirtus          | <i>Ranunculus reflexus</i> Garn.-Jones                         | FNZO                           |
| 314 | 635 | Clematis indivisa          | <i>Clematis paniculata</i> J.F.Gmel.                           | FNZO                           |
| 315 | 636 | Clematis parviflora        | <i>Clematis cunninghamii</i> Turcz.                            | FNZO                           |
| 316 | 637 | Clematis hexasepala        | <i>Clematis forsteri</i> J.F.Gmel.                             | FNZO                           |
| 317 | 638 | Corynocarpus laevigata     | <i>Corynocarpus laevigatus</i> J.R.Forst. & G.Forst.           | FNZO                           |
| 318 | 639 | Griselinia lucida          | <i>Griselinia lucida</i> G.Forst.                              | FNZO                           |
|     |     | Xylosma orbiculatum        | † <i>Xylosma orbiculata</i> (J.R. Forst. & G. Forst.) G.Forst. | Fosberg (1993)                 |
| 319 | 77  | Sphagnum latifolium        | <i>Sphagnum</i> sp. indet.                                     |                                |
| 320 | 78  | Gymnostomum gracile        | <i>Leptostomum inclinans</i> R.Br.                             | NTA                            |
| 321 | 79  | Gymnostomum macrocarpum    | <i>Leptostomum macrocarpon</i> (Hedw.) Bach.Pyl.               | Beever, Allison & Child (1992) |
| 322 | 80  | Gymnostomum leptostomum    | <i>Leptostomum erectum</i> R.Br.                               | NTA                            |
| 323 | 81  | Polytrichum subulatum      | <i>Pogonatum subulatum</i> (Brid.) Brid.                       | NTA                            |
| 324 | 82  | Polytrichum dendroides     | <i>Dendroligotrichum dendroides</i> (Hedw.) Broth.             | NTA                            |
| 325 | 83  | Polytrichum tenuirostrae   | <i>Oligotrichum tenuirostre</i> (Hook.) A.Jaeger               | NTA                            |
| 326 | 84  | Dicranum glaucum           | <i>Leucobryum candidum</i> (Brid. Ex P.Beauv.) Wilson          | NTA                            |
| 327 | 85  | Dicranum Billardieri       | <i>Dicranoloma billardieri</i> (Brid.) Paris                   | NTA                            |
| 328 | 86  | Dicranum dicarpon          | <i>Dicranoloma dicarpum</i> (Nees) Paris                       | NTA                            |
| 329 | 87  | Trichostomum perichaetiale | <i>Holomitrium perichaetiale</i> (Hook.) Brid.                 | NTA                            |
| 330 | 88  | Leucodon calycinus         | <i>Dicnemon calycinum</i> (Hook.) Schwägr.                     | NTA                            |
| 331 | 89  | Zygodon conoideum          | <i>Zygodon intermedius</i> Bruch & Schimp.                     | NTA                            |
| 332 | 90  | Orthotrichum prorepens     | <i>Macromitrium prorepens</i> (Hook.) Schwägr.                 | NTA                            |
| 333 | 91  | Orthotrichum longirostrum  | <i>Macromitrium longirostre</i> (Hook.) Schwägr.               | NTA                            |
| 334 | 92  | Orthotrichum longipes      | <i>Macromitrium longipes</i> (Hook.) Schwägr.                  | NTA                            |
| 335 | 93  | Orthotrichum gracile       | <i>Macromitrium gracile</i> (Hook.) Schwägr.                   | NTA                            |
| 336 | 94  | Neckera planifolia         | <i>Trachyloma planifolium</i> (Hedw.) Brid.                    | NTA                            |
| 337 | 95  | Neckera setosa             | <i>Cladomnion setosum</i> (Hedw.) Wilson                       | NTA                            |
| 338 | 96  | Bartramia pendula          | <i>Breutelia pendula</i> (Sm.) Mitt.                           | NTA                            |

| G # | P #       | Historic name             | Current name                                                                          | Authority                    |
|-----|-----------|---------------------------|---------------------------------------------------------------------------------------|------------------------------|
| 339 | 97        | Codonoblepharum Menziesii | <i>Zygodon menziesii</i> (Schwägr.) Arn.                                              | NTA                          |
| 340 | [omitted] | Bryum bartramoides        | <i>Cryptopodium bartramoides</i> (Hook.) Brid.                                        | FNZO                         |
| 341 | [omitted] | Bryum dichotomum          | <i>Bryum dichotomum</i> Hedw.                                                         | FNZO                         |
| 342 | 100       | Hookeria pennata          | <i>Cyathophorum bulbosum</i> (Hedw.) Müll.Hal.                                        | NTA                          |
| 343 | 101       | Hookeria quadrifaria      | <i>Achrophyllum quadrifarium</i> (Sm.) Vitt & Crosby                                  | NTA                          |
| 344 | 102       | Hookeria rotulata         | <i>Hypopterygium didictyon</i> Müll.Hal.                                              | NTA                          |
| 345 | 103       | Leskea sulcata            | <i>Braithwaitea sulcata</i> (Hook.) A.Jaeger                                          | NTA                          |
| 346 | 104       | Leskea ericoides          | <i>Cladomnion ericoides</i> (Hook.) Hook.f. & Wilson                                  | NTA                          |
| 347 | 105       | Leskea mollis             | <i>Weymouthia mollis</i> (Hedw.) Broth.                                               | NTA                          |
| 348 | 106       | Leskea concinna           | <i>Lopidium concinnum</i> (Hook.) Hook.f. & Wilson                                    | NTA                          |
| 349 | 107       | Hypnum spiniforme         | <i>Pyrrhobryum paramattense</i> (Müll.Hal.) Manuel                                    | FNZO                         |
| 350 | 108       | Hypnum spininervium       | <i>Hypnodendron spininervium</i> (Hook.) A.Jaeger & Sauerb.                           | NTA                          |
| 351 | 109       | Hypnum bifarium           | <i>Pyrrhobryum bifarium</i> (Hook.) Manuel                                            | FNZO                         |
| 352 | 110       | Hypnum distichum          | <i>Rhizogonium distichum</i> (Sw.) Brid.                                              | FNZO                         |
| 353 | 111       | Hypnum amoenum            | <i>Rhaphidorrhynchium amoenum</i> (Hedw.) M.Fleisch.                                  | FNZO                         |
| 354 | 112       | Hypnum leptorrhynchon     | <i>Rhaphidorrhynchium amoenum</i> (Hedw.) M.Fleisch.                                  | FNZO                         |
| 355 | 113       | Hypnum aciculare          | <i>Ptychomnion aciculare</i> (Brid.) Mitt.                                            | NTA                          |
| 356 | 114       | Hypnum gratum             | <i>Thuidiopsis sparsa</i> (Hook.f. & Wilson) Broth. var. <i>sparsa</i>                | NTA                          |
| 357 | 115       | Hypnum comosum            | <i>Mniodendron comosum</i> (Labill.) Lindb. var. <i>comosum</i>                       | NTA                          |
| 358 | 116       | Hypnum Menziesii          | <i>Sciadocladus menziesii</i> (Hook.) Broth. subsp. <i>menziesii</i>                  | NTA                          |
| 359 | 117       | Hypnum Neckerioides       | <i>Thamnobryum neckerioides</i> (Hook.) E. Lawton                                     | NTA                          |
| 360 | 118       | Hypnum arbuscula          | <i>Camptochaete arbuscula</i> (Sm.) Reichardt                                         | NTA                          |
| 361 | 119       | Hypnum flexile            | <i>Weymouthia cochlearifolia</i> (Schwägr.) Dixon                                     | NTA                          |
| 362 | 120       | Hypnum Mongeotianum       | <i>Hymenodon pilifer</i> Hook.f. & Wilson                                             | NTA                          |
| 363 | 121       | Racopilum tomentosum      | <i>Racopilum cuspidigerum</i> var. <i>convolutaceum</i> (Müll.Hal.) Zanten & Dijkstra | NTA                          |
| 364 | 122       | Jungermannia scolopendra  | <i>Lepicolea scolopendra</i> (Hook.) Dumort. ex Trevis.                               | Engel & Glenny (2008 p. 99)  |
| 365 | 123       | Jungermannia saccata      | <i>Tylimanthus saccatus</i> (Hook.) Mitt.                                             | Hodgson (1957)               |
| 366 | 124       | Jungermannia falcata      | <i>Adelanthus falcatus</i> (Hook.) Mitt.                                              | Engel & Glenny (2008 p. 621) |
| 367 | 125       | Jungermannia adiantoides  | <i>Plagiochila annotina</i> Lindenb.                                                  | Hooker (1854, p. 131)        |
| 368 | 126       | Jungermannia conjugata    | <i>Plagiochila conjugata</i> (Hook.) Dumort.                                          | Hodgson (1942)               |
| 369 | 127       | Jungermannia ramosissima  | <i>Plagiochila ramosissima</i> (Hook.) Lindenb.                                       | Hodgson (1943)               |
| 370 | 128       | Jungermannia gigantea     | <i>Plagiochila gigantea</i> (Hook.) Dumort.                                           | Hodgson (1943)               |

| G # | P # | Historic name              | Current name                                                                              | Authority                    |
|-----|-----|----------------------------|-------------------------------------------------------------------------------------------|------------------------------|
| 371 | 129 | Jungermannia pinnatifolia  | <i>Schistochila pinnatifolia</i> (Hook.) Steph.                                           | Hodgson (1942)               |
| 372 | 130 | Jungermannia Billardieri   | <i>Heteroscyphus billardieri</i> (Schwägr.) Schiffn.                                      | NTA                          |
| 373 | 131 | Jungermannia sinuosa       | <i>Heteroscyphus sinuosus</i> (Hook.) Schiffn.                                            | NTA                          |
| 374 | 132 | Jungermannia coalita       | <i>Heteroscyphus coalitus</i> (Hook.) Schiffn.                                            | NTA                          |
| 375 | 133 | Jungermannia squarrosa     | <i>Chandonanthus squarrosus</i> (Hook.) Mitt. ex Schiffn.                                 | Engel & Glenny (2008 p. 641) |
| 376 | 134 | Jungermannia nobilis       | <i>Schistochila nobilis</i> (Hook.) Steph.                                                | Hodgson (1942)               |
| 377 | 135 | Jungermannia glaucescens   | <i>Schistochila glaucescens</i> (Hook.) Steph.                                            | Hodgson (1942)               |
| 378 | 136 | Jungermannia lanata        | <i>Leiomitra lanata</i> (Hook.) R.M.Schust.                                               | Engel & Glenny (2008 p. 176) |
| 379 | 137 | Jungermannia flagellifera  | <i>Dendromastigophora flagellifera</i> (Hook.) R.M.Schust.                                | NTA                          |
| 380 | 138 | Jungermannia appendiculata | <i>Schistochila appendiculata</i> (Hook.) Steph.                                          | Hodgson (1942)               |
| 381 | 139 | Jungermannia tomentella    | <i>Trichocolea</i> sp. indet.                                                             |                              |
| 382 | 140 | Jungermannia pulchella     | <i>Temnoma pulchellum</i> (Hook.) Mitt.                                                   | Engel & Glenny (2008 p. 151) |
| 383 | 141 | Jungermannia pendulina     | <i>Lepidozia pendulina</i> (Hook.) Lindenb.                                               | Engel & Glenny (2008 p. 206) |
| 384 | 142 | Jungermannia microphylla   | <i>Lepidozia microphylla</i> (Hook.) Lindenb.                                             | Engel & Glenny (2008 p. 204) |
| 385 | 144 | Jungermannia clavigera     | <i>Lepidolaena clavigera</i> (Hook.) Trev. ex Dumort.                                     | Hodgson (1959)               |
| 386 | 143 | Jungermannia palpebrifolia | <i>Lepidolaena palpebrifolia</i> (Hook.) Trev. ex Dumort.                                 | Hodgson (1959)               |
| 387 | 145 | Jungermannia Phyllanthus   | <i>Podomitrium phyllanthus</i> (Hook.) Mitt.                                              | NTA                          |
| 388 | 146 | Jungermannia flabellata    | <i>Hymenophyton flabellatum</i> (Labill.) Trevis                                          | NTA                          |
| 389 | 147 | Jungermannia Hymenophyllum | <i>Symphogyna hymenophyllum</i> (Hook.) Mont. & Nees                                      | NTA                          |
| 390 | 148 | Jungermannia eriocaulae    | <i>Riccardia eriocaula</i> (Hook.) C.Massal.                                              | NTA                          |
| 391 | 149 | Anthoceros giganteus       | <i>Nothoceros giganteus</i> (Lehm. & Lindenb.) Haseg. ex J.C.Villarreal, Hässel & Salazar | NTA                          |
| 392 | 150 | Marchantia [polymorpha]    | <i>Marchantia polymorpha</i> L. sens. lat.                                                | NTA                          |
| 393 | 151 | Tmesipteris Forsterii      | <i>Tmesipteris tannensis</i> (Spreng.) Bernh.                                             | Chinnock (1975); FNZO        |
| 394 | 152 | Lycopodium Lessonianum     | <i>Lycopodium scariosum</i> G.Forst.                                                      | FNZO                         |
| 395 | 153 | Lycopodium densum          | <i>Lycopodium deuterodensum</i> Herter                                                    | FNZO                         |
| 396 | 154 | Lycopodium cernuum         | <i>Lycopodiella cernua</i> (L.) Pic.Serm.                                                 | FNZO                         |
| 397 | 155 | Lycopodium Flagellaria     | <i>Phlegmariurus varius</i> (R.Br.) A.R.Field & Bostock                                   | FNZO                         |
| 398 | 156 | Lycopodium laterale        | <i>Lycopodiella lateralis</i> (R.Br.) B.Øllg.                                             | FNZO                         |
| 399 | 157 | Lycopodium Phlegmaria      | <i>Phlegmariurus varius</i> (R.Br.) A.R.Field & Bostock                                   | Hooker (1854, p. 56)         |
| 400 | 158 | Lycopodium volubile        | <i>Lycopodium volubile</i> G.Forst.                                                       | FNZO                         |
| 401 | 159 | Lycopodium D'Urvillaei     | <i>Lycopodium volubile</i> G.Forst.                                                       | FNZO                         |
| 402 | 160 | Botrychium australe        | <i>Botrychium australe</i> R.Br.                                                          | FNZO                         |

| G # | P # | Historic name               | Current name                                            | Authority                                    |
|-----|-----|-----------------------------|---------------------------------------------------------|----------------------------------------------|
| 403 | 161 | Ophioglossum coriaceum      | <i>Ophioglossum coriaceum</i> A.Cunn.                   | FNZO                                         |
| 404 | 162 | Ophioglossum elongatum      | <i>Ophioglossum petiolatum</i> Hook.                    | FNZO                                         |
| 405 | 163 | Gleichenia hecystophylla    | <i>Gleichenia dicarpa</i> R.Br.                         | FNZO                                         |
| 406 | 164 | Gleichenia flabellata       | <i>Sticherus flabellatus</i> (R.Br.) H.St.John          | FNZO                                         |
| 407 | 165 | Gleichenia Hermanii         | <i>Dicranopteris linearis</i> (Burm.f.) Underw.         | FNZO                                         |
| 408 |     | Gleichenia arachnoidea      | <i>Sticherus cunninghamii</i> (Heward ex Hook.) Ching   | FNZO                                         |
| 409 | 166 | Todea pellucida             | <i>Leptopteris hymenophylloides</i> (A.Rich.) C.Presl   | FNZO                                         |
|     |     | Todea superba               | <i>Leptopteris superba</i> (Colenso) C.Presl            | FNZO                                         |
| 410 | 167 | Lygodium articulatum        | <i>Lygodium articulatum</i> A.Rich.                     | FNZO                                         |
| 411 | 168 | Schizaea propinqua          | <i>Schizaea fistulosa</i> Labill.                       | FNZO                                         |
| 412 | 169 | Schizaea bifida             | <i>Schizaea bifida</i> Willd.                           | FNZO                                         |
| 413 | 170 | Schizaea dichotoma          | <i>Schizaea dichotoma</i> (L.) Sm.                      | FNZO                                         |
| 414 | 171 | Grammitis scolopendria      | <i>Notogrammitis billardieri</i> (Willd.) Parris        | Hooker (1854, p. 44); Perrie & Parris (2012) |
| 415 | 172 | Grammitis australis         | <i>Notogrammitis billardieri</i> (Willd.) Parris        | Perrie & Parris (2012)                       |
|     |     | Grammitis ciliata           | <i>Notogrammitis ciliata</i> (Colenso) Parris           | Perrie & Parris (2012)                       |
|     |     | Gymnogramma Novae Zelandiae | <i>Anogramma leptophylla</i> (L.) Link                  | FNZO                                         |
| 416 | 173 | Polypodium attenuatum       | <i>Loxogramme dictyopteris</i> (Mett.) Copel.           | Allan (1961, p. 45); FNZO                    |
| 417 | 174 | Polypodium Billardieri      | <i>Microsorium pustulatum</i> (G.Forst.) Copel.         | FNZO                                         |
| 418 | 175 | Polypodium pustulatum       | <i>Microsorium pustulatum</i> (G.Forst.) Copel.         | FNZO                                         |
| 419 | 176 | Polypodium tenellum         | <i>Arthropteris tenella</i> (G.Forst.) J.Sm. ex Hook.f. | FNZO                                         |
| 420 | 177 | Polypodium grammitidis      | <i>Notogrammitis heterophylla</i> (Labill.) Parris      | Perrie & Parris (2012)                       |
|     |     | Polypodium sylvaticum       | <i>Polystichum sylvaticum</i> (Colenso) Diels           | FNZO                                         |
|     |     | Polypodium viscidum         | <i>Hypolepis rufobarbata</i> (Colenso) N.A.Wakef.       | Brownsey & Chinnock (1984)                   |
| 421 | 178 | Niphobolus rupestris        | <i>Pyrrosia eleagnifolia</i> (Bory) Hovenkamp           | Hooker (1854, p. 44); FNZO                   |
| 422 | 179 | Niphobolus bicolor          | <i>Pyrrosia eleagnifolia</i> (Bory) Hovenkamp           | Hooker (1854, p. 44); FNZO                   |
| 423 | 180 | Lomaria lanceolata          | <i>Blechnum chambersii</i> Tindale                      | FNZO                                         |
|     |     | Lomaria heterophylla        | <i>Blechnum colensoi</i> (Hook.f.) N.A.Wakef.           | FNZO                                         |
|     |     | Lomaria deflexa             | <i>Blechnum vulcanicum</i> (Blume) Kuhn                 | FNZO                                         |
|     |     | Lomaria deltoides           | <i>Blechnum vulcanicum</i> (Blume) Kuhn                 | FNZO                                         |
|     |     | Lomaria Banksii             | <i>Blechnum blechnoides</i> (Bory) Keyserl.             | FNZO                                         |
| 424 | 181 | Lomaria discolor            | <i>Blechnum discolor</i> (G.Forst.) Keyserl.            | FNZO                                         |
| 425 | 182 | Lomaria procera             | <i>Blechnum procerum</i> (G.Forst.) Sw.                 | FNZO                                         |

| G # | P # | Historic name            | Current name                                                                 | Authority           |
|-----|-----|--------------------------|------------------------------------------------------------------------------|---------------------|
| 426 | 183 | Lomaria filiformis       | <i>Blechnum filiforme</i> (A.Cunn.) Ettingsh.                                | FNZO                |
| 427 | 184 | Lomaria propinqua        | <i>Blechnum filiforme</i> (A.Cunn.) Ettingsh.                                | FNZO                |
| 428 | 185 | Lomaria Fraserii         | <i>Blechnum fraseri</i> (A.Cunn.) Luer.                                      | FNZO                |
| 429 |     | Lomaria crenulata        | <i>Blechnum minus</i> (R.Br.) Ettingsh.                                      |                     |
| 430 |     | Lomaria gigantea         | <i>Blechnum novae-zelandiae</i> T.C.Chambers & P.A.Farrant                   |                     |
|     |     | Lomaria polymorpha       | <i>Blechnum filiforme</i> (A.Cunn.) Ettingsh.                                | Hooker (1844); FNZO |
|     |     | Lomaria latifolia        | <i>Blechnum procerum</i> (G.Forst.) Sw.                                      | FNZO                |
|     |     | Lomaria linearis         | <i>Blechnum penna-marina</i> subsp. <i>alpina</i> T.C.Chambers & P.A.Farrant | FNZO                |
|     |     | Lomaria nigra            | <i>Blechnum nigrum</i> (Colenso) Mett.                                       | FNZO                |
| 431 | 186 | Allantodia tenera        | <i>Diplazium australe</i> (R.Br.) N.A.Wakef.                                 | FNZO                |
| 433 | 187 | Asplenium falcatum       | <i>Asplenium polyodon</i> G.Forst.                                           | FNZO                |
| 433 | 188 | Asplenium polyodon       | <i>Asplenium polyodon</i> G.Forst.                                           | FNZO                |
| 434 | 189 | Asplenium lucidum        | <i>Asplenium oblongifolium</i> Colenso                                       | FNZO                |
| 435 | 190 | Asplenium obliquum       | <i>Asplenium obtusatum</i> G.Forst.                                          | FNZO                |
| 436 | 191 | Asplenium obtusatum      | <i>Asplenium obtusatum</i> G.Forst.                                          | FNZO                |
| 437 | 192 | Asplenium flabellifolium | <i>Asplenium flabellifolium</i> Cav.                                         | FNZO                |
| 438 | 193 | Asplenium bulbiferum     | <i>Asplenium bulbiferum</i> G.Forst.                                         | FNZO                |
|     |     | Asplenium Forsterianum   | <i>Asplenium polyodon</i> G.Forst.                                           | FNZO                |
|     |     | Asplenium Hookerianum    | <i>Asplenium hookerianum</i> Colenso                                         | FNZO                |
|     |     | Asplenium Colensoi       | <i>Asplenium hookerianum</i> Colenso                                         | FNZO                |
| 439 | 194 | Caenopteris flaccida     | <i>Asplenium flaccidum</i> G.Forst.                                          | FNZO                |
| 440 | 195 | Doodia aspera            | <i>Blechnum parrisiae</i> Christenh.                                         | Parris (1972); FNZO |
| 441 | 196 | Doodia caudata           | <i>Blechnum molle</i> (Parris) Christenh.                                    | Parris (1980); FNZO |
| 442 | 197 | Doodia Kunthiana         | <i>Blechnum parrisiae</i> Christenh.                                         | Parris (1972); FNZO |
| 443 | 198 | Pteris rotundifolia      | <i>Pellaea rotundifolia</i> (G.Forst.) Hook.                                 | FNZO                |
| 444 | 199 | Pteris comans            | <i>Pteris comans</i> G.Forst.                                                | FNZO                |
| 445 | 200 | Pteris esculenta         | <i>Pteridium esculentum</i> (G.Forst.) Cockayne                              | FNZO                |
| 446 | 201 | Pteris affinis           | <i>Pteris tremula</i> R.Br.                                                  | FNZO                |
| 447 | 202 | Pteris macilenta         | <i>Pteris macilenta</i> A.Rich.                                              | FNZO                |
| 448 | 203 | Pteris Brunoniana        | <i>Histiopteris incisa</i> (Thunb.) J.Sm.                                    | FNZO                |
| 449 | 204 | Pteris scaberula         | <i>Paesia scaberula</i> (A.Rich.) Kuhn                                       | FNZO                |
| 450 | 205 | Pteris tenuis            | <i>Pteris tremula</i> R.Br.                                                  | FNZO                |

| G # | P # | Historic name                              | Current name                                                 | Authority                                  |
|-----|-----|--------------------------------------------|--------------------------------------------------------------|--------------------------------------------|
| 451 | 206 | Pteris microphylla                         | <i>Paesia scaberula</i> (A.Rich.) Kuhn                       | FNZO                                       |
|     |     | Pteris montana                             | <i>Histiopteris incisa</i> (Thunb.) J.Sm.                    | FNZO                                       |
| 452 | 207 | Adiantum affine                            | <i>Adiantum cunninghamii</i> Hook.                           | Allan (1961, p. 99); FNZO                  |
| 453 | 208 | Adiantum formosum                          | <i>Adiantum formosum</i> R.Br.                               | FNZO                                       |
| 454 | 209 | Adiantum hispidulum                        | <i>Adiantum hispidulum</i> Sw.                               | FNZO                                       |
|     |     | Adiantum falcatum                          | <i>Adiantum</i> sp. indet.                                   |                                            |
|     |     | Adiantum assimile                          | <i>Adiantum aethiopicum</i> L.                               | FNZO                                       |
| 455 | 210 | Cheilanthes tenuifolia                     | <i>Cheilanthes austrotenuifolia</i> H.M.Quirk & T.C.Chambers | Quirk et al. (1983); FNZO                  |
| 456 | 211 | Cheilanthes ambigua                        | <i>Hypolepis ambigua</i> (A.Rich.) Brownsey & Chinnock       | FNZO                                       |
|     |     | Cheilanthes pellucida                      | <i>Hypolepis dicksonioides</i> (Endl.) Hook.                 | FNZO                                       |
| 457 | 212 | Lindsaea Lessonii                          | <i>Lindsaea trichomanoides</i> Dryand.                       | FNZO                                       |
| 458 | 213 | Lindsaea linearis                          | <i>Lindsaea linearis</i> Sw.                                 | FNZO                                       |
| 459 | 214 | Lindsaea trichomanoides ('trichomenoides') | <i>Lindsaea trichomanoides</i> Dryand.                       | FNZO                                       |
|     |     | Lindsaea viridis                           | <i>Lindsaea viridis</i> Colenso                              | FNZO                                       |
| 460 | 215 | Loxsoma Cunninghamii                       | <i>Loxsoma cunninghamii</i> R.Br. ex Hook.                   | FNZO                                       |
|     |     | Davallia Novae Zealandiae                  | <i>Leptolepia novae-zelandiae</i> (Colenso) Mett. ex Diels   | FNZO                                       |
| 461 | 216 | Dicksonia squarrosa                        | <i>Dicksonia squarrosa</i> (G.Forst.) Sw.                    | FNZO                                       |
|     |     | Dicksonia fibrosa                          | <i>Dicksonia fibrosa</i> Colenso                             | FNZO                                       |
|     |     | Dicksonia lanata                           | <i>Dicksonia lanata</i> Colenso                              | FNZO                                       |
| 462 | 217 | Aspidium pennigerum                        | <i>Pneumatopteris pennigera</i> (G.Forst.) Holttum           | FNZO                                       |
| 463 | 218 | Aspidium vestitum                          | <i>Polystichum vestitum</i> (G.Forst.) C.Presl               | FNZO                                       |
| 464 | 219 | Aspidium serra                             | † <i>Thelypteris serra</i> (Sw.) R. St. John                 | Hooker (1854, p. 40); Tryon & Tryon (1982) |
| 465 | 220 | Aspidium proliferum                        | <i>Polystichum vestitum</i> (G.Forst.) C.Presl               | Hooker (1854, p. 38); FNZO                 |
| 466 | 221 | Aspidium hispidum                          | <i>Lastreopsis hispida</i> (Sw.) Tindale                     | FNZO                                       |
| 467 | 222 | Aspidium velutinum                         | <i>Lastreopsis velutina</i> (A.Rich.) Tindale                | FNZO                                       |
| 468 | 223 | Aspidium coriaceum                         | <i>Rumohra adiantiformis</i> (G.Forst.) Ching                | FNZO                                       |
|     |     | Aspidium Cunninghamianum                   | <i>Rumohra adiantiformis</i> (G.Forst.) Ching                | FNZO                                       |
|     |     | Aspidium Waikarense                        | <i>Polystichum vestitum</i> (G.Forst.) C.Presl               | FNZO                                       |
|     |     | Aspidium pulcherrimum                      | <i>Polystichum vestitum</i> (G.Forst.) C.Presl               | FNZO                                       |
| 469 | 224 | Nephrodium glabellum                       | <i>Lastreopsis glabella</i> (A.Cunn.) Tindale                | FNZO                                       |
| 470 | 225 | Nephrodium molle                           | <i>Christella dentata</i> (Forssk.) Brownsey & Jermy         | FNZO                                       |
| 471 | 226 | Cyathea dealbata                           | <i>Cyathea dealbata</i> (G.Forst.) Sw.                       | FNZO                                       |



| G # | P # | Historic name                         | Current name                                          | Authority                   |
|-----|-----|---------------------------------------|-------------------------------------------------------|-----------------------------|
| 472 | 227 | Cyathea medullaris                    | <i>Cyathea medullaris</i> (G.Forst.) Sw.              | FNZO                        |
| 473 | 228 | Trichomanes reniforme ('Trichomenes') | <i>Hymenophyllum nephrophyllum</i> Ebihara & K.Iwats. | FNZO                        |
| 474 | 229 | Trichomanes venosum                   | <i>Trichomanes venosum</i> R.Br.                      | FNZO                        |
| 475 | 230 | Trichomanes strictum                  | <i>Trichomanes strictum</i> Menzies ex Hook. & Grev.  | FNZO                        |
| 476 | 231 | Trichomanes elongatum                 | <i>Trichomanes elongatum</i> A.Cunn.                  | FNZO                        |
| 477 | 232 | Trichomanes leptophyllum              | <i>Trichomanes strictum</i> Menzies ex Hook. & Grev.  | FNZO                        |
| 478 | 233 | Hymenophyllum dilatatum               | <i>Hymenophyllum dilatatum</i> (G.Forst.) Sw.         | FNZO                        |
| 479 | 234 | Hymenophyllum sanguinolentum          | <i>Hymenophyllum sanguinolentum</i> (G.Forst.) Sw.    | FNZO                        |
| 480 | 235 | Hymenophyllum scabrum                 | <i>Hymenophyllum scabrum</i> A.Rich.                  | FNZO                        |
| 481 | 237 | Hymenophyllum tortuosum               | † <i>Hymenophyllum tortuosum</i> Hook. & Grev.        | FNZO                        |
| 482 | 236 | Hymenophyllum nitens                  | <i>Hymenophyllum flabellatum</i> Labill.              | FNZO                        |
| 483 | 238 | Hymenophyllum flexuosum               | <i>Hymenophyllum flexuosum</i> A.Cunn.                | FNZO                        |
| 484 | 239 | Hymenophyllum secundum                | † <i>Hymenophyllum secundum</i> Hook. et Grev.        | FNZO                        |
| 485 | 240 | Hymenophyllum multifidum              | <i>Hymenophyllum multifidum</i> (G.Forst.) Sw.        | FNZO                        |
| 486 | 241 | Hymenophyllum semibivalve             | <i>Hymenophyllum rarum</i> R.Br.                      | FNZO                        |
| 487 | 242 | Hymenophyllum minimum                 | <i>Hymenophyllum minimum</i> A.Rich.                  | FNZO                        |
| 488 | 243 | Hymenophyllum Tunbridgense            | <i>Hymenophyllum revolutum</i> Colenso                | Hooker (1854, p. 31); FNZO  |
| 489 | 244 | Hymenophyllum bivalve                 | <i>Hymenophyllum bivalve</i> (G.Forst.) Sw.           | FNZO                        |
| 490 | 245 | Hymenophyllum demissum ('dimissum')   | <i>Hymenophyllum demissum</i> (G.Forst.) Sw.          | FNZO                        |
|     |     | Hymenophyllum imbricatum              | <i>Hymenophyllum rarum</i> R.Br.                      | FNZO                        |
|     |     | Hymenophyllum atrovirens              | <i>Hymenophyllum australe</i> Willd.                  | FNZO                        |
|     |     | Hymenophyllum Franklinianum           | <i>Hymenophyllum frankliniae</i> Colenso              | FNZO                        |
|     |     | Hymenophyllum revolutum               | <i>Hymenophyllum revolutum</i> Colenso                | FNZO                        |
|     |     | Hymenophyllum pulcherrimum            | <i>Hymenophyllum pulcherrimum</i> Colenso             | FNZO                        |
|     |     | Hymenophyllum spathulatum             | <i>Hymenophyllum bivalve</i> (G.Forst.) Sw.           | FNZO                        |
|     |     | Notholaena distans ('Nothoclaena')    | <i>Cheilanthes distans</i> (R.Br.) Mett.              | FNZO                        |
|     |     | Hymenophyllum villosum                | <i>Hymenophyllum villosum</i> Colenso                 | FNZO                        |
| 491 | 246 | Agrostis crinita                      | <i>Dichelachne crinita</i> (L.f.) Hook.f.             | Hooker (1853, p. 293); FNZO |
| 492 | 247 | Agrostis ovata                        | <i>Echinopogon ovatus</i> (G.Forst.) P.Beauv.         | FNZO                        |
| 493 | 248 | Agrostis rigida                       | <i>Anemanthele lessoniana</i> (Steud.) Veldkamp       | FNZO                        |
| 494 | 249 | Agrostis procera                      | <i>Anemanthele lessoniana</i> (Steud.) Veldkamp       | FNZO                        |
| 495 | 250 | Agrostis conspicua                    | <i>Chionochloa conspicua</i> (G.Forst.) Zotov         | FNZO                        |

| G # | P # | Historic name                         | Current name                                                                            | Authority                           |
|-----|-----|---------------------------------------|-----------------------------------------------------------------------------------------|-------------------------------------|
| 496 | 251 | Agrostis aemula                       | <i>Lachnagrostis filiformis</i> (G.Forst.) Trin.                                        | Edgar & Connor (2000, p. 271); FNZO |
| 497 | 252 | Agrostis Billardieri                  | <i>Lachnagrostis billardierei</i> (R.Br.) Trin. subsp. <i>billardierei</i>              | FNZO                                |
| 498 | 253 | Agrostis Forsteri                     | <i>Lachnagrostis filiformis</i> (G.Forst.) Trin.                                        | FNZO                                |
| 499 | 254 | Agrostis pilosa                       | <i>Lachnagrostis pilosa</i> (Buchanan) Edgar                                            | FNZO                                |
| 500 | 255 | Phalaris canariensis                  | * <i>Phalaris canariensis</i> L.                                                        | FNZO                                |
| 501 | 256 | Danthonia pallida                     | <i>Trisetum antarcticum</i> (G.Forst.) Trin.                                            | Hooker (1853, p. 301); FNZO         |
| 502 | 257 | Avena Antarctica                      | <i>Trisetum antarcticum</i> (G.Forst.) Trin.                                            | FNZO                                |
| 503 | 258 | Bromus australis                      | <i>Bromus arenarius</i> Labill.                                                         | Hooker (1853, p. 310); FNZO         |
| 504 | 259 | Schenodorus littoralis                | <i>Poa billardierei</i> (Spreng.) St.-Yves                                              | FNZO                                |
| 505 | 260 | Triticum scabrum                      | <i>Anthosachne kingiana</i> subsp. <i>multiflora</i> (Banks & Sol. ex Hook.f.) Govaerts | Hooker (1853, p. 311); FNZO         |
| 506 | 261 | Triticum repens                       | <i>Anthosachne kingiana</i> subsp. <i>multiflora</i> (Banks & Sol. ex Hook.f.) Govaerts | Hooker (1853, p. 311); FNZO         |
| 507 | 262 | Poa australis                         | <i>Poa anceps</i> G.Forst. subsp. <i>anceps</i>                                         | Hooker (1853, p. 306); FNZO         |
| 508 | 263 | Poa imbecilla                         | <i>Poa imbecilla</i> Spreng.                                                            | FNZO                                |
| 509 | 264 | Poa caespitosa                        | <i>Poa cita</i> Edgar                                                                   | FNZO                                |
| 510 | 265 | Arundo australis                      | <i>Austroderia richardii</i> (Endl.) N.P.Barker & H.P.Linder                            | FNZO                                |
| 511 | 266 | Paspalum orbiculare                   | <i>Paspalum orbiculare</i> G.Forst.                                                     | FNZO                                |
| 512 | 267 | Rottboellia uniflora ('Rottbocellia') | <i>Paspalum vaginatum</i> Sw.                                                           | FNZO                                |
| 513 | 268 | Spinifex sericeus                     | <i>Spinifex sericeus</i> R.Br.                                                          | FNZO                                |
| 514 | 269 | Torresia redolens                     | <i>Hierochloe redolens</i> (Vahl) Roem. & Schult.                                       | FNZO                                |
| 515 | 270 | Cyperus ustulatus                     | <i>Cyperus ustulatus</i> A.Rich.                                                        | FNZO                                |
| 516 | 271 | Fuirena rubigenosa                    | <i>Machaerina rubiginosa</i> (Spreng.) T.Koyama                                         | FNZO                                |
| 517 | 272 | Isolepis nodosa                       | <i>Ficinia nodosa</i> (Rottb.) Goetgh., Muasya & D.A.Simpson                            | FNZO                                |
| 518 | 273 | Isolepis setacea                      | <i>Isolepis cernua</i> (Vahl) Roem. & Schult.                                           | Moore & Edgar (1970, p. 171); FNZO  |
| 519 | 274 | Isolepis spiralis                     | <i>Ficinia spiralis</i> (A.Rich.) Muasya & de Lange                                     | FNZO                                |
| 520 | 275 | Scirpus lacustris                     | <i>Schoenoplectus tabernaemontani</i> (C.C.Gmel.) Palla                                 | Moore & Edgar (1970, p. 175); FNZO  |
| 521 | 276 | Vauthiera australis ('Vauthera')      | <i>Lepidosperma australe</i> (A.Rich.) Hook.f.                                          | FNZO                                |
| 522 | 277 | Elaeocharis sphacelata                | <i>Elaeocharis sphacelata</i> R.Br.                                                     | FNZO                                |

| G # | P # | Historic name          | Current name                                                           | Authority                                               |
|-----|-----|------------------------|------------------------------------------------------------------------|---------------------------------------------------------|
| 523 | 278 | Elaeocharis acicularis | <i>Elaeocharis sphacelata</i> R.Br.                                    | Moore & Edgar (1970, p. 189);<br>FNZO                   |
| 524 | 279 | Schoenus imberbis      | <i>Schoenus apogon</i> Roem. & Schult. var. <i>apogon</i>              | FNZO                                                    |
| 525 | 280 | Lepidosperma elatior   | <i>Lepidosperma laterale</i> R.Br.                                     | Hooker (1853, p. 279);<br>Cheeseman (1906, p. 790)      |
| 526 | 281 | Lampocarya lacera      | <i>Gahnia lacera</i> (A.Rich.) Steud.                                  | FNZO                                                    |
| 527 | 282 | Lampocarya setifolia   | <i>Gahnia setifolia</i> (A.Rich.) Hook.f.                              | FNZO                                                    |
| 528 | 283 | Lampocarya affinis     | <i>Morelotia affinis</i> (Brongn.) S.T.Blake                           | FNZO                                                    |
| 529 | 284 | Gahnia procera         | <i>Gahnia procera</i> J.R.Forst. & G.Forst.                            | FNZO                                                    |
| 530 | 286 | Uncinia australis      | <i>Carex uncinata</i> L.f.                                             | FNZO                                                    |
| 531 | 287 | Carex polystachia      | <i>Carex lessoniana</i> Steud.                                         | Moore & Edgar (1970, p. 272);<br>FNZO                   |
| 532 | 288 | Carex punctulata       | <i>Carex forsteri</i> Wahlenb.                                         | FNZO                                                    |
| 533 | 289 | Carex recurva          | <i>Carex forsteri</i> Wahlenb.                                         | FNZO                                                    |
| 534 | 290 | Carex geminata         | <i>Carex geminata</i> Schkuhr                                          | FNZO                                                    |
| 535 | 285 | Morelotia Gahnaeformis | <i>Morelotia affinis</i> (Brongn.) S.T.Blake                           | FNZO                                                    |
| 536 | 291 | Leptocarpus simplex    | <i>Apodasmia similis</i> (Edgar) B.G.Briggs & L.A.S.Johnson            | FNZO                                                    |
| 537 | 292 | Juncus maritimus       | <i>Juncus kraussii</i> subsp. <i>australiensis</i> (Buchenau) Snogerup | Healy & Edgar (1980, p. 99);<br>FNZO                    |
| 538 | 293 | Juncus effusus         | <i>Juncus edgariae</i> L.A.S.Johnson & K.L.Wilson                      | Moore & Edgar (1970, p. 59);<br>Johnson & Wilson (2000) |
| 539 | 294 | Juncus filiformis      | † <i>Juncus filiformis</i> L.                                          | Moore & Edgar (1970, p. 69)                             |
| 540 | 295 | Luzula picta           | <i>Luzula picta</i> A.Rich.                                            | FNZO                                                    |
| 541 | 296 | Astelia Banksii        | <i>Astelia banksii</i> A.Cunn.                                         | FNZO                                                    |
| 542 | 297 | Astelia Solandrii      | <i>Astelia solandri</i> A.Cunn.                                        | FNZO                                                    |
| 543 | 298 | Areca sapida           | <i>Rhopalostylis sapida</i> (Sol. ex Hook.f.) H.Wendl. & Drude         | Beccari (1916)                                          |
| 544 | 299 | Arthropodium cirrhatum | <i>Arthropodium cirratum</i> (G.Forst.) R.Br.                          | FNZO                                                    |
| 545 | 300 | Dianella intermedia    | <i>Dianella nigra</i> Colenso                                          | FNZO                                                    |
| 546 | 301 | Dracaena indivisa      | <i>Cordyline indivisa</i> (G.Forst.) Endl.                             | FNZO                                                    |
| 547 | 302 | Cordyline australis    | <i>Cordyline australis</i> (G.Forst.) Endl.                            | FNZO                                                    |
| 548 | 303 | Cordyline stricta      | <i>Cordyline pumilio</i> Hook.f.                                       | Hooker (1864, p. 282)                                   |
| 549 | 304 | Phormium tenax         | <i>Phormium tenax</i> J.R.Forst. & G.Forst.                            | FNZO                                                    |
| 550 | 305 | Ripogonum parviflorum  | <i>Ripogonum scandens</i> J.R.Forst. & G.Forst.                        | FNZO                                                    |

| G # | P # | Historic name                      | Current name                                                               | Authority                            |
|-----|-----|------------------------------------|----------------------------------------------------------------------------|--------------------------------------|
| 551 | 306 | Libertia grandiflora               | <i>Libertia grandiflora</i> (R.Br.) Sweet                                  | FNZO                                 |
| 552 | 307 | Libetia ixioides                   | <i>Libertia ixioides</i> (G.Forst.) Spreng.                                | FNZO                                 |
| 553 | 308 | Libertia micrantha                 | <i>Libertia micrantha</i> A.Cunn.                                          | FNZO                                 |
| 554 | 309 | Thelymitra Forsterii               | <i>Thelymitra longifolia</i> J.R.Forst. & G.Forst.                         | FNZO                                 |
| 555 | 310 | Orthoceras Strictum                | <i>Orthoceras novae-zeelandiae</i> (A.Rich.) M.A.Clem., D.L.Jones & Molloy |                                      |
| 556 | 311 | Microtis Banksii                   | <i>Microtis unifolia</i> (G.Forst.) Rchb.f.                                | FNZO                                 |
| 557 | 312 | Acianthus rivularis                | <i>Corybas rivularis</i> (A.Cunn.) Rchb.f.                                 | FNZO                                 |
| 558 | 313 | Pterostylis Banksii                | <i>Pterostylis banksii</i> A.Cunn.                                         | FNZO                                 |
| 559 | 314 | Gastrodia sesamoides               | <i>Gastrodia sesamoides</i> R.Br.                                          | FNZO                                 |
| 560 |     | Cyrtostylis reniformis             | <i>Cyrtostylis rotundifolia</i> Hook.f.                                    | FNZO                                 |
| 561 |     | Pterostylis collina                | <i>Pterostylis trullifolia</i> Hook.f.                                     |                                      |
| 562 |     | Caladenia                          | Orchidaceae gen. et sp. indet.                                             |                                      |
| 563 |     | Acianthus fornicatus               | <i>Acianthus sinclairii</i> Hook.f.                                        |                                      |
| 564 | 315 | Earina mucronata                   | <i>Earina mucronata</i> Lindl.                                             | FNZO                                 |
| 565 | 316 | Dendrobium Cunninghamii            | <i>Dendrobium cunninghamii</i> Lindl.                                      | FNZO                                 |
| 566 | 317 | Bolbophyllum pygmaeum              | <i>Bulbophyllum pygmaeum</i> (Sm.) Lindl.                                  | FNZO                                 |
| 567 |     | Sarcochilus                        | <i>Drymoanthus adversus</i> (Hook.f.) Dockrill                             |                                      |
|     |     | Thelymitra grandiflora             | <i>Thelymitra</i> sp. indet.                                               |                                      |
|     |     | Thelymitra straminea               | <i>Thelymitra</i> sp. indet.                                               |                                      |
|     |     | Thelymitra lineata                 | <i>Thelymitra</i> sp. indet.                                               |                                      |
| 568 | 318 | Caladium esculentum                | * <i>Colocasia esculenta</i> (L.) Schott                                   | Hooker (1864, p. 276)                |
| 569 | 319 | Typha angustifolia                 | <i>Typha orientalis</i> C.Presl                                            | Briggs & Johnson (1968)              |
| 570 | 320 | Freycinetia Banksii ('Freycineta') | <i>Freycinetia banksii</i> A.Cunn.                                         | FNZO                                 |
| 571 | 321 | Triglochin flaccidum               | <i>Triglochin striata</i> Ruiz & Pav.                                      | FNZO                                 |
| 572 | 322 | Potamogeton natans                 | <i>Potamogeton suboblongus</i> Hagstr.                                     | Moore & Edgar (1970, p. 11);<br>FNZO |

**Table 2: Classes covered by Precursor only**

| P # | Historic name     | Current name                    | Authority |
|-----|-------------------|---------------------------------|-----------|
| 1   | Sargassum vulgare | <i>Sargassum pacificum</i> Bory | AB        |

| P # | Historic name                                  | Current name                                                 | Authority                                                |
|-----|------------------------------------------------|--------------------------------------------------------------|----------------------------------------------------------|
| 2   | <i>Sargassum plumosum</i>                      | <i>Carpophyllum plumosum</i> (A.Rich.) J.Agardh              | AB                                                       |
| 3   | <i>Sargassum atlanticum</i>                    | <i>Sargassum pacificum</i> Bory                              | AB                                                       |
| 4   | <i>Sargassum granuliferum</i>                  | † <i>Sargassum granuliferum</i> C.Agardh                     | Hooker (1867, p. 648)                                    |
| 5   | <i>Sargassum droserifolium</i>                 | <i>Sargassum ilicifolium</i> (Turner) C.Agardh               | AB                                                       |
| 6   | <i>Sargassum longifolium</i>                   | † <i>Anthophycus longifolius</i> (Turner) Kützing            | AB                                                       |
| 7   | <i>Sargassum duplicatum</i>                    | <i>Sargassum ilicifolium</i> (Turner) C.Agardh               | Hooker (1867, p. 648)                                    |
| 8   | <i>Sargassum lessonianum</i>                   | <i>Marginariella gigas</i> (A.Rich.) Tandy                   | AB                                                       |
| 9   | <i>Sargassum urvillianum</i>                   | <i>Marginariella urvilliana</i> (A.Rich.) Tandy              | AB                                                       |
| 10  | <i>Sargassum boryanum</i>                      | <i>Marginariella boryana</i> (A.Rich.) Tandy                 | AB                                                       |
| 11  | <i>Turbinaria denudata</i>                     | <i>Turbinaria denudata</i> Bory                              | AB                                                       |
| 12  | <i>Carpophyllum flexuosum</i>                  | <i>Carpophyllum flexuosum</i> (Esper) Grev.                  | AB                                                       |
| 13  | <i>Carpophyllum maschalocarpum</i>             | <i>Carpophyllum maschalocarpum</i> (Turner) Grev.            | AB                                                       |
| 14  | <i>Cystoseira retroflexa</i>                   | <i>Cystophora retroflexa</i> (Labill.) J.Agardh              | AB                                                       |
| 15  | <i>Cystoseira torulosa</i>                     | <i>Cystophora torulosa</i> (R.Br. ex Turner) J.Agardh        | AB                                                       |
| 16  | <i>Cystoseira? quercifolia</i>                 | <i>Platythalia quercifolia</i> (R.Br. ex Turner) Sonder      | AB                                                       |
| 17  | <i>Castraltia salicornioides</i> ('Castralia') | <i>Scaberia agardhii</i> Grev.                               | AB                                                       |
| 18  | <i>Moniliformia billardieri</i>                | <i>Hormosira banksii</i> (Turner) Decne.                     | AB                                                       |
| 19  | <i>Moniliformia sieberi</i>                    | <i>Hormosira banksii</i> (Turner) Decne.                     | AB                                                       |
| 20  | <i>Splachnidium rugosum</i>                    | <i>Splachnidium rugosum</i> (L.) Grev.                       | AB                                                       |
| 21  | <i>Durvillea utilis</i>                        | <i>Durvillaea antarctica</i> (Cham.) Hariot                  | AB                                                       |
| 22  | <i>Macrocystis pyrifera</i>                    | <i>Macrocystis pyrifera</i> (L.) C.Agardh                    | AB                                                       |
| 23  | <i>Macrocystis angustifrons</i>                | <i>Macrocystis pyrifera</i> (L.) C.Agardh                    | AB                                                       |
| 24  | <i>Macrocystis? comosa</i>                     | <i>Phyllospora comosa</i> (Labill.) C.Agardh                 | AB                                                       |
| 25  | <i>Laminaria flabelliformis</i>                | <i>Ecklonia radiata</i> (C.Agardh) J.Agardh                  | AB                                                       |
| 26  | <i>Laminaria biruncinata</i>                   | <i>Ecklonia biruncinata</i> (Bory) Papenfuss                 | AB                                                       |
| 27  | <i>Laminaria radiata</i>                       | <i>Ecklonia radiata</i> (C.Agardh) J.Agardh                  | AB                                                       |
| 28  | <i>Laminaria pygmaea</i>                       | incertae sedis                                               | Hooker & Harvey (1845, p. 528)                           |
| 29  | <i>Amansia multifida</i>                       | † <i>Epineuron lineatum</i> (Turner) Hook.f. & Harvey        | Hooker (1867, p. 663)                                    |
|     | <i>Amansia triangularis</i>                    | † <i>Bryothamnion triquetrum</i> (S.G.Gmelin) M.Howe         | Hooker (1867, p. 663) [as <i>Alsidium triangulare</i> ]) |
| 31  | <i>Rhodomenia corallina</i>                    | possibly <i>Halopeltis australis</i> (J.Agardh) G.W.Saunders | AB                                                       |
| 32  | <i>Rhodomenia chauvinii</i>                    | <i>Chondracanthus chauvinii</i> (Bory) Kützing               | AB                                                       |
| 33  | <i>Rhodomenia? lusoria</i>                     | <i>Pachymenia lusoria</i> (Grev.) J.Agardh                   | AB                                                       |

| P # | Historic name                      | Current name                                                          | Authority                          |
|-----|------------------------------------|-----------------------------------------------------------------------|------------------------------------|
| 34  | Thamnophora corallorhiza           | <i>Plocamium cirrhosum</i> (Turner) M.J.Wynne                         | cf. Hooker & Harvey (1845, p. 542) |
| 35  | Thamnophora cunninghamii           | <i>Plocamium cirrhosum</i> (Turner) M.J.Wynne                         | AB                                 |
| 36  | Plocamium coccineum                | <i>Plocamium leptophyllum</i> Kützinger                               | AB                                 |
| 37  | Plocamium confervaceum             | possibly <i>Plocamium angustum</i> (J.Agardh) Hook.f. & Harvey        | cf. Hooker & Harvey p. 543         |
| 38  | Rhodomela pinastroides             | incertae sedis                                                        | Hooker & Harvey (1845, p. 533)     |
| 39  | Laurencia obtusa                   | <i>Laurencia</i> sp. indet. (perhaps <i>L. botrychioides</i> Harvey?) | Hooker & Harvey 1845, p. 539)      |
| 40  | Laurencia forsteri                 | <i>Laurencia forsteri</i> (Mertens ex Turner) Grev.                   | AB                                 |
| 41  | Laurencia papillosa                | <i>Laurencia</i> sp. indet. (perhaps <i>L. thyrsoifera</i> J.Agardh?) | AB                                 |
| 42  | Chondrus? alveatus                 | <i>Psilophycus alveatus</i> (Turner) W.A.Nelson, Leister & Hommersand | AB                                 |
| 43  | Chondrus abscissus                 | <i>Melanthalia abscissa</i> (Turner) Hook.f. & Harvey                 | AB                                 |
| 44  | Chondrus chondrophyllus            | <i>Xiphophora chondrophylla</i> (R.B. ex Turner) Montagne ex Harvey   | AB                                 |
| 45  | Gelidium corneum                   | <i>Pterocladia capillacea</i> (S.G.Gmelin) Santelices & Hommersand    | Moore (1944, p. 336)               |
| 46  | Hypnea musciformis                 | incertae sedis                                                        | cf. D'Archino et al. (2015)        |
| 47  | Halymenia furcellata               | possibly <i>Scinaia acuta</i> M.J.Wynne                               | AB                                 |
| 48  | Halymenia dubia                    | incertae sedis                                                        | cf. Hooker & Harvey (1845, p. 548) |
| 49  | Parmelia aurea                     | <i>Xanthoria ligulata</i> (Körb.) P.James                             | Galloway (2007, p. 1980)           |
| 50  | Parmelia pulverulenta              | <i>Dirinaria picta</i> (Sw.) Clem. & Shear.                           | auctt.                             |
| 51  | Parmelia linearis                  | <i>Ramalina celastri</i> (Spreng.) Krog & Swinscow                    | auctt.                             |
| 52  | Parmelia perlata                   | <i>Parmotrema perlatum</i> (Huds.) M.Choisy                           | Galloway (2007, p. 1093)           |
| 53  | Cetraria glauca                    | incertae sedis                                                        | Hooker (1867, p. 565)              |
| 54  | Sticta aurata                      | <i>Pseudocyphellaria aurata</i> (Sm.) Vainio                          | Galloway (1985, p. 427)            |
| 55  | Sticta mongeotiana ('mougeotiana') | possibly <i>Pseudocyphellaria neglecta</i> (Müll.Arg.) H.Magn.        | Galloway (2007, p. 1433)           |
| 56  | Sticta latifrons                   | <i>Sticta latifrons</i> A. Rich.                                      | Galloway (1985, p. 557)            |
| 57  | Sticta cinnamomea                  | <i>Pseudocyphellaria cinnamomea</i> (A.Rich.) Vain.                   | Galloway (2007, p. 1393)           |
| 58  | Sticta variabilis                  | <i>Sticta squamata</i> D. Galloway                                    | Galloway (1985, p. 560)            |
| 59  | Sticta filicina                    | <i>Sticta filix</i> (Sw.) Nyl.                                        | Galloway (1985, p. 554)            |
| 60  | Sticta carpoloma                   | <i>Pseudocyphellaria carpoloma</i> (Delise) Vainio                    | Galloway (1985, p. 429)            |
| 61  | Nephroma australe                  | <i>Nephroma australe</i> A. Rich.                                     | Galloway (1985, p. 313)            |



| P # | Historic name            | Current name                                                   | Authority                                            |
|-----|--------------------------|----------------------------------------------------------------|------------------------------------------------------|
| 62  | Cenomyce retipora        | <i>Cladia retipora</i> (Labill.) Nyl.                          | Galloway (2007, p. 341)                              |
| 63  | Cenomyce furcata         | <i>Cladonia furcata</i> (Huds.) Schrad.                        | Galloway (2007, p. 377)                              |
| 64  | Cenomyce rangiferina     | <i>Cladonia</i> spp. possibly incl. <i>C. mitis</i> Sandst.    | cf. Martin (1959)                                    |
| 65  | Cenomyce ecmocyna        | <i>Cladonia</i> spp. incl. <i>C. tenerrima</i> (Ahti) S.Hammer | Galloway (2007, p. 414)                              |
| 66  | Stereocaulon ramulosum   | <i>Stereocaulon ramulosum</i> (Sw.) Räuschel                   | Galloway (1985, p. 548)                              |
| 67  | Stereocaulon macrocarpum | <i>Stereocaulon ramulosum</i> (Sw.) Räuschel                   | Galloway (1985, p. 548)                              |
| 68  | Alectoria crinalis       | possibly <i>Alectoria nigricans</i> (Ach.) Nyl.                | cf. Hooker (1855, p. 269)                            |
| 69  | Ramalina farinacea       | <i>Ramalina celastri</i> (Spreng.) Krog & Swinscow             | auctt.                                               |
| 70  | Cornicularia aculeata    | <i>Cetraria aculeata</i> (Schreb.) Fr.                         | Hooker (1855, p. 271)                                |
| 71  | Usnea cornicularia       | <i>Ramalina australiensis</i> Nyl.                             | Galloway (1985, p.501) then Galloway (2007, p. 1507) |
| 72  | Usnea ceratina           | <i>Usnea</i> spp. incl. <i>U. angulata</i> Ach.                | Galloway (2007, p. 1835)                             |
| 73  | Usnea florida            | <i>Usnea</i> spp. incl. <i>U. angulata</i> Ach.                | Galloway (2007, p. 1835)                             |
| 74  | Collema nigrescens       | <i>Collema leucocarpum</i> J.D. Hook. & Taylor                 | Hooker (1867, p. 557) then Galloway (1985, p. 140)   |
| 75  | Collema tremelloides     | <i>Leptogium azureum</i> (Sw.) Mont.                           | Galloway (1985, p. 250)                              |
| 76  | Caenogonium linkii       | <i>Coenogonium</i> sp., most likely <i>C. implexum</i> Nyl.    | cf. Hooker (1867, p. 581)                            |
