# Supplementary material
Source: publisher figshare collection journal article supplement (https://tandf.figshare.com/articles/dataset/_/5726008)
Supplement: Supplementary file 2 [file 1]

GLOSSARIUM

BOTANICUM:

NOVAE ZELANDIAE

by

William Colenso

Transcript of the manuscript  
State Library of New South Wales,  
Mitchell Library MLMSS 3109

Sydney  
New South Wales  
AUSTRALIA

## Transcriber's notes

This transcript was prepared using 'semi-diplomatic' conventions. In particular:

- Ligatures æ and œ are converted to 'ae' and 'oe'. The letter 'thorn' has been replaced by 'th'. Long 's' has been replaced by short 's'.
- Spelling has not been corrected
- No editorial insertions have been made, and usual indicators of such, e.g. square brackets [] etc are exactly as they are in the original.
- It has been attempted to reproduce line breaks. However, due to the wide variation in writing sizes and irregularity of placement, it was not possible to do that in every case.
- Page sizes have been reproduced as far as possible. Where the manuscript was meant to be read across two pages opened out flat, those pages have been combined into a single wide transcript page.
- Page numbers in serif font are Colenso's. Page numbers in sans-serif are by an unknown collator. Page numbers in these notes refer to the collation numbering.
- Page 125 was not originally part of the manuscript but was bound in between 124 and 127, separating two pages meant to be read as one. In this transcript, p. 125 appears between 123 and 126 so as not to interpose a separation.
- Blank pages, or those with no significant text, are omitted from this transcript. Those pages are: 4, 82-85, 88, 90, 92, 94, 126, 140, 141, 144, 145, 150-154, 159, 160.

C. Earp

March 2016

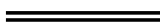

Glossarium  
Botanicum

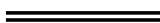

Novae Zelandiae

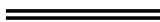

latifa. – broad leaved  
 diosmifol – stonecrop leaved  
 Ligustrifol – privet-leaved  
 angustifol narrow  
 Salicifolia – willow-leaved

Banks of Waiaruhe  
 W. side, Ipomoea  
 Decr. 1839: do do  
 a Coprosma, with  
 repand sinuate  
 leaves – also, Viscum  
salicornioides, near  
 flowg. – say a month  
 hence

42.

“whatever God himself has  
pleased to think worthy of his  
making, its fellow. Creature man  
shod. not think unworthy of his  
knowing” – Boyle

M

Ma

Ma

Ma

Ki

Ki

Te

Ko

ei te

a – glistening

hinaki

taking eels

|           |
|-----------|
| 14 . 0    |
| 3 . 0 . 0 |
| 1 . 6     |
| 2 . 6     |
| 4 . 6     |
| 4 . 0     |

---

---

Glossarium  
Botanicum:

---

Novae Zelandiae.

---

MDCCCXXCVIII.

---

---

First River, this side, on way to Rotorua, a new  
Dracophyllum: seed for Mr Bidwell.

Matamata marshes, a minute fern – ophioglossm.?

Pholas on Waiheke near Maxwell's

Daphne, sea-side

Saw a peculiar plant under a stone, on edge of River  
 right-hand side of roadway above Mr. Kemps, July  
 22/39. (Gentian?)

Decr 31/40. Measured a Fuchsia excorticata at  
 Waikare; Girth, 33 inches; height 25 to 30 ft.

March 8/41. Measured a leaf of Taro Hoia (Caladium  
 Esculentum ? Vent.) at Pihoi – length 33 inches, breadth 23



To Hooker –

No. 10 – pittosp Tawapou

11 petiole-winged fruit (Wairua) Tanekaha

12 mahimahi (Wairua)

13 poataniwa – emarginate

14 puhikawa

15 Laurus Victoriana

16 puka large leaf

[17 little slender weed like Galium]

18 tikumu

19 green leaf of shrub gathd. near Wareora

20 little chenopodm. like thing from the pa, Tongake

21 Hymenllum. next (in app) to H. dilatatum – wood Wangarei

22 Viola

23 Rohutu

24 Toetoe minim. Wairua

25 parapara

26 small Coprosma – like C. rhamnoides

27 Manaoa

28 orchis – falcate epiphyte – hab. of Earina

29 coprosma – variegated leaf, muddy banks of W.

30 small Ranunculus – road to O Taika

31 Santalaceae - Maire

## Exogenous Plants

are those, which exhibit, when viewed transversely, a central cellular substance or pith, an external cellular and fibrous ring or bark, an intermediate woody mass, and certain fine lines radiating from the pith to the bark, through the wood, and called medullary rays – (Lindley's Int. to Bot. p. 59.) –

Ex. Plants always have 2 or more cotyledons - hence Dicotyledons

## Endogenous Plants

(see pp. 116–130,) are those in which neither bark nor pith, nor wood, nor medullary rays are distinguishable; the transverse section exhibits a large number of hard spots caused by the section of bundles of woody tissue, and a mass of cellular substance in which they lie imbedded.

Endog. P. have only 1 cotyledon

|   |           |            |
|---|-----------|------------|
| 1 | Kauri     |            |
| 2 | Tanekaha  |            |
| 3 | Miro      |            |
| 4 | Totara    |            |
| 5 | Mae       | } one tree |
| 6 | Matai     |            |
| 7 | Kawaka    |            |
| 8 | Kahikatea |            |
| 9 | Rimu      |            |
|   | Manoao?   |            |

## Exogenae

Coniferae or Pinaceae 313

|   |                                                         |               |
|---|---------------------------------------------------------|---------------|
| 1 | Dammara Australis                                       | Lambert       |
|   | Taxaceae 316                                            |               |
| 2 | Phyllocladus trichomanoides                             | Brown         |
| 3 | Podocarpus ferruginea                                   | Don.          |
| 4 | Podocarpus                                              | Don.          |
| 5 | Dacrydium                                               | A. Cunningham |
| 6 |                                                         |               |
| 7 | Dacrydium plumosum                                      | Don           |
| 8 | Podocarpus excelsus }<br>Dacrydium taxifolium](Lindley) | Richard       |
| 9 | Dacrydium cupressinum                                   | Solander      |
|   |                                                         | WC            |

|    |             |                                                                                                                         |
|----|-------------|-------------------------------------------------------------------------------------------------------------------------|
| 10 | Kawakawa    |                                                                                                                         |
| 11 |             |                                                                                                                         |
| 12 |             | Cloudy Bay<br>leaves opp. halbert shaped, hearted<br>bristly serrate; racemes in pairs,<br>divaricate; stipules hearted |
| 13 |             | flooded banks: Kkawa river                                                                                              |
| 14 | Parataniwa  | Damp woods: banks, Kkawa.                                                                                               |
| 15 |             | Banks Kkawa; tree 25 p.                                                                                                 |
| 16 | Porokaiwiri | Kkeri river: Tree, 30 p. – red berry                                                                                    |

|    |                                             |               |
|----|---------------------------------------------|---------------|
|    | <u>Piperaceae</u> 185                       |               |
| 10 | Piper excelsum                              | Forster       |
| 11 | Peperomia Urvilliana                        | A. Richard    |
|    | <u>Urticeae</u> 175                         |               |
| 12 | Urtica ferox Linne 1555                     | Willdenow     |
| 13 | U. debilis<br>see Parietaria debilis, Linné | Endlicher     |
|    | <u>Artocarpiae</u> 175                      |               |
| 14 | Elatosemma rugosa                           | A. Cunningham |
| 15 | Hedycaria dentata                           | Forster       |
| 16 | H. scabra                                   | A. Cunningham |

|    |          |                                                                      |
|----|----------|----------------------------------------------------------------------|
| 17 | Aute     | Waremarama Kkawa                                                     |
| 18 | Waiuatua |                                                                      |
| 19 | Maire    | Dark forests, Wangaroa, 15 p.                                        |
| 20 |          | Forests, Wangaroa; bearg. fruit.                                     |
| 21 |          | Woods, Bay Islands.                                                  |
| 22 |          | In fissures of rocks on coast and<br>tops of mountains (F., $\mu$ .) |
| 23 |          |                                                                      |

|    |                                                                                                                   |               |
|----|-------------------------------------------------------------------------------------------------------------------|---------------|
|    | <u>Moreae</u> 175                                                                                                 |               |
| 17 | Broussonetia papyrifera<br>Linné 1557?                                                                            | Willdenow     |
|    | <u>Euphorbiaceae</u> 175                                                                                          |               |
| 18 | Euphorbia glauca                                                                                                  | Forster       |
|    | <u>Santalaceae</u> p. 193                                                                                         |               |
| 19 | Mira salicifolia                                                                                                  | A. Cunningham |
| 20 | M. eucalyptoides                                                                                                  | A. Cunningham |
| 21 | M. myrtifolia                                                                                                     | A. Cunningham |
|    | <u>Thymelae</u> 194                                                                                               |               |
| 22 | Pimelia gnidia<br>leaves oblong-lanceolate, acute,<br>rigid, very smooth; corolla villous on<br>outside ( $\mu$ ) | Vahl.         |
| 23 | P. pilosa<br>hairy, leaves linear obtuse ( $\mu$ )                                                                | Vahl.         |

|    |             |                                                      |
|----|-------------|------------------------------------------------------|
| 24 | Kaikaiatua  | among underwood, shady moist grounds, Bay of Islands |
| 25 | Outatoranga | Sandhills; Heads. Hokianga.                          |
| 26 |             |                                                      |
| 27 |             | Dry hills, Fern; B. Islands.                         |
| 28 | Toru        | see Persoonia, 195 Linne                             |
| 29 | Rewarewa    |                                                      |
| 30 | Taraire     |                                                      |
| 31 | Tawa        |                                                      |
| 32 | Tangeo      |                                                      |
|    | Tawaraunui  |                                                      |

|                       |                                                    |               |
|-----------------------|----------------------------------------------------|---------------|
| 24                    | Pimelia virgata                                    | Vahl.         |
| 25                    | P. arenaria                                        | A. Cunningham |
| 26                    | P. prostrata<br>leaves ovate, sessile, fleshy (μ.) | Vahl.         |
| 27                    | P. Urvilliana                                      | Richard       |
| <u>Proteaceae</u> 197 |                                                    |               |
| 28                    | Personia Toru                                      | A. Cunningham |
| 29                    | Knightia Excelsa                                   | Brown.        |
| <u>Laurinae</u> 200   |                                                    |               |
| 30                    | Laurus Taraire                                     | A Cunningham  |
| 31                    | L. Tawa                                            | A Cunningham  |
| 32                    | L. calicaris<br>in flower, Sep. 3/39 Waikare       | Solander      |
|                       | L. Victoriana                                      | W.C.          |

|    |                                |                                                                    |                          |                                                                                                                                                   |
|----|--------------------------------|--------------------------------------------------------------------|--------------------------|---------------------------------------------------------------------------------------------------------------------------------------------------|
| 33 | Koporokaiwiri<br>or Pukatea? } |                                                                    | <u>Atherospermae</u> 189 |                                                                                                                                                   |
|    |                                |                                                                    | 33                       | Laurelia Novae Zelandiae<br>A. Cunningham                                                                                                         |
| 34 | Puka                           | Kkawa, Waikare,                                                    |                          |                                                                                                                                                   |
| 35 | Heruna                         |                                                                    | <u>Polygonae</u> 211     |                                                                                                                                                   |
| 36 | Pohuehue                       | Dense bushes seashore                                              | 34                       | Polygonum Australe<br>Coccoloba australis Linne 645<br>Endlicher                                                                                  |
| 37 | Tutunahua                      | in pools                                                           | 35                       | P. adpressum<br>Brown                                                                                                                             |
| 38 | Runa?                          |                                                                    | 36                       | P. complexum<br>A Cunningham                                                                                                                      |
| 39 |                                | low situations, Waitangi, Kkeri                                    | 37                       | P. prostratum<br>Richard                                                                                                                          |
|    |                                |                                                                    | 38                       | Rumex crispus<br>Linnaeus                                                                                                                         |
| 40 | Poipapa                        | Greyish, cinereous plants<br>on weather Beaches :—<br>Bay Islands. | 39                       | R. Brownianus<br>valves, much fimbriated<br>Camp                                                                                                  |
|    |                                |                                                                    | <u>Chenopodeae</u> 208   |                                                                                                                                                   |
|    |                                |                                                                    | 40                       | Chenopodium triandrum<br>3 <u>stamens</u> ; <u>leaves</u> cordate-<br>sagittate; <u>spikes</u> terminal, leafless,<br>interrupted. (μ)<br>Forster |

|    |                                                                                   |                                                                       |
|----|-----------------------------------------------------------------------------------|-----------------------------------------------------------------------|
| 41 |                                                                                   | Sandy shores, B. Islands                                              |
| 42 |                                                                                   | Shores; B. Islands                                                    |
| 43 |  | Salt marshes – leaves subulate,<br>semi-cylindrical – flowers sessile |
| 44 |                                                                                   |                                                                       |
| 45 |                                                                                   | rocks washed by sea                                                   |
| 46 | Nahui                                                                             | Procumbent in bogs; B. Islands                                        |
| 47 | Kohukohu                                                                          | Dry banks, among Ferns                                                |
| 48 | Parerarerera                                                                      | Banks, Thames & Kkawa                                                 |
| 49 |                                                                                   | Dry banks, seashore                                                   |

|    |                                            |           |
|----|--------------------------------------------|-----------|
| 41 | Chenopodium Botrys.                        | Willdenow |
| 42 | C. glaucum                                 | Willdenow |
| 43 | C. maritimum                               | Willdenow |
| 44 | C. fruticosum<br>Salsola fruticosa, L. 442 | Schultes. |
| 45 | Salicornia indica                          | Brown     |
|    | <u>Amaranthaceae</u> 207                   |           |
| 46 | Alternanthera denticulata                  | Brown.    |
| 47 | Mniarum biflorum 213                       | Linnaeus  |
|    | <u>Plantaginiae</u> 267                    |           |
| 48 | Plantago major                             | Linnaeus  |
| 49 | P. varia                                   |           |



|    |          |                                                                                                             |  |                            |               |
|----|----------|-------------------------------------------------------------------------------------------------------------|--|----------------------------|---------------|
|    |          |                                                                                                             |  | <u>Primulaceae</u> 274 223 |               |
| 50 |          |                                                                                                             |  | 50 Anagallis arvensis      | Linnaeus      |
| 51 |          |                                                                                                             |  | 51 Samolus littoralis      | R. Cunningham |
|    |          |                                                                                                             |  | <u>Scrophularinae</u> 288  |               |
| 52 | Napuka   | S. Head, Hokianga; Sand hills.<br>6 p. Blue flower: leaf<br>knobbed at apex                                 |  | 52 Veronica speciosa       | R. Cunningham |
| 53 | Koromiko | skirts forests                                                                                              |  | 53 V. salicifolia          | Forster       |
| 54 |          | Racemes subterminal, erect;<br>glabrous-leaved, & leaves nerveless<br>& broader at base than V. salicifolia |  | 54 V. macrocarpa           | Vahl          |
| 55 |          | close woods, hills; B. Islands                                                                              |  | 55 V. ligustrifolia        | A. Cunningham |
| 56 |          | seashore                                                                                                    |  | 56 V. angustifolia         | Richard       |
| 57 |          | leaves linear-lanceolate                                                                                    |  | 57 V. parviflora           | Vahl          |
| 58 |          | Cook's straits. leaves elliptic                                                                             |  | 58 V. elliptica            | Forster       |
| 59 |          | Middle Island. leaves serrate, linear                                                                       |  | 59 V. catarractae          | Forster       |
| 60 | Piriti   | Head of Waikare, falls, Kkeri, –<br>large shrub                                                             |  | 60 V. diosmifolia          | A. Cunningham |

|    |          |                                                                                                                                                          |
|----|----------|----------------------------------------------------------------------------------------------------------------------------------------------------------|
| 61 |          | recumbent; Paihia, Waimate                                                                                                                               |
| 62 |          | bogs, bet: Waimate & Kerikeri                                                                                                                            |
| 63 |          | Rocks washed by sea; Tolaga Bay.<br>See Linné, 941. Didynamia,<br>Angiosp. – leaves wedge ovate<br>toothed at top, lobes of corol slightly<br>emarginate |
| 64 | Waiuatua | In woods; nr. Haumi; Kkeri                                                                                                                               |
| 65 | Kohoho   |                                                                                                                                                          |
| 66 | Poporo   |                                                                                                                                                          |

|    |                          |               |
|----|--------------------------|---------------|
| 61 | Veronica calycina        | Brown         |
| 62 | Gratiola sexdentata      | R. Cunningham |
| 63 | Euphrasia cuneata        | Forster       |
|    | <u>Cyrtandraceae</u> 283 |               |
| 64 | Rhabdothamnus solandri   | A. Cunningham |
|    | <u>Solaneae</u> 293      |               |
| 65 | Solanum laciniatum       | Brown         |
| 66 | S. nigrum?               | W.C.          |

|    |                                              |                                                                                             |
|----|----------------------------------------------|---------------------------------------------------------------------------------------------|
| 67 | Ngaio                                        | see Linné, 992                                                                              |
| 68 |                                              | Middle island;<br>leaves oblong elliptic, serrate<br>pubescent                              |
| 69 | Mànawa<br>(Bark used at Rio<br>for tanning.) | Mud flats – B. Islands. –<br>see Linné, 997                                                 |
| 70 | Puriri                                       |                                                                                             |
| 71 |                                              | Mangungu & Mangamuka<br>Hokianga: small, thyme like<br>Kaitaia, & coast nr. C. M. v. Diemen |

|    |                         |               |
|----|-------------------------|---------------|
|    | <u>Myoporinae</u> 279   |               |
| 67 | Myoporum laetum         | Forster       |
| 68 | M. pubescens            | Forster       |
| 69 | Avicennia tomentosa     | Linnaeus      |
|    | <u>Verbenaceae</u> 277  |               |
| 70 | Vitex littoralis        | A. Cunningham |
|    | <u>Labiatae</u> 275     |               |
| 71 | Micromeria Cunninghamii | Bentham       |

|    |          |                                                                 |
|----|----------|-----------------------------------------------------------------|
| 72 |          | Dry rocky elevated spots, Wangaroa.<br>procumbent: hairy; small |
| 73 |          | among Fern, Hills.<br>see Linné 272                             |
| 74 | Pohuehue | B. Islands: marshy grounds                                      |
| 75 | Panahi   | B. Islands: shores.                                             |
| 76 |          | Kkawa; Banks Hokianga<br>purple                                 |
| 77 |          | Bay Islands; Paihia point                                       |
| 78 |          | Rocks washed by sea: Dy. Bay                                    |
| 79 |          | Rare, bleak summit of loftiest hills<br>Dusky Bay               |

|    |                         |           |
|----|-------------------------|-----------|
|    | <u>Boraginae</u> 274    |           |
| 72 | Anchusa spathlata       | Roëmer    |
| 73 | Myosotis Forsterii      | Endlicher |
|    | <u>Convolvaceae</u> 231 |           |
| 74 | Calystegia Sepium       | Brown     |
| 75 | C. Soldanella           | Roëmer    |
| 76 | Ipomoea pendula         | Forster   |
| 77 | Dichondra repens        | Forster   |
|    | <u>Gentianeae</u> 296   |           |
| 78 | Gentiana Saxosa         | Forster   |
| 79 | Gentiana montana        | Forster   |

|    |            |                                                                                                                                                                                 |
|----|------------|---------------------------------------------------------------------------------------------------------------------------------------------------------------------------------|
| 80 |            | Bogs, Mangamuka; slender plant                                                                                                                                                  |
| 81 | Hangehange | Dry woods; B. Islands                                                                                                                                                           |
| 82 | Kaikuku    | Shaded woods; Wanga. Hokga.<br>creeper from Pateretere<br><i>Periplocea capsularis</i><br>Forst. Linné I. 423 ?                                                                 |
| 83 |            | Tree 25 p. Banks rivers – The<br>Iron wood, Norfolk Island.<br>Leaves elliptic, opp. entire; flowers<br>racemes opposite; without petals.<br>Diand. monog. Linn. No. 35, Linné. |

|    |                                                                                          |               |
|----|------------------------------------------------------------------------------------------|---------------|
| 80 | <i>Sebaea gracilis</i>                                                                   | A. Cunningham |
|    | <u>Loganieae</u> 306                                                                     |               |
| 81 | <i>Geniostoma ligustrifolium</i>                                                         | A. Cunningham |
|    | <u>Apocyneae</u> 299                                                                     |               |
| 82 | <i>Parsonsia heterophylla</i><br>** 2 other creepers resembling<br>this – Kkawa, forest. |               |
|    | <u>Oleineae</u> 307                                                                      |               |
| 83 | <i>Olea apetala</i><br>2 stamens only                                                    | Vahl          |

|    |            |                                             |
|----|------------|---------------------------------------------|
| 84 |            | Shores off Cavalles. Small tree             |
| 85 | Tipau      |                                             |
| 86 |            | Hd. of Waikare R. & Station Hokga.<br>Shrub |
| 87 | Mingi      | small plant, leaves prickly                 |
| 88 | Akipiro    | large shrub; close forests, Kkawa           |
| 89 |            | Fern; hills, B. Islands –                   |
| 90 |            | Summits loftiest, barrenest, mountains      |
| 91 | Kotaratarā | Open heathy spots, shores, B. Islands       |

|    |                         |               |
|----|-------------------------|---------------|
|    | <u>Sapoteae</u> 225     |               |
| 84 | Achras costata          | Endlicher     |
|    | <u>Myrsineae</u> 224    |               |
| 85 | Myrsine Urvilliae       | D’Candolle    |
| 86 | M. divaricata           | A. Cunningham |
|    | <u>Epacrideae</u> 222   |               |
| 87 | Cyathodes acerosa       | Brown         |
| 88 | Leucopogon fasciculatus | A. Cunningham |
| 89 | L. Fraseri              | A. Cunningham |
| 90 | Pentachondra pumila     | Brown         |
| 91 | Epacris pauciflora      | Richard       |

|     |          |                                                            |
|-----|----------|------------------------------------------------------------|
| 92  | Nene     |                                                            |
| 93  |          | Middle Island                                              |
| 94  | Warekohu | open fern grounds; B. Islands.                             |
| 95  |          | Banks Kkeri; on rocks                                      |
| 96  |          | open fern lands.                                           |
| 97  |          | Middle Island                                              |
| 98  |          | pebbly bed of Kkeri river, near falls                      |
| 99  |          | among Ferns, coasts, B. Islands<br>1-petaled; aloft at top |
| 100 |          | Sea coast on rocks, B. Islands                             |

|                          |                         |               |
|--------------------------|-------------------------|---------------|
| 92                       | Dracophyllum latifolium | A. Cunningham |
| 93                       | D. longifolium          | Brown         |
| 94                       | D. Urvillianum          | Richard       |
| 95                       | D. Lessonianum          | Richard       |
| <u>Ericaceae 220</u>     |                         |               |
| 96                       | Gaultheria antipoda     | Richard       |
| 97                       | G. rupestris            | Brown         |
| 98                       | G. fluviatilis          | A. Cunningham |
| 237 <u>Campanulaceae</u> |                         |               |
| 99                       | Wahlenbergia gracilis   | Richard       |
| <u>Lobeliaceae 235</u>   |                         |               |
| 100                      | Lobelia alata           | Brown         |

|     |                                    |                                                          |
|-----|------------------------------------|----------------------------------------------------------|
| 101 | Wakapuru                           | Valley, Wangaroa.                                        |
| 102 | Papapa                             | Shores, Kkeri & Kkawa                                    |
| 103 |                                    | Stagnant water, basins rocks, Kkeri river, near fall.    |
| 104 | Oru                                | Damp woods, Matauri.                                     |
| 105 |                                    | Cook's Straits                                           |
| 106 |                                    | Dusky bay; vide A.C.'s letter Jany./39                   |
| 107 | Remuremu<br>Rekoreko<br>Raumangu } | Saltwater creeks, coast                                  |
|     |                                    | Sea coast near Cavalles: tufted in hinder part of leaves |

|     |                                             |               |
|-----|---------------------------------------------|---------------|
| 101 | Lobelia angulata                            | Forster       |
| 102 | L. littoralis                               | R. Cunningham |
| 103 | L. submersa                                 | R. Cunningham |
| 104 | L. physaloides                              | A. Cunningham |
|     | <u>Stylideae</u> 240                        |               |
| 105 | Stylidium spathulatum                       | Brown         |
| 106 | Forstera sedifolia                          | Willdenow     |
|     | <u>Goodenoviae</u> 241                      |               |
| 107 | Goodenia repens                             | Brown         |
|     | see 242                                     |               |
| 108 | Scaevola Novae Zelandiae<br>peculiar stigma | R. Cunningham |



|     |        |                                   |     |                           |               |
|-----|--------|-----------------------------------|-----|---------------------------|---------------|
|     |        |                                   |     | <u>Compositae</u> 251     |               |
| 109 |        | Fern; hills; B. Islands           | 109 | Scorzonera scapigera      | Solander      |
| 110 |        |                                   | 110 | Sonchus oleraceus         | Forster       |
| 111 |        | Dandeln. Sea coast – calyx smooth | 111 | Picris hieracioides       | Linnaeus      |
| 112 |        | Hills, among Fern– calyx rough    | 112 | P. attenuata              | A. Cunningham |
|     |        |                                   |     | § <u>Vernoniaceae</u> 255 |               |
| 113 |        | Mercury Bay                       | 113 | Shawia paniculata         | Forster       |
|     |        |                                   |     | § <u>Asteroidae</u>       |               |
| 114 | Orooro | Tree; 12p., damp woods, Kkawa, &c | 114 | Solidago arborescens      | Forster       |
| 115 |        | Common Bellis                     | 115 | Lagenophora Forsteri      | A. Cunningham |
| 116 |        | among ferns; pilosus leaved       | 116 | L. lanata                 | A. Cunningham |

|     |          |                                                                                                                                                                                                                                                                         |
|-----|----------|-------------------------------------------------------------------------------------------------------------------------------------------------------------------------------------------------------------------------------------------------------------------------|
| 117 |          | Mossy Rocks; Dusky Bay                                                                                                                                                                                                                                                  |
| 118 |          | large-leaved.                                                                                                                                                                                                                                                           |
| 119 |          | Banks rivers; Bay Islands.                                                                                                                                                                                                                                              |
| 120 |          | Cook's Straits                                                                                                                                                                                                                                                          |
| 121 | Kohiriki |                                                                                                                                                                                                                                                                         |
| 122 |          | 1436. L.                                                                                                                                                                                                                                                                |
| 123 |          | Swampy grounds, B. Islds: – Glen.                                                                                                                                                                                                                                       |
| 124 |          | margins, freshwater streams<br>remindg. me of camomile                                                                                                                                                                                                                  |
| 125 |          | Cook's Straits<br>* <u>calyx</u> , common, imbricate; <u>corolla</u> , compound,<br>tubular; <u>filaments</u> 5, <u>anthers</u> cylindric; <u>seeds</u> feathered,<br>downy; <u>receptacle</u> , chaffy; <u>florets</u> in depressed bundles<br>hermaphrodite, tubular. |
| 126 |          | Sandy ridges, shores, Hokianga                                                                                                                                                                                                                                          |
| 127 |          |                                                                                                                                                                                                                                                                         |
| 128 |          |                                                                                                                                                                                                                                                                         |

|     |                                        |              |               |
|-----|----------------------------------------|--------------|---------------|
| 117 | Aster holosericeus                     | } 1399 Linné | Forster       |
| 118 | A. coriaceus                           |              | Forster       |
| 119 | Haxtonia furfuracea                    |              | A. Cunningham |
| 120 | Vittadenia australis                   |              | Richard       |
|     | § <u>Senecionideae</u> 261             |              |               |
| 121 | Bidens pilosa                          |              | Linnaeus      |
| 122 | Cotula coronopifolia                   |              | Linnaeus      |
| 123 | Myriogyne minuta                       |              | Lessing       |
| 124 | Soliva tenella                         |              | A. Cunningham |
| 125 | Craspedia uniflora*<br>1489 L          |              | Forster       |
| 126 | Cassinia leptophylla                   |              | Brown         |
| 127 | Ozothamnus pinifolia                   |              | Brown         |
| 128 | Helichrysum bellidioides<br>1374 Linné |              | Persoon       |

|     |          |                               |     |                                                                                                                                                   |               |
|-----|----------|-------------------------------|-----|---------------------------------------------------------------------------------------------------------------------------------------------------|---------------|
| 129 | Pukatea  |                               | 129 | Gnaphalium luteoalbum                                                                                                                             | Linnaeus      |
| 130 |          | Bay Islands: among Fern       | 130 | G. simplex                                                                                                                                        | Richard       |
| 131 |          | Hills; near Kkeri Station     | 131 | G. 1364 Linne lanatum<br>Herb. woolly, <u>leaves</u> linear-oblong<br>callous mucronate at tip; <u>corymb</u><br>contracted, <u>stalk</u> simple. | Forster       |
| 132 |          | B. Islands                    | 132 | G. (1369 L.) involucratum<br>Herb. <u>leaves</u> linear-elongated<br>mucronate tomentose underneath, head<br>terminal leafy (μ)                   | Forster       |
| 133 |          | near Kkeri falls              | 133 | G. Keriense                                                                                                                                       | A. Cunningham |
| 134 |          | Dusky Bay p. 1360, Linné      | 134 | G. trinerva                                                                                                                                       | Forster       |
| 135 |          | Dusky Bay 1421 L.             | 135 | Arnica operina                                                                                                                                    | Forster       |
| 136 |          | See “Calea leptophylla”, Les. | 136 | Senecio lautus (1364 1391 Linné)                                                                                                                  | Solander      |
| 137 |          | p. 1347, Linné                | 137 | S. australis 1391. L.                                                                                                                             | Willdenow     |
| 138 |          | do “Artemisia biennis”        | 138 | S. neglectus                                                                                                                                      | Richard       |
|     |          | p. 1358, Linné                | 139 | S. argutus                                                                                                                                        | Richard       |
| 139 |          | Bay Islands                   | 140 | S. quadridentatus                                                                                                                                 | Willdenow     |
| 140 |          | Sea coast; near B. Islands,   | 141 | S. hispidulus                                                                                                                                     | Richard       |
| 141 |          | Among Fern; Wangaroa          | 142 | Brachyglottis repanda                                                                                                                             | Forster       |
| 142 | Pukapuka |                               | 143 | B. rotundifolia                                                                                                                                   | Forster       |
| 143 |          | 1413<br>Linné }               |     |                                                                                                                                                   |               |

|     |                                                    |                                                                                                                                              |     |                        |               |
|-----|----------------------------------------------------|----------------------------------------------------------------------------------------------------------------------------------------------|-----|------------------------|---------------|
| 144 | Rani                                               | Banks rivers; B. Islands                                                                                                                     | 144 | Brachyglottis rani     | R. Cunningham |
|     |                                                    |                                                                                                                                              |     | See Calendula 1476, L. |               |
|     |                                                    |                                                                                                                                              |     | <u>Rubiaceae</u> 243   |               |
| 145 | O. has 1 cell and<br>1 seed                        | Tetrand. monog. see p. 202, Linné                                                                                                            | 145 | Opercularia diphylla   | D'Candolle    |
| 146 | stamens unequal<br>to lobes of corolla             | Shores; B. Islands                                                                                                                           | 146 | O. aspera              | D'Candolle    |
| 147 | Fruit double,<br>Leaves whorled<br>witht. stipules | Damp woods; Kkeri                                                                                                                            | 147 | Galium tenuicaule      | A. Cunningham |
| 148 | stem angular(?)<br>flowers minute                  | Shaded woods; Wangaroa                                                                                                                       | 148 | G. propinquum          | A. Cunningham |
| 149 |                                                    | Banks rivers; B. Islands                                                                                                                     | 149 | Coprosma lucida        | Forster       |
| 150 | Mātā                                               | B. Islands; alluvial ground; fetid<br>calyx 1-leaved, 5-toothed; corolla 5<br>or 6 cleft, stamina 5–7; berry 2-<br>seeded – flowers solitary | 150 | C. foetidissima        | Forster       |
| 151 |                                                    | shaded woods; Wangaroa<br>closely allied to C. foetidissima;<br>flowers less crowded, leaves smaller                                         | 151 | C. propinqua           | A. Cunningham |
| 152 |                                                    | dry woods, Wangaroa: red drupe                                                                                                               | 152 | C. rotundifolia        | A. Cunningham |
| 153 |                                                    | slender shrub; banks, Kkeri, &<br>Kkawa; red berry                                                                                           | 153 | C. gracilis            | A. Cunningham |
| 154 |                                                    | Banks, Kkeri river.                                                                                                                          | 154 | C. rhamnoides          | R. Cunningham |
| 155 |                                                    | Dry woods; Wangaroa                                                                                                                          | 155 | C. divaricata          | A. Cunningham |

|                        |        |                                                                                                                                                  |     |                                 |               |
|------------------------|--------|--------------------------------------------------------------------------------------------------------------------------------------------------|-----|---------------------------------|---------------|
| 156                    |        | Salt marshes: sandy ridges, nr. shore, Hokianga                                                                                                  | 156 | <i>Coprosma acerosa</i>         | A. Cunningham |
| 157                    |        | Cook's Straits                                                                                                                                   | 157 | <i>C. repens</i>                | Richard       |
| 158                    |        | Shaded woods, Waimate, &c                                                                                                                        | 158 | <i>C. spathulata</i>            | A. Cunningham |
| 159                    | Patete | Southward.                                                                                                                                       | 159 | <i>Ronabea australis</i>        | Richard       |
| 160                    |        | Sides fall, & Cavern; Kkeri fall.                                                                                                                | 160 | <i>Nertera depressa</i>         | D'.Candolle   |
| 161                    |        | Dry woods, shores B. Isld's: resembling former, <i>N. depressa</i>                                                                               | 161 | <i>Geophyla dichondraefolia</i> | A. Cunningham |
| <u>Loranthaceae</u> 49 |        |                                                                                                                                                  |     |                                 |               |
| 162                    |        | Parasitical on <i>A. tomentosa</i> , Kkawa. Leaves ovate, very entire: racemes on branches & terminal, berry infr., 1 seeded & calyx 0, petals 4 | 162 | <i>Viscum antarcticum</i>       | Forster       |
| 163                    |        | Trees, banks rivers, B. Islands                                                                                                                  | 163 | <i>V. pubigerum</i>             | A. Cunningham |
| 164                    |        | on Kahikatoa ( <i>L. scoparium</i> ) K.keri                                                                                                      | 164 | <i>V. salicornioides</i>        | A. Cunningham |
| 165                    |        | on <i>Vitex littoralis</i> ; Wangaroa                                                                                                            | 165 | <i>Loranthus tetrapetalus</i>   | Linnaeus      |

|     |                                                  |     | Genus <u>Corneis</u> affine. See 49 |               |
|-----|--------------------------------------------------|-----|-------------------------------------|---------------|
| 166 | Margins dry woods; Bay Islands                   | 166 | <i>Alseuosmia linariifolia</i>      | A. Cunningham |
| 167 | Shaded woods; Wangaroa                           | 167 | <i>A. ligustrifolia</i>             | A. Cunningham |
| 168 | Skirts woods; Bay Islands                        | 168 | <i>A. Banksii</i>                   | A. Cunningham |
| 169 | Dense forests; Wangaroa                          | 169 | <i>A. palaeiformis</i>              | A. Cunningham |
| 170 | Dry woods; Wangaroa                              | 170 | <i>A. atriplicifolia</i>            | A. Cunningham |
| 171 | Shaded woods; bet: B. Islds & Hokga.             | 171 | <i>A. Ilex</i>                      | A. Cunningham |
| 172 | Dry woods; shores; B. Islands                    | 172 | <i>A. quercifolia</i>               | A. Cunningham |
| 173 | Margins dry Woods; Hokianga<br>leaf like Warangi | 173 | <i>A. macrophylla</i>               | A. Cunningham |
|     |                                                  |     | ✂ Umbelliferae 21                   |               |
| 174 | wet grounds, nr. Kerikeri                        | 174 | <i>Hydrocotyle elongata</i>         | A. Cunningham |
| 175 | Damp banks, Hokianga                             | 175 | <i>H. microphylla</i>               | A. Cunningham |
| 176 |                                                  | 176 | <i>H. Novae Zealandiae</i>          | D'Candolle    |

|     |                                                                                                |     |                             |               |
|-----|------------------------------------------------------------------------------------------------|-----|-----------------------------|---------------|
| 177 | Bogs; Waimate & Kkeri                                                                          | 177 | Hydrocotyle dichondraefolia | A. Cunningham |
| 178 |                                                                                                | 178 | H. heteromeria              | D.'Candolle   |
| 179 |                                                                                                | 179 | H. compacta                 | D.'Candolle   |
| 180 | Fol. 7-lobed, serrate, villous                                                                 | 180 | H. moschata                 | Forster       |
| 181 | Low marshy grounds; Wangaroa<br>kidney form, tooth crenate, many<br>together at joint of stalk | 181 | H. Asiatica                 | Linnaeus      |
| 182 | Sea coast, near Wangaroa:<br>Beaches, B. Islands:                                              | 182 | Petroselinum prostratum     | D.'Candolle   |
| 183 | Saltwater creeks, Wangaroa                                                                     | 183 | P. filiforme                | Richard       |
| 184 | Cloudy Bay (see 468, Linnè)                                                                    | 184 | Ligusticum Aciphylla        | Sprengel      |
| 185 | Cloudy Bay 478 Linne                                                                           | 185 | L. Gingidium                | D.'Candolle   |
| 186 | Leaves roundish reinform crenate,<br>calyx 5 parted.                                           | 186 | Peucedanum geniculatum      | Forster       |
| 187 |                                                                                                | 187 | Apium graveolens            | Linnaeus      |
|     |                                                                                                |     | <u>Araliaceae.</u> 25       |               |
| 188 |                                                                                                | 188 | Panax simplex               | Forster       |

|     |                             |                                             |
|-----|-----------------------------|---------------------------------------------|
| 189 | Wauwaupaku                  |                                             |
| 190 | Wauwau                      | range of Tide; coast; B. Isld's.            |
| 191 |                             |                                             |
| 192 | Pate                        | See <u>Scheff. digitata</u> , p. 509, Linné |
| 193 | Horoeaka                    |                                             |
| 194 | See,<br>Escalloniaceae, 27. | Forests, source of Kkawa.                   |
| 195 |                             | Damp woods; East Coast.                     |
| 196 |                             | Margins, shaded forests; B. Islands.        |
| 197 |                             | Dry woods, nr. B. Islands                   |
| 198 | Towai                       | Weinmannia racemosa, Linné, 641             |
| 199 | Makamaka                    | Shaded woods; Hokianga                      |

|     |                          |               |
|-----|--------------------------|---------------|
| 189 | Panax arboreum           | Forster       |
| 190 | Cussonia Lessonii        | Richard       |
| 191 | Polyscias pinnata        | Forster       |
| 192 | Aralia schefflera        | Sprengel      |
| 193 | A. crassifolia           | Solander      |
|     | <u>Saxifragaceae</u> 162 |               |
| 194 | Quintinia serrata (27)   | A. Cunningham |
|     | Cunoniaceae 161          |               |
| 195 | Weinmannia betulina      | A. Cunningham |
| 196 | W. fuchsioides           | A. Cunningham |
| 197 | W. sylvicola             | Forster       |
| 198 | Leiospermum racemosum    | Don           |
| 199 | Ackama rosaefolia        | A. Cunningham |



|     |       |                                     |
|-----|-------|-------------------------------------|
| 200 |       | Middle Island<br>Tetrand. Tetrag.   |
| 201 |       | Islets, B. Islands<br>see Linné 813 |
| 202 |       | sandy beaches<br>see Linné 810      |
| 203 | Kohe  | near Waimate; margins forests       |
| 204 | Māwāi | Tapere; Waikare river               |

|           |                           |                         |               |
|-----------|---------------------------|-------------------------|---------------|
| Houseleek |                           | <u>Crassulaceae</u> 163 |               |
| 200       | Tillaea verticillaris     |                         | D’Candolle    |
|           |                           | <u>Ficoideae</u> 56     |               |
| 201       | Mesembryanthemum australe |                         | Solander      |
|           |                           | Tetragoniaceae 209      |               |
| 202       | Tetragonia expansa        |                         | Solander      |
|           |                           | <u>Passifloreae</u> 67  |               |
| 203       | Passiflora tetrandra      |                         | A. Cunningham |
|           |                           | <u>Cucurbitaceae</u> 57 |               |
| 204       | Sicyos australis          |                         | Endlicher     |

|     |            |                                                                    |     |                           |                        |               |
|-----|------------|--------------------------------------------------------------------|-----|---------------------------|------------------------|---------------|
|     |            |                                                                    |     |                           | suborder of Onagraceae |               |
|     |            |                                                                    |     | 650 Linné                 | <u>Halorageae</u> 37   |               |
| 205 | Toatoa     | open fern grounds; B. Islands.                                     | 205 | Cercodia erecta           |                        | D'Candolle    |
| 206 |            | among fern; B. Islands                                             | 206 | C. alternifolia           |                        | A. Cunningham |
| 207 |            | dry exposed rocky hills; Wangaroa                                  | 207 | C. incana                 |                        | A. Cunningham |
| 208 |            | among fern, hills, shores; B. Islands                              | 208 | Goniocarpus tetragynus    |                        | D'Candolle    |
| 209 | Piripiri   | In bogs; near Kkeri river                                          | 209 | G. citriodorus            |                        | A. Cunningham |
| 210 |            | low boggy grounds; Wangaroa                                        | 210 | G. depressus              |                        | A. Cunningham |
| 211 |            | Bogs, Paihia; Kkeri station                                        | 211 | Myriophyllum propinquum   |                        | A. Cunningham |
|     |            |                                                                    |     |                           | <u>Onagrariae</u> 35   |               |
| 212 | Kohutuhutu | margins woods.                                                     | 212 | Fuchsia excorticata       |                        | Forster       |
| 213 | Totera     | Sands, Matauri off Cavalles;<br>flowering in March                 | 213 | F. procumbens             |                        | R. Cunningham |
| 214 |            | banks Kkeri; dry situations;<br>– also bogs: leaflets opp. regular | 214 | Epilobium nummularifolium |                        | R. Cunningham |
| 215 |            | near Lake; bet. W. & Hokianga<br>Forest.                           | 215 | E. pedunculare            |                        | A. Cunningham |

|     |                                                                                                             |     |                               |               |
|-----|-------------------------------------------------------------------------------------------------------------|-----|-------------------------------|---------------|
| 216 | Sandy places; Middle Island                                                                                 | 216 | <i>Epilobium microphyllum</i> | Richard       |
| 217 | alluvial banks; Waitangi; Motu-o-rangi, &c.                                                                 | 217 | <i>E. rotundifolium</i>       | Forster       |
| 218 | among Fern; dry open spots, Waimate                                                                         | 218 | <i>E. thymifolium</i>         | R. Cunningham |
| 219 | bet.: Waimate & Kkeri stations                                                                              | 219 | <i>E. alsinioides</i>         | A. Cunningham |
| 220 | bogs; banks of Kkawa                                                                                        | 220 | <i>E. nerterioides</i>        | A. Cunningham |
| 221 | woods; near Kkeri falls                                                                                     | 221 | <i>E. atriplicifolium</i>     | A. Cunningham |
| 222 | Banks, Hokianga river                                                                                       | 222 | <i>E. pubens</i>              | A. Cunningham |
| 223 | Shady stations, edges woods, Wangaroa                                                                       | 223 | <i>E. cinarium</i>            | A. Cunningham |
| 224 | Margins woods, Waitangi falls                                                                               | 224 | <i>E. incanum</i>             | A. Cunningham |
| 225 | Margins woods, nr. shore, Wangaroa                                                                          | 225 | <i>E. hirtigerum</i>          | A. Cunningham |
| 226 | woods, Kkeri falls; hd. of Kkawa                                                                            | 226 | <i>E. virgatum</i>            | A. Cunningham |
| 227 | bet. Waitangi & Kkeri rivers<br>leaves oblong toothed obtuse, bottom<br>ones opposite, stem roundish erect. | 227 | <i>E. glabellum</i>           | Forster       |
| 228 | among grass, banks rivers, Wangaroa                                                                         | 228 | <i>E. confertum</i>           | A. Cunningham |
| 229 | Mercury Bay: low wet grounds<br>Wangaroa                                                                    | 229 | <i>E. pallidiflorum</i>       | Solander      |
| 230 |                                                                                                             | 230 | <i>E. junceum</i>             | Solander      |

|     |                      |                                                                                                    |     |                                   |               |
|-----|----------------------|----------------------------------------------------------------------------------------------------|-----|-----------------------------------|---------------|
| 231 |                      | shady places; fern; Waikare river                                                                  | 231 | Epilobium haloragifolium          | A. Cunningham |
| 232 | Kahikatoa            | leaves ovate, mucronate,<br>Hills, &c B. Islands.<br>3-nerved; calycine teeth falls                |     | <u>Myrtaceae</u> 43               |               |
|     | see Linne<br>p. 790  |                                                                                                    | 232 | Leptospermum Scoparium<br>L. Thea | Forster       |
| 233 | Kahikatoa;<br>Rawiri | leaves linear lanceolate, slightly muct.<br>bogs; banks of Kkawa<br>1-nerved; calycine teeth remg. | 233 | L. ericoides                      | Richard       |
| 234 | Aka                  | Forests, B. Islands                                                                                | 234 | Metrosideros buxifolia            | A. Cunningham |
| 235 | Torotoro             | Forests, B. Islands                                                                                | 235 | M. perforata                      | Richard       |
| 236 | Ratà                 | Forests, B. Islands                                                                                | 236 | M. robusta                        | A. Cunningham |
| 237 | Pohutukawa           | Seaside                                                                                            | 237 | M. tomentosa                      | Richard       |
| 238 | Rakapika             | Forests, B. Islands<br>see Linné, p. 792                                                           | 238 | M. florida                        | Smith         |
| 239 |                      | dense forests, Wangaroa; adhering<br>to trunks large trees.<br>Linné. p. 792                       | 239 | M. diffusa                        | Smith         |
| 240 |                      |                                                                                                    | 240 | M. lucida                         | Forst: Rich:  |
| 241 |                      | dense forests, Wangaroa; ahering to<br>trees.                                                      | 241 | M. hypericifolia                  | A. Cunningham |
| 242 |                      | Forests, Wangaroa                                                                                  | 242 | M. salicifolia                    | A. Cunningham |

|     |                |                                                                  |
|-----|----------------|------------------------------------------------------------------|
| 243 | Maire tawake   | Banks rivers                                                     |
| 244 | Ramarama       | Shady woods; B. Islands.                                         |
| 245 | Pirikahu       |                                                                  |
| 246 | Tataramoa      | common<br>see Linné, 823                                         |
| 247 |                | Wangaroa – (fruit, bunch 12 in. long)                            |
| 248 |                | dense woods; Wangaroa                                            |
| 249 | Kowai          | Kkeri: foliolis, 25–41                                           |
| 250 |                | Thames: foliolis, 17–21; leaflets<br>$\frac{3}{4}$ in. in length |
| 251 | Kowaingutukaka | Taranake Isld., Kkeri.                                           |

|                            |                                                  |               |
|----------------------------|--------------------------------------------------|---------------|
| 243                        | Eugenia maire                                    | A. Cunningham |
| 244                        | Myrtus bullata                                   | Solander      |
| <u>Rosaceae</u> 143        |                                                  |               |
| Suborder Sanguisorbeae 148 |                                                  |               |
| 245                        | Acaena sanguisorbae                              | Vahl          |
| 246                        | Rubus australis                                  | Forster       |
| 247                        | R. schmidelioides                                | A. Cunningham |
| 248                        | R. cissioides                                    | A. Cunningham |
| <u>Leguminosae</u> 148     |                                                  |               |
| 249                        | Edwardsia microphylla                            | Salisbury     |
| 250                        | E. grandiflora                                   | Salisbury     |
| 251                        | Clanthus puniceus<br>Lotus arboreus? Linné, 1247 | Solander      |

|     |                |                               |
|-----|----------------|-------------------------------|
| 252 |                | Leaflets jointed; nr. N. Cape |
| 253 | Maukoro        | Kkawa; Waimate                |
| 254 | Piripiriwata   | Mawe, by Lake, small, white   |
| 255 | Tataramoa      | M. Island                     |
| 256 | Kumarahou      | B. Islands                    |
| 257 | Tauhinu        | B. Islands                    |
| 258 | Korokiataranga | Margins woods; B. Islands     |

|     |                                    |               |
|-----|------------------------------------|---------------|
| 252 | Guilandina Bonduc                  | Linnaeus      |
| 253 | Carmichaelia australis             | Brown         |
|     | <u>Rhamneae</u> 107                |               |
| 254 | Carpodetus serratus                | Forster       |
| 255 | Pennantia corymbosa                | Forster       |
| 256 | Pomaderris Kumarahou               | A. Cunningham |
| 257 | P. ericifolia                      | A. Cunningham |
|     | Genus <u>novum Rhamneis</u> affine |               |
| 258 | Corokia buddlaeoides               | A. Cunningham |

|     |          |                                                              |
|-----|----------|--------------------------------------------------------------|
|     |          |                                                              |
| 259 |          | Tree: margins woods, Wangaroa<br>Kaitaia forest, nr. road    |
| 260 | Tupakihi |                                                              |
| 261 | Warangi  | Mr. Kings, on hill; hills, B. Islands<br>3 leaves in a whorl |
| 262 |          | Forests; sources Hokga. river                                |

|     |                                                                    |               |
|-----|--------------------------------------------------------------------|---------------|
|     | Genus novum ordinis manifestae<br>inter Brexiaceas et Celestrineas |               |
| 259 | Ixerba brexioides                                                  | A. Cunningham |
|     | <u>Coriariaeae</u> 141                                             |               |
| 260 | Coriaria sarmentosa                                                | Forster       |
|     | <u>Rutaceae</u> 130                                                |               |
| 261 | Melicope ternata                                                   | Forster       |
| 262 | M. simplex                                                         | A. Cunningham |

|     |                                                  |     |                  |                         |  |
|-----|--------------------------------------------------|-----|------------------|-------------------------|--|
|     |                                                  |     |                  | <u>Oxalideae</u> 140    |  |
| 263 | Yellow; common; B. Islands                       | 263 | Oxalis Urvillei  | A. Cunningham           |  |
| 264 | Flores albi; Kk. fall.                           | 264 | O. catarractae   | A. Cunningham           |  |
| 265 | bogs; Hokianga                                   | 265 | O. propinqua     | A. Cunningham           |  |
| 266 | B. Islands                                       | 266 | O. exilis        | A. Cunningham           |  |
| 267 | Sea Coast, Matauri, Cavalles                     | 267 | O. divergens     | A. Cunningham           |  |
| 268 | among Fern, Shores, B. Islands                   | 268 | O. tenuicaulis   | A. Cunningham           |  |
| 269 | Mawe Lake                                        | 269 | O. laticola      | A. Cunningham           |  |
| 270 | Shores B. Islands – bet. Waimate<br>and Kerikeri | 270 | O. ciliifera     | A. Cunningham           |  |
| 271 | Shores B. Islands                                | 271 | O. crassifolia   | A. Cunningham           |  |
|     |                                                  |     |                  |                         |  |
|     |                                                  |     |                  | <u>Geraniaceae.</u> 187 |  |
| 272 | leaves laciniated.<br>Linné, 1081                | 272 | Geranium pilosum | Forster                 |  |
| 273 |                                                  | 273 | G. retrorsum     | L’Herit.                |  |



|     |          |                                                                            |
|-----|----------|----------------------------------------------------------------------------|
| 274 |          | large leaved                                                               |
| 275 |          | Hills among fern Kkeri, B. Islands<br>“prostrato tetragono foliis ovalis.” |
| 276 | Kohekohe | Damp forests; Banks rivers; B. Islands                                     |
| 277 | Titoki   |                                                                            |
| 278 | Ake      | Dry woods; B. Islands<br>“viscidis, subspathulatis”                        |

|     |                                                  |            |
|-----|--------------------------------------------------|------------|
| 274 | Pelargonium clandestinium                        | L’Herit.   |
|     | <u>Hypericineae</u> 77                           |            |
| 275 | Hypericum pusillum                               | D’Candolle |
|     | <u>Meliaceae</u> 101                             |            |
| 276 | Hartighsea spectabilis<br>see Trichilia s. Linne | Jussieu    |
|     | <u>Sapindaceae.</u>                              |            |
| 277 | Alectryon excelsum                               | Gaertner   |
| 278 | Dodonaea spathulata                              | Smith      |

|     |                    |                                                                   |
|-----|--------------------|-------------------------------------------------------------------|
| 279 | Hohere<br>Ongaonga | large ornamentl. shrub; B. Islands<br>Forest, hd. of Kkawa river. |
| 280 | Wau                | B. Islands                                                        |
| 281 | Hinau              | Forests; B. Islands<br>Linné, 848.                                |
| 282 | Makomako           | margins streams; B. Islands<br>see Linné, 848.                    |
| 283 | Ake                | Salt marshes; Haumi,<br>Linné, 1085                               |

|                                               |                          |               |
|-----------------------------------------------|--------------------------|---------------|
| <u>Bombaceae.</u> 92                          |                          |               |
| 279                                           | Hoheria populnea         | A. Cunningham |
| <u>Tiliaceae</u> 99                           |                          |               |
| 280                                           | Entelia arborescens (99) | Brown         |
| <u>Elaeocarpeae.</u> 97                       |                          |               |
| 281                                           | Elaeocarpus Hinau        | A. Cunningham |
| 282                                           | Friesia racemosa         | A. Cunningham |
| <u>Sterculiaceae.</u> (see Euphorbiaceae 116) |                          |               |
| 283                                           | Plagianthus divaricatus  | Forster       |

|     |          |                                                                                         |                                                      |                                                                                                                                 |               |
|-----|----------|-----------------------------------------------------------------------------------------|------------------------------------------------------|---------------------------------------------------------------------------------------------------------------------------------|---------------|
| 284 |          | Tree 70 pedalis; hd. of Kkawa                                                           | 284                                                  | Plagianthus betulinus                                                                                                           | A. Cunningham |
| 285 |          | 6–8 p. among under., bks. Kkawa                                                         | 285                                                  | P. urticinus                                                                                                                    | A. Cunningham |
|     |          |                                                                                         | Mallow <u>Malvaceae</u> 95                           |                                                                                                                                 |               |
| 286 |          | Hills, nr. Mangamuka; Ngaire, opp. Cavalles my plant from Coast. see Linné p. 409, 1115 | 286                                                  | Hibiscus vesicarius                                                                                                             | Linnaeus      |
|     |          |                                                                                         | <u>Lineae.</u> 89                                    |                                                                                                                                 |               |
| 287 |          | Taranake; bare rocks, B. Islds.                                                         | 287                                                  | Linum monogynum<br><u>calyx</u> acute; <u>leaves</u> linear-lanceolate even; <u>stem</u> round, shrubby, & branched at base (μ) | Forster       |
|     |          |                                                                                         | chickweed <u>Caryophyllaceae.</u> See Alsinaceae 125 |                                                                                                                                 |               |
| 288 | Noténoko | on rocks, sea coast; M. Island                                                          | 288                                                  | Arenaria media                                                                                                                  | Linnaeus      |
| 289 |          | country bet. Waimate & Hokga.                                                           | 289                                                  | Stellaria media                                                                                                                 | Linnaeus      |

|     |          |                                                                                     |
|-----|----------|-------------------------------------------------------------------------------------|
| 290 |          | minute plant, bog, glen;                                                            |
| 291 | Tarata 2 | Matauri, opp. Cavalles:<br>Leathery leaf, downy under                               |
| 292 | 3        | Haumi wood; shores, B. Islds.                                                       |
| 293 |          | Shores, Onawero Bay, Wangaroa<br>myrtle-leaved                                      |
| 294 | Kohuhu 1 | Beach, Ti; banks, Kkawa.                                                            |
| 295 | Karo 4   |                                                                                     |
| 296 |          | Thickets, slopes hills, B. Islands                                                  |
| 297 |          | Dry woods, shores, B. Islands                                                       |
| 298 |          | roots, Dammara, near hd. of Kkawa, in<br>forest, habits, akin to <i>P. reflexum</i> |

|                         |                                               |               |
|-------------------------|-----------------------------------------------|---------------|
| <u>Elatineae.</u> 88    |                                               |               |
| 290                     | Elatine gratioloides                          | A. Cunningham |
| <u>Pittosporeae.</u> 31 |                                               |               |
| 291                     | Pittosporum crassifolium                      | Solander      |
| 292                     | <i>P. umbellatum</i><br>in flower Sept. Kkawa | Solander      |
| 293                     | <i>P. eugeniioides</i>                        | A. Cunningham |
| 294                     | <i>P. tenuifolium</i>                         | Solander      |
| 295                     | <i>P. cornifolium</i>                         | A. Cunningham |
| 296                     | <i>P. reflexum</i>                            | R. Cunningham |
| 297                     | <i>P. pinieoleoides</i>                       | R. Cunningham |
| 298                     | <i>P. radicans</i>                            | R. Cunningham |
|                         | 5 – the one from coast                        |               |
|                         | 6 –                                           |               |
|                         | 7 –                                           |               |

|     |       |                                                                                                                   |     |                                                |                        |                       |
|-----|-------|-------------------------------------------------------------------------------------------------------------------|-----|------------------------------------------------|------------------------|-----------------------|
|     |       |  leaves circinate in vernation    |     |                                                | <u>Droseraceae.</u> 66 |                       |
| 299 |       | Boggy grounds; <u>Kkeri</u> station<br>radicle leaved                                                             | 299 | Drosera propinqua                              |                        | A. Cunningham         |
| 300 |       | foliolis bifidus: in bogs; Kkeri river<br><del>Hills. Kk fall</del><br>common sp.                                 | 300 | D. intermedia<br><del>D. peltata</del> collina |                        | A. Cunningham<br>W.C. |
| 301 |       | among Fern; Missn. Statn. Kerikeri<br>leaves simple, stipulate<br>Beyond oropa, in road to orauta<br>Jany 5/40 WC | 301 | Erpetion spathulata                            |                        | Don                   |
| 302 | Mahoe | Skirts forests; banks streams                                                                                     | 302 | Melicytus ramiflorus                           |                        | Forster               |
| 303 |       | Shady forests, betn. B. Islds. & Hokga.                                                                           | 303 | M. macrophyllus                                |                        | A. Cunningham         |

|     |      |                                                                                                                                                                      |  |     |                                           |            |
|-----|------|----------------------------------------------------------------------------------------------------------------------------------------------------------------------|--|-----|-------------------------------------------|------------|
|     |      |                                                                                                                                                                      |  |     | <u>Cruciferae.</u> 58                     |            |
| 304 |      | shores Thames.                                                                                                                                                       |  | 304 | Nasturtium sylvestre                      | Brown      |
| 305 |      | Banks of running streams                                                                                                                                             |  | 305 | Cardamine debilis                         | Solander   |
| 306 |      | sandy shores, B. Islands, Paihia<br>Linne, 1014                                                                                                                      |  | 306 | Alyssum maritimum                         | D'Candolle |
| 307 |      | shores, B. Islands: Tapere, Waikare<br>Linné, 1019                                                                                                                   |  | 307 | Lepidium oleraceum                        | D'Candolle |
|     |      |                                                                                                                                                                      |  |     | Sisymbrium heterophyllum<br>Linné 1025    | Forster    |
|     |      |                                                                                                                                                                      |  |     | <u>Magnoliaceae</u> (See Winteraceae, 17) |            |
| 308 | Toro | See Linné, 867<br>calyx 3-lobed: petals 6–12, germs<br>clavate. Peduncles axillary<br>crowded 1-flowd., pistils 4–<br>Bark pungent<br>polyandria – (20–1000 stamina) |  | 308 | Drimys axillaris                          | Forster    |
|     |      |                                                                                                                                                                      |  |     | <u>Ranunculaceae</u> 5                    |            |
| 309 |      | Bog, Paihia; channel, Kkawa &<br>Waitangi rivers:                                                                                                                    |  | 309 | Ranunculus rivularis                      | Solander   |
| 310 |      | Haumi; watercourses My. Bay                                                                                                                                          |  | 310 | R. acaulis                                | Solander   |
| 311 |      | watercourses; shores, B. Islds.<br>Linné, 885                                                                                                                        |  | 311 | R. acris                                  | Linnaeus   |

|     |            |                                               |
|-----|------------|-----------------------------------------------|
| 312 |            | Kahio river, Wangaroa                         |
| 313 |            | near Tauraki, Hokga.: Uawai Bay               |
| 314 | Puawānanga | margs. woods; shores, B. Islands<br>Linné 879 |
| 315 |            | thickets, Wangaroa<br>cordate leaved          |
| 316 |            | Cook's straits<br>Linné 878                   |
| 317 | Karaka     |                                               |
| 318 |            | Cook's straits                                |

|                     |                                     |                                 |
|---------------------|-------------------------------------|---------------------------------|
| 312                 | Ranunculus plebeius                 | Brown                           |
| 313                 | R. hirtus                           | Solander                        |
| 314                 | Clematis indivisa                   | <del>Willdenow</del><br>Forster |
| 315                 | small greenish one<br>C. parviflora | A. Cunningham                   |
| 316                 | C. hexasepala                       | A. Cunningham                   |
| Appendix.           |                                     |                                 |
| see Myrsinaceae 224 |                                     |                                 |
| 317                 | Corynocarpus laevigata              | Forster                         |
| 318                 | Griselinia lucida (see 526)         | Forster                         |
|                     | Xylosma orbiculatum                 |                                 |

|     |                             |
|-----|-----------------------------|
| 319 | on rocks; great fall, Kkeri |
|-----|-----------------------------|

| <u>Monocotyledoneae</u> |                            |          |
|-------------------------|----------------------------|----------|
| <u>Musci calyptrati</u> |                            |          |
| 319                     | Sphagnum latifolium        | Hedwig   |
| 320                     | Gymnostomum gracile        | Hooker   |
| 321                     | G. macrocarpum             | Sprengel |
| 322                     | G. leptostomum             | Hooker   |
| 323                     | Polytrichum subulatum      | Sprengel |
| 324                     | P. dendroides              | Sprengel |
| 325                     | P. tenuirostrae            | Hooker   |
| 326                     | Dicranum glaucum           | Brid     |
| 327                     | D. Billardieri             | Brid     |
| 328                     | D. dicarpon                | Sprengel |
| 329                     | Trichostomum perichaetiale | Hooker   |
| 330                     | Leucodon calycinus         | Hooker   |



|     |                                  |          |
|-----|----------------------------------|----------|
| 331 | <i>Zygodon conoideum</i>         | Hooker   |
| 332 | <i>Orthotrichum prorepens</i>    | Hooker   |
| 333 | <i>O. longirostrum</i>           | Hooker   |
| 334 | <i>O. longipes</i>               | Hooker   |
| 335 | <i>O. gracile</i>                | Hooker   |
| 336 | <i>Neckera planifolia</i>        | Hooker   |
| 337 | <i>N. setosa</i>                 | Hooker   |
| 338 | <i>Bartramia pendula</i>         | Hooker   |
| 339 | <i>Codonoblepharum Menziesii</i> | Sprengel |
| 340 | <i>Bryum bartramoides</i>        | Hooker   |
| 341 | <i>B. dichotomum</i>             | Sprengel |
| 342 | <i>Hookeria pennata</i>          | Smith    |
| 343 | <i>H. quadrifaria</i>            | Smith    |
| 344 | <i>H. rotulata</i>               | Sprengel |
| 345 | <i>Leskea sulcata</i>            | Hooker   |

|     |                          |          |
|-----|--------------------------|----------|
| 346 | <i>Leskea ericoides</i>  | Hooker   |
| 347 | <i>L. mollis</i>         | Sprengel |
| 348 | <i>L. concinna</i>       | Hooker   |
| 349 | <i>Hypnum spiniforme</i> | Sprengel |
| 350 | <i>H. spininervium</i>   | Hooker   |
| 351 | <i>H. bifarium</i>       | Hooker   |
| 352 | <i>H. distichum</i>      | Sprengel |
| 353 | <i>H. amoenum</i>        | Sprengel |
| 354 | <i>H. leptorrhynchon</i> | Sprengel |
| 355 | <i>H. aciculare</i>      | Sprengel |
| 356 | <i>H. gratum</i>         | Sprengel |
| 357 | <i>H. comosum</i>        | Sprengel |
| 358 | <i>H. Menziesii</i>      | Hooker   |
| 359 | <i>H. Neckerioides</i>   | Hooker   |
| 360 | <i>H. arbuscula</i>      | Hooker   |

|     |                      |         |
|-----|----------------------|---------|
| 361 | Hypnum flexile       | Swartz  |
| 362 | H. Mongeotianum      | Richard |
| 363 | Racopilum tomentosum | Brid    |

Hepaticae

|     |                          |        |
|-----|--------------------------|--------|
| 364 | Jungermannia scolopendra | Hooker |
| 365 | J. saccata               |        |
| 366 | J. falcata               |        |
| 367 | J. adiantoides           |        |
| 368 | J. conjugata             |        |
| 369 | J. ramosissima           |        |
| 370 | J. gigantea              |        |
| 371 | J. pinnatifolia          |        |
| 372 | J. Billardieri           |        |
| 373 | J. sinuosa               |        |
| 374 | J. coalita               |        |
| 375 | J. squarrosa             |        |
| 376 | J. nobilis               |        |
| 377 | J. glaucescens           |        |

|  |  |                   |  |     |                      |               |  |
|--|--|-------------------|--|-----|----------------------|---------------|--|
|  |  |                   |  | 378 | Jungermannia lanata  |               |  |
|  |  |                   |  | 379 | J. flagellifera      |               |  |
|  |  |                   |  | 380 | J. appendiculata     |               |  |
|  |  |                   |  | 381 | J. tomentella        |               |  |
|  |  |                   |  | 382 | J. pulchella         |               |  |
|  |  |                   |  | 383 | J. pendulina         |               |  |
|  |  |                   |  | 384 | J. microphylla       |               |  |
|  |  |                   |  | 385 | J. clavigera         |               |  |
|  |  |                   |  | 386 | J. palpebrifolia     |               |  |
|  |  |                   |  | 387 | J. Phyllanthus       |               |  |
|  |  |                   |  | 388 | J. flabellata        |               |  |
|  |  |                   |  | 389 | J. Hymenophyllum     |               |  |
|  |  |                   |  | 390 | J. eriocaulae        |               |  |
|  |  |                   |  | 391 | Anthoceros giganteus | Lehm          |  |
|  |  | Marchantia – bog  |  | 392 | Marchantia           | R. Cunningham |  |
|  |  | Fimbriarea – Linn |  |     |                      |               |  |

|     |              |                                        |
|-----|--------------|----------------------------------------|
|     |              |                                        |
| 393 |              | Parasc. on Cyathea – Paihia: Kkeri     |
| 394 |              | closely allied to L. densum; slenderer |
| 395 |              | B. Islands; open fern lands; Wangaroa  |
| 396 |              | Humid forests, Wangaroa                |
| 397 |              | Parast. on Pohutukawa                  |
| 398 |              | In bogs, Kkeri, &c.                    |
| 399 |              | myrtifolium:                           |
| 400 | waewaekoukou | Hills, B. Islands.                     |
| 401 |              |                                        |
|     |              | sides Ravine, Busby’s Glen.            |
|     |              | Nihonui                                |

|     |                        |           |
|-----|------------------------|-----------|
|     | <u>Lycopodiaceae</u>   |           |
| 393 | Tmesipteris Forsterii  | Endlicher |
| 394 | Lycopodium Lessonianum | Richard   |
| 395 | L. densum              | Brown     |
| 396 | L. cernuum             | Linnaeus  |
| 397 | L. Flagellaria         | Hooker    |
| 398 | L. laterale            | Brown     |
| 399 | L. Phlegmaria          | Linnaeus  |
| 400 | L. volubile            | Forster   |
| 401 | L. D’Urvillaei         | Richard   |
|     | <u>Marsiliaceae</u>    |           |

|     |             |                               |
|-----|-------------|-------------------------------|
|     |             |                               |
| 402 |             | Waimate, Taeamai              |
| 403 |             | near Matauri, opp. Cavalles   |
| 404 |             | Uruuruwena Lake (Mawe?)       |
|     |             |                               |
| 405 | waewae kaka | swampy, clayey grounds, Kkawa |
| 406 |             | Humid woods; Kkeri falls      |
| 407 |             |                               |
| 408 |             | Kaitaia wood                  |

|     |                          |               |
|-----|--------------------------|---------------|
|     | <u>Filices</u>           |               |
|     |                          |               |
|     | <u>Ophioglosseae</u>     |               |
| 402 | Botrychium australe      | Brown         |
| 403 | Ophioglossum coriaceum   | A. Cunningham |
| 404 | O. elongatum             | R. Cunningham |
|     |                          |               |
|     | <u>Gleicheniaieae</u>    |               |
| 405 | Gleichenia hecystophylla | A. Cunningham |
| 406 | G. flabellata            | Brown         |
| 407 | G. Hermanii              | Brown         |
| 408 | G. arachnoidea           | A. Cunningham |

|     |            |                             |
|-----|------------|-----------------------------|
| 409 |            | Banks, Kkawa; Cavern, fall. |
| 410 | Mangemange | Glen, Paihia;               |
| 411 |            | Hills, Paihia;              |
| 412 |            | <del>Head of Kkawa</del>    |
| 413 |            | Kahikatea wood, Kkeri       |
| 414 |            | Trunks, living trees        |
| 415 |            | Damp woods, nr. Waimate     |

|     |  |                        |               |
|-----|--|------------------------|---------------|
|     |  | <u>Osmundeae</u>       |               |
| 409 |  | Todea pellucida        | Hooker        |
|     |  | T. superba             | W.C.          |
|     |  | <u>Schizeae</u>        |               |
| 410 |  | Lygodium articulatum   | Richard       |
| 411 |  | Schizaea propinqua     | A. Cunningham |
| 412 |  | S. bifida              | Swartz        |
| 413 |  | S. dichotoma           | Smith         |
|     |  | <u>Polypodeae</u>      |               |
| 414 |  | Grammitis scolopendria | Richard       |
| 415 |  | G. australis           | Brown         |
|     |  | G. ciliata             | W.C.          |
|     |  | <u>Gymnogramma</u>     |               |
|     |  | G. Novae Zelandiae     | W.C.          |



|     |          |                                                                                                                    |                |                       |                   |  |
|-----|----------|--------------------------------------------------------------------------------------------------------------------|----------------|-----------------------|-------------------|--|
|     |          |                                                                                                                    |                |                       | <u>Polypodium</u> |  |
| 416 | Kowaowao | Rocks, Trees, B. Islands<br><br>humid woods, Kkawa.<br><br>shaded forests, Wangaroa<br><br>humid forests, Wangaroa | 416            | Polypodium attenuatum | Brown             |  |
| 417 |          |                                                                                                                    | P. Billardieri | Brown                 |                   |  |
| 418 |          |                                                                                                                    | P. pustulatum  | Sprengel              |                   |  |
| 419 |          |                                                                                                                    | P. tenellum    | Brown                 |                   |  |
| 420 |          |                                                                                                                    | P. grammitidis | Brown                 |                   |  |
|     |          |                                                                                                                    | P. sylvaticum  | W.C.                  |                   |  |
|     |          |                                                                                                                    | P. viscidum    | W.C.                  |                   |  |
|     |          |                                                                                                                    |                | <u>Niphobolus</u>     |                   |  |
| 421 |          | shaded woods, shores, B. Islands                                                                                   | 421            | Niphobolus rupestris  | ]Hooker           |  |
| 422 |          | rocks, trees, B. Islands                                                                                           | 422            | N. bicolor ?          | ]Hooker           |  |
|     |          |                                                                                                                    |                | <u>Lomaria</u>        |                   |  |
| 423 |          | Head of Horotutu river                                                                                             | 423            | Lomaria lanceolata    | Sprengel          |  |
|     |          |                                                                                                                    |                | L. heterophylla       | W.C.              |  |
|     |          |                                                                                                                    |                | L. deflexa            | W.C.              |  |
|     |          |                                                                                                                    |                | L. deltoides          | W.C.              |  |

|     |                                    |  |     |                     |               |
|-----|------------------------------------|--|-----|---------------------|---------------|
|     |                                    |  |     | L. Banksii          | W.C.          |
| 424 | Humid woods; Kkeri falls           |  | 424 | Lomaria discolor    | Willdenow     |
| 425 | shady woods; margins bogs,         |  | 425 | L. procera          | Sprengel      |
| 426 | shaded woods, Wangaroa             |  | 426 | L. filiformis       | A. Cunningham |
| 427 | Limbs & Trunks Trees, woods        |  | 427 | L. propinqua        | A. Cunningham |
| 428 | Hills behind Horotutu              |  | 428 | L. Fraserii         | A. Cunningham |
| 429 | edges, running streams             |  | 429 | L. crenulata        | A. Cunningham |
| 430 | margins, streams                   |  | 430 | L. gigantea         | A. Cunningham |
|     | Large & small fronds on one rachis |  |     | L. polymorpha       | A. Cunningham |
|     |                                    |  |     | L. latifolia        | W.C.          |
|     |                                    |  |     | L. linearis         | W.C.          |
|     |                                    |  |     | L. nigra            | W.C.          |
|     |                                    |  |     | <u>Allantodia</u>   |               |
| 431 | moist woods, shores, B. Islands    |  | 431 | Allantodia tenera ? | Brown         |
|     |                                    |  |     | <u>Asplenium</u>    |               |
| 432 | Trees, &c, shaded woods            |  | 433 | Asplenium falcatum  | Swartz.       |

|     |                  |                                                                                                                            |     |                      |            |
|-----|------------------|----------------------------------------------------------------------------------------------------------------------------|-----|----------------------|------------|
| 433 |                  | leaflets trapezoid acuminate acute doubly serrate, (pinnate)                                                               | 433 | Asplenium polyodon   | Forster    |
| 434 |                  | pinnate, leaflets opposite, oblong-ovate, acuminate, serrulate                                                             | 434 | A. lucidum           | Forster    |
| 435 | Paritu: Parinoko | Dense forests, Wangaroa: Thames pinnate, stipes scaly, leaflets oblong, opposite, acuminate, serrate, outer margin shorter | 435 | A. obliquum          | Forster    |
| 436 |                  |                                                                                                                            | 436 | A. obtusatum         | Forster    |
| 437 |                  | Waitangi Cataract: Puketona                                                                                                | 437 | A. flabellifolium    | Cavanilles |
| 438 |                  | Humid woods; Kkawa                                                                                                         | 438 | A. bulbiferum        | Forster    |
|     |                  |                                                                                                                            |     | A. Forsterianum      | WC         |
|     |                  |                                                                                                                            |     | A. Hookerianum       | W.C.       |
|     |                  |                                                                                                                            |     | A. Colensoi          | Hook. fil  |
|     |                  |                                                                                                                            |     | <u>Caenopteris</u>   |            |
| 439 |                  | parasitical, Trees; B. Islands                                                                                             | 439 | Caenopteris flaccida | Smith      |
|     |                  |                                                                                                                            |     | <u>Doodia</u>        |            |
| 440 |                  | Hills; Paihia, Waitangi                                                                                                    | 440 | Doodia aspera        | ?? Brown   |
| 441 |                  | Hills, with D. aspera                                                                                                      | 441 | D. caudata           | Brown      |

|     |             |                                      |     |                                                                                                                                                                          |               |
|-----|-------------|--------------------------------------|-----|--------------------------------------------------------------------------------------------------------------------------------------------------------------------------|---------------|
| 442 |             | Dry woods; East Coast                | 442 | Doodia Kunthiana                                                                                                                                                         | Hooker        |
| 443 |             | stony slopes, woods, Kkawa           | 443 | <u>Pteris</u>                                                                                                                                                            |               |
| 444 |             | shady, dry banks, Kkeri, nr. station | 444 | Pteris comans                                                                                                                                                            | Forster       |
| 445 | Aruhe: Roi: | hills & plains –                     | 445 | P. esculenta                                                                                                                                                             | Forster       |
| 446 |             | margins woods; Wanga. Harbour        | 446 | P. affinis                                                                                                                                                               | Richard       |
| 447 |             | Dry woods, Wangaroa                  | 447 | P. macilentia                                                                                                                                                            | Richard       |
| 448 |             | Waimate                              | 448 | P. Brunoniana                                                                                                                                                            | Endlicher     |
| 449 |             | Glen, Paihia; Sea coast              | 449 | P. scaberula                                                                                                                                                             | Richard       |
| 450 |             | woods, Paihia                        | 450 | P. tenuis                                                                                                                                                                | A. Cunningham |
| 451 |             | Dry wooded hills, Wangaroa           | 451 | P. microphylla                                                                                                                                                           | A. Cunningham |
|     |             |                                      |     | P. montana                                                                                                                                                               | W.C.          |
|     |             |                                      |     | “ <u>Pt. humilis</u> , Fronds sub-bipinnate, leaflets oblong gashed sub-pinnate, the outmost obsoletely crenate confluent. Forster, N. Zealand.” Miller G. Dict. vol III |               |

|     |          |                                  |
|-----|----------|----------------------------------|
| 452 |          | Dry woods, Sea coast, B. Islands |
| 453 |          | Shores, Bay Islands              |
| 454 |          | Declivities, dry, woody hills    |
| 455 |          | Rocks; Kkeri station             |
| 456 |          | Shores, Bay Islands              |
| 457 | Pikopiko | Dry leafy woods, Tauranga        |
| 458 |          | Hills, Paihia, Kkawa             |
| 459 |          | Damp woods, Kkeri, Waitangi Fall |

|     |                        |           |
|-----|------------------------|-----------|
|     | <u>Adiantum</u>        |           |
| 452 | Adiantum affine        | Brown     |
| 453 | A. formosum            | Brown     |
| 454 | A. hispidulum          | Brown     |
|     | A. falcatum            | W.C.      |
|     | A. assimile            | W.C.      |
|     | <u>Cheilanthes.</u>    |           |
| 455 | Cheilanthes tenuifolia | Brown     |
| 456 | C. ambigua             | Richard   |
|     | C. pellucida           | W.C.      |
|     | <u>Lindsaea</u>        |           |
| 457 | Lindsaea Lessonii      | Richard   |
| 458 | L. linearis            | Brown     |
| 459 | L. trichomenoides      | Willdenow |
|     | L. viridis             | W.C.      |

|     |      |                         |     |                           |                  |  |
|-----|------|-------------------------|-----|---------------------------|------------------|--|
|     |      |                         |     |                           | <u>Loxsoma</u>   |  |
| 460 |      | Kerikeri, Great Fall    | 460 | Loxsoma Cunninghamii      | Brown            |  |
|     |      |                         |     | Davallia Novae Zealandiae | W.C.             |  |
|     |      |                         |     |                           | <u>Dicksonia</u> |  |
| 461 | Weki | woods, Bay Islands      | 461 | Dicksonia squarrosa       | Swartz           |  |
|     |      |                         |     | D. fibrosa                | W.C.             |  |
|     |      |                         |     | D. lanata                 | W.C.             |  |
|     |      |                         |     |                           | <u>Aspidium</u>  |  |
| 462 |      | margins running streams | 462 | Aspidium pennigerum       | Swartz           |  |
| 463 |      | Glen, Haumi             | 463 | A. vestitum               | Willdenow        |  |
| 464 |      |                         | 464 | A. serra                  | Willdenow        |  |
| 465 |      |                         | 465 | A. proliferum             | Brown            |  |
| 466 |      | shores, B. Islands      | 466 | A. hispidum               | Swartz           |  |
| 467 |      |                         | 467 | A. velutinum              | Richard          |  |

|     |                |                                                   |
|-----|----------------|---------------------------------------------------|
| 468 |                | Thames; B. Islands                                |
| 469 |                | Heads of Kkawa & Waikare rivers                   |
| 470 |                | Ravine, Paihia,                                   |
| 471 | Ponga          | woods, B. Islands                                 |
| 472 | Korau: Mamaku. | woods, B. Islands                                 |
| 473 |                | moist, shady woods, B. Islands,<br>climbing Trees |

|     |                       |          |
|-----|-----------------------|----------|
| 468 | Aspidium coriaceum    | Sprengel |
|     | A. Cunninghamianum    | W.C.     |
|     | A. Waikarense         | W.C.     |
|     | A. pulcherrimum       | W.C.     |
|     | <u>Nephrodium</u>     |          |
| 469 | Nephrodium glabellum  | Forster  |
| 470 | N. molle              | Brown    |
|     | <u>Cyathea</u>        |          |
| 471 | Cyathea dealbata      | Swartz   |
| 472 | C. medullaris         | Swartz   |
|     | <u>Trichomenes</u>    |          |
| 473 | Trichomenes reniforme | Forster  |

|     |                                                                                       |
|-----|---------------------------------------------------------------------------------------|
| 474 | wet rocks; falls, Kkeri                                                               |
| 475 |                                                                                       |
| 476 | Dark ravines, woods, B. Islands<br>– Jungermannia parasitical                         |
| 477 | Damp woods, Hokianga                                                                  |
| 478 | woods Waimate; Paihia;                                                                |
| 479 | Damp shady woods, B. Islands                                                          |
| 480 | Trunks decayed trees humid forests<br>B. Islands                                      |
| 481 |                                                                                       |
| 482 | Fallen Timber, B. Islands                                                             |
| 483 | decayed Timber, Humid forests, Wangaroa<br>– Pateretere, nr. Waimate. – stipes wingd. |
| 484 | Dusky Bay – beautiful, Known by<br>secondary segments of fronds pointing<br>one way   |
| 485 |                                                                                       |

|     |                         |               |
|-----|-------------------------|---------------|
| 474 | Trichomenes venosum     | Brown         |
| 475 | T. strictum             | Hooker        |
| 476 | T. elongatum            | A. Cunningham |
| 477 | T. leptophyllum         | A. Cunningham |
|     | <u>Hymenophyllum</u>    |               |
| 478 | Hymenophyllum dilatatum | Hooker        |
| 479 | H. sanguinolentum       | Swartz        |
| 480 | H. scabrum              | Richard       |
| 481 | H. tortuosum            | Hooker        |
| 482 | H. nitens               | Brown         |
| 483 | H. flexuosum            | A. Cunningham |
| 484 | H. secundum             | Hooker        |
| 485 | H. multifidum           | Swartz        |



|     |  |                                   |     |                           |         |
|-----|--|-----------------------------------|-----|---------------------------|---------|
| 486 |  |                                   | 486 | Hymenophyllum semibivalve | Hooker  |
| 487 |  | Trees, wet woods; Kkeri, fall;    | 487 | H. minimum                | Richard |
| 488 |  | wet rocks, Trees, shaded woods.   | 488 | H. Tunbrigdense           | Swartz  |
| 489 |  |                                   | 489 | H. bivalve                | Swartz  |
| 490 |  |                                   | 490 | H. dimissum               | Swartz  |
|     |  |                                   |     | H. imbricatum             | W.C.    |
|     |  |                                   |     | H. atrovirens             | W.C.    |
|     |  |                                   |     | H. Franklinianum          | W.C.    |
|     |  |                                   |     | H. revolutum              | W.C.    |
|     |  |                                   |     | H. pulcherrimum           | W.C.    |
|     |  |                                   |     | H. spathulatum            | W.C.    |
|     |  | on dry exposed banks, nr. Pouarua |     | Nothoclaena distans       |         |
|     |  |                                   |     | H. villosum               | W.C.    |
|     |  |                                   |     | Notholaena?               |         |

|  |  |            |  |     |                      |           |
|--|--|------------|--|-----|----------------------|-----------|
|  |  |            |  |     | <u>Endogenae</u>     |           |
|  |  |            |  |     | <u>Gramineae</u>     |           |
|  |  |            |  | 491 | Agrostis crinita     | Brown     |
|  |  |            |  | 492 | A. ovata             | Brown     |
|  |  |            |  | 493 | A. rigida            | Richard   |
|  |  |            |  | 494 | A. procera           | Richard   |
|  |  |            |  | 495 | A. conspicua         | Willdenow |
|  |  |            |  | 496 | A. aemula            | Brown     |
|  |  |            |  | 497 | A. Billardieri       | Brown     |
|  |  |            |  | 498 | A. Forsteri          | Richard   |
|  |  |            |  | 499 | A. pilosa            | Richard   |
|  |  |            |  | 500 | Phalaris canariensis | Linnaeus  |
|  |  |            |  | 501 | Danthonia pallida    | Brown     |
|  |  |            |  | 502 | Avena Antarctica     | Brown     |
|  |  | Cloudy Bay |  |     |                      |           |

Pennantia corymbosa

Class, XXIII.2: Polygamia Dioecia

Gen. Char.

Hermaph. Flow.—

Calyx, none.

Corolla. Petals, 5, lanceolate, acute, spreading much.

Stam. Filaments, 5, capillary, length of petals; anthers oblong incumbent.

Pist. Germ. sup., bluntly 3-cornered;  
style, none; stigma, flat, peltated, sub-trilobate.

Per. 3-sided, 2 celled.

Seeds. solitary, sub-triquetrous.

Male Flow.

Cal. & Cor. as in Hermaph. Flow.

Stam. Filaments 5, capillary, twice as long as petals; anthers, ovate, incumbent.

Ess. Char.

Cal. none; Cor. 5-petalled; Stam. 5; Per.  
3-sided, 2-celled, with solitary triquetrous Seeds.

(from Miller's Gard. Dicty., vol. III.)

---

Carpodetus serratus

Cal – 5-toothed, subulate, deciduous: pet. 5, ovate, small: fil. 5, subulate, short, (with pet.) inserted in marg. of cal: anth. roundish. Germ, inferior: style, filiform, long: stigma, flatheaded: Berry, dry, globular; marg. of calyx round it like a ring; 5-celled: seeds. few. slightly angular

|     |        |                             |
|-----|--------|-----------------------------|
|     |        |                             |
| 505 | Patiti | Horotutu                    |
| 506 |        | Salt marshes                |
| 507 |        | open Fern lands; B. Islands |
| 508 |        |                             |
| 509 |        |                             |
| 510 | Kakaho |                             |
| 511 | Tuhui  |                             |
| 512 |        |                             |
| 513 | Moa    | sandy shores                |
| 514 | Karetu |                             |

|     |                        |               |
|-----|------------------------|---------------|
| 503 | Bromus australis       | Brown         |
| 504 | Schenodorus littoralis | Palisot       |
| 505 | Triticum scabrum       | Brown         |
| 506 | T. repens              | Linnaeus      |
| 507 | Poa australis          | Brown         |
| 508 | P. imbecilla           | Solander      |
| 509 | P. caespitosa          | Solander      |
| 510 | Arundo australis       | Richard       |
| 511 | Paspalum orbiculare    | Forster       |
| 512 | Rottbocellia uniflora  | A. Cunningham |
| 513 | Spinifex sericeus      | Brown         |
| 514 | Torresia redolens      | Roemer        |

|     |                   |                                    |
|-----|-------------------|------------------------------------|
| 515 |                   | shaded woods, Kkawa; near Torrents |
| 516 |                   |                                    |
| 517 |                   | razor Grass                        |
| 518 |                   | Boggy grounds; B. Islands          |
| 519 |                   | running in sands, with Spinifex s. |
| 520 | Kopoupou          |                                    |
| 521 |                   |                                    |
| 522 |                   | Swamps, B. Islands                 |
| 523 |                   |                                    |
| 524 |                   |                                    |
| 525 | Toetoe (by woods) |                                    |
| 526 |                   |                                    |
| 527 |                   | seed fm. Pakarata wood             |
| 528 |                   |                                    |

| <u>Cyperaceae</u> |                        |           |
|-------------------|------------------------|-----------|
| 515               | Cyperus ustulatus      | Richard   |
| 516               | Fuirena rubigenosa     | Sprengel  |
| 517               | Isolepis nodosa        | Brown     |
| 518               | I. setacea             | Brown     |
| 519               | I. spiralis            | Richard   |
| 520               | Scirpus lacustris      | Brown     |
| 521               | Vauthera australis     | Richard   |
| 522               | Elaeocharis sphacelata | Brown     |
| 523               | E. acicularis          | Brown     |
| 524               | Schoenus imberbis      | Brown     |
| 525               | Lepidosperma elatior   | Brown     |
| 526               | Lampocarya lacera      | Richard   |
| 527               | L. setifolia           | Richard   |
| 528               | L. affinis             | Brogniart |

|     |             |                                                                    |
|-----|-------------|--------------------------------------------------------------------|
| 529 |             | culm 3 ft., small; leaves longer, rough at edge & bristled at tip. |
| 530 | Koukourouri | Banks Torrents; woods.                                             |
| 531 |             |                                                                    |
| 532 |             | Shores, B. Islands.                                                |
| 533 |             |                                                                    |
| 534 |             |                                                                    |
| 535 |             | Bay Islands.                                                       |
| 536 | Oioi        | razor Grass: sandy shore, B. Isld.                                 |
| 537 |             |                                                                    |

|     |                                                                                                                                                             |            |
|-----|-------------------------------------------------------------------------------------------------------------------------------------------------------------|------------|
| 529 | Gahnia procera                                                                                                                                              | Forster    |
|     | <u>glume</u> , 2 valved, irregular; <u>nectary</u> , 2 valved; <u>stigma</u> , dichotomous; <u>stam.</u> 6; panicle spiked; flowers purple, seed brown. (μ) |            |
| 530 | Uncinia australis                                                                                                                                           | Brown      |
| 531 | Carex polystachia                                                                                                                                           | Richard    |
| 532 | C. punctulata                                                                                                                                               | Richard    |
| 533 | C. recurva                                                                                                                                                  | Persoon    |
| 534 | C. geminata                                                                                                                                                 | Willdenow  |
| 535 | Morelotia Gahnaeformis                                                                                                                                      | Gaudichaud |
|     | Carex uncinata? Linne 1538                                                                                                                                  |            |
|     | <u>Restiaceae.</u>                                                                                                                                          |            |
| 536 | Leptocarpus simplex                                                                                                                                         | Brown      |
|     | <u>Junceae.</u>                                                                                                                                             |            |
| 537 | Juncus maritimus                                                                                                                                            | Brown      |

|     |            |                                                                  |
|-----|------------|------------------------------------------------------------------|
| 538 |            |                                                                  |
| 539 |            |                                                                  |
| 540 |            |                                                                  |
| 541 | Kowarawara | Parasitl. on large Trees in forests broad-leaved                 |
| 542 |            | Parasitical, Trees, on banks of rivers – narrow leaved; pilosus. |
| 543 | Nikau      | close forests; inland.                                           |
| 544 | Rengarenga | cliffs; shores; B. Islands.                                      |

|     |                         |               |
|-----|-------------------------|---------------|
| 538 | Juncus effusus          | Linnaeus      |
| 539 | J. filiformis           | Linnaeus      |
| 540 | Luzula picta            | Richard       |
|     | <u>Melanthaceae.</u>    |               |
| 541 | Astelia Banksii         | A. Cunningham |
| 542 | A. Solandrii            | R. Cunningham |
|     | <u>Palmae.</u>          |               |
| 543 | Areca sapida            | Solander      |
|     | <u>Asphodelae.</u>      |               |
| 544 | Arthropodium cirrhatum. | Brown.        |

|     |              |                                                 |
|-----|--------------|-------------------------------------------------|
| 545 | Turutu       | Hills, B. Islands                               |
| 546 |              | Dusky Bay                                       |
| 547 | Ti           | Paihia; Waitangi.                               |
| 548 | Ti (ngahere) | Wai Purioi, nr. Paihia                          |
| 549 | Korari       | Kkawa; Waikare                                  |
| 550 | Kareao       | woods, B. Islands                               |
| 551 |              | Islets, B. Islds.: among Loxsoma at Kkeri fall. |
| 552 |              | shady woods, nr. Kkeri river                    |
| 553 |              | Humid rocky banks, below fall, Kkeri river.     |

|     |                                  |               |
|-----|----------------------------------|---------------|
| 545 | Dianella intermedia              | Endlicher     |
| 546 | Dracaena indivisa                | Forster       |
| 547 | Cordyline australis              | Endlicher     |
| 548 | C. stricta                       | Endlicher     |
| 549 | Phormium tenax                   | Forster       |
|     | <u>Smilacaceae.</u>              |               |
| 550 | Ripogonum parviflorum            |               |
|     | <u>Irideae</u>                   |               |
| 551 | Libertia grandiflora             | A. Cunningham |
| 552 | L. ixioides                      | A. Cunningham |
| 553 | L. micrantha                     | A. Cunningham |
|     | see Ferraria ixioides Linné 1048 |               |



|     |                                                                  |  | <u>Orchideae</u> |                                                |               |
|-----|------------------------------------------------------------------|--|------------------|------------------------------------------------|---------------|
| 554 | Barren Hills; B. Islands.                                        |  | 554              | Thelymitra Forsterii<br>Linné, 1505 see below  | A. Cunningham |
| 555 | Barren Hills, B. Islands                                         |  | 555              | Orthoceras Strictum<br>Linné, 1503             | Brown         |
| 556 | Barren Hills, B. Islands                                         |  | 556              | Microtis Banksii                               | A. Cunningham |
| 557 | among moss, sides of streams,<br>Kkeri river; Wangaroa           |  | 557              | Acianthus rivularis                            | A. Cunningham |
| 558 | Glen, Paihia; shaded woods                                       |  | 558              | Pterostylis Banksii                            | A. Cunningham |
| 559 | Roots of Trees, Rocks, &c., Kkeri<br>Wangaroa                    |  | 559              | Gastrodia sesamoides                           | Brown         |
| 560 | Hills behind Paihia,                                             |  | 560              | Cyrtostylis reniformis                         | W.C.          |
| 561 | Hills behind Paihia: Glen                                        |  | 561              | Pterostylis collina                            | W.C.          |
| 562 | Hills behind Paihia; Kkawa                                       |  | 562              | Caladenia                                      | W.C.          |
| 563 | Paihia, among L. scoparium;<br>& on fallen Trees, woods, Waimate |  | 563              | Acianthus fornicatus                           | A. Cunningham |
| 564 | Epiphyte; Glen, Paihia                                           |  | 564              | Earina mucronata<br>Linne 1515                 | Lindley       |
| 565 | Epiphyte; Glen, Paihia                                           |  | 565              | Dendrobium Cunninghamii                        | Lindley       |
| 566 | Epiphyte; Glen, Paihia                                           |  | 566              | Bolbophyllum pygmaeum                          | Lindley       |
| 567 | Epiphyte; Papakauri fall, Kkeri                                  |  | 567              | Sarcochilus                                    | R. Cunningham |
|     | Ridge Hills, bet. Kkawa & Oue<br>do. do                          |  |                  | Thelymitra grandiflora<br>Thelymitra straminea | W.C.<br>W.C.  |

|     |                    |                                                              |
|-----|--------------------|--------------------------------------------------------------|
|     |                    | common Thel. broad leaved –                                  |
| 568 | Taro               |                                                              |
| 569 | Raupo              | In marshes.                                                  |
| 570 | Kiekie<br>Tawara } | climbing Trees, in woods,                                    |
| 571 |                    | salt creeks & swamps, Wangaroa<br>arrow grass                |
| 572 | Tutunawai?         | stagnant waters, neigh. Kkeri station<br>oval leaf, floating |

|     |                      |               |
|-----|----------------------|---------------|
|     | Thelymitra lineata   | W.C.          |
|     | <u>Aroideae.</u>     |               |
| 568 | Caladium esculentum  | Ventenat      |
|     | <u>Typhaceae.</u>    |               |
| 569 | Typha angustifolia   | Linnaeus      |
|     | <u>Pandaneae.</u>    |               |
| 570 | Freycineta Banksii   | A. Cunningham |
|     | <u>Alismaceae.</u>   |               |
| 571 | Triglochin flaccidum | A. Cunningham |
| 572 | Potamogeton natans   | Linnaeus      |

## Mems: Filices

Trichomanes – sori on a column arising from  
a receptacle }

Hymenophyllum – sori in a valved receptacle

Aspidium – sori under an involucre  
which is umbilicated

Nephrobium – sori under a theca

Polypodium – sori round, no involucre

Grammitis – sori oblong, no involucre

Asplenium – sori diagonal, dehiscing inwardly

Doodia – sori parallel to midrib, sometimes  
continuous, dehiscing inwardly

Adiantum – sori, in dots or lines on margin  
of fronds; involucre membranaceous,  
opening inwardly

Lindsaea – sori in a continuous line, on  
margin; opening inwardly.

Pteris – sori in a contins. marginal line;  
theca from the inflected margin of  
the frondlet, opening inwardly.

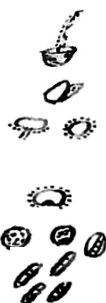


---

(see p. 137, for contn. Mems. Filices.)

### Memorandums of Orchideous Plants

Acianthus rivularis: found by A.C. Esq. in a rocky watercourse, nr. the. old Wesy. Stat. Wangaroa – a single flower, extremities of perianthm. with long filaments – leaf, broad, cordate, – 1½ in high. 1826. Found by W.C. at Kerikeri, below Gt. Fall, – 1838. –

Gastrodia sesamoides: flower forming a tube, divided at the mouth into 5 lobes: Labellum included in the flower: Column large, hollow at the. apex; thickened at the base in front, where the. stigmatic gland exists.  
G. is occasionally epiphytcal on roots of trees: its roots, fleshy, branched & jointed: flower scape without leaves, but furnished with alternate short sheaths: Flowers in racemes whitish or ochre colr. Found by R.C. in the. vicinity of Wangaroa, 1834.

Dendrobium Cunninghamii –

Sarcochilus falcatus

\*\* Mr Brown, in the. appendix to the. Voyage of Flinders, observes – “in the 1st. Voyage of Cook the naturalists who landed in the bays of Tegadoo (Uawa) and Tolago, found several species of Orchideous Epiphytes, comprehended under the Linnean genus, Epidendrium, some of which remain yet unnoticed though collected in the year 1769.”

## Mems: Filices

Their stipes consist of sinuous strata of indurated, compact woody fibre, connected by cellular tissue.

The wood of Tree Ferns (F. with arborescent trunks) is formed by the cohesion of the bases of such stipes round a hollow or cellular axis.

Organs of reproduction are produced from the back or under side of the Frond.

Fronds,  
Frondlets Foliolis } the leaf

Petioles, Stipes,  
Rachis, Peridroma } the leaf stalk

Theca, a cover, or case }  
Capsule, a husk or bag } from the veins of leaves

Conceptacle,

Sori; clusters of theca

Annulus Gyrus, Gyroma, – ring or stalk uniting the  
Theca

Indusium,  
Involucrum, Membranula } a shield, the theca  
Glandulae squamosae, } when from beneath the  
cuticle

Sporules, seeds, which are inflammable

Receptacle, cup as in Hymenophyllum, Trichomanes

Mems: Musci : – or Bryaceae

Mosses have neither vessels nor woody fibre. their stem consists of elongated cellular tissue, from which leaves arise composed in like manner entirely of cellular tissue without woody fibre. Mosses are increased by sporules contained within an urn or theca, placed at the apex of a stalk or seta, having on its summit a loose hood (calyptra) and closed by a lid (operculum). Inside the urn has a central axis (columella), and the space between the columella and sides of the theca are filled with sporules: the orifice beneath the operculum is closed by a fringed membrane (peristomium): the number of teeth in the fringes is always some multiple of 4; from differences in the number, or cohesion of same, the generic characters are formed.

M. Theca, valveless with an operculum

Jungermanniaceae – theca opening by valves. & having  
an operculum

Hepaticae. theca with neither valves nor operculum

### Mems: Hepaticae

Their vegetation is called a frond or thallus; and is either a leafy branched tuft, as in Musci, with the cellular tissue very large; or a sinuous flat mass of green vegetable matter lying upon the ground.

Marchantia – a lobed flat green substance emitting roots from under: organs of reproduction are –  
1st. (Female) a stalked fungilliform receptacle, on its apex a calyptra – underside theca –

2nd. (Male) a stalked receptacle; plane upper surface, with oblong bodies imbedded vertically in its disk, & called Anthers.

3rd. (Viviparous apparatus). little open cups – (cystulae), sessile on the upper surface of the fronds, and containing minute green bodies (gemmae) which have the power of producing new plants –

anthoceros – with cup shaped receptacles

Hep. intermed. bet. Musci & Lichens – differs from Mosses in the want of an operculum

### Mems: Lichens.

Lichens have a lobed Frond or Thallus, the inner substance of which consists wholly of reproductive matter, and breaks through the upper surface in certain forms called fructifications

These forms are 2-fold –

1 – Shields, Apothecia, or Scutella, little cups or lines with a hard disk, surrounded by a rim and containing asci or tubes filled with sporules.

2 – Sorediae, (Globuli, Glomeruli,) – which are heaps of pulverulent bodies scattered over the surface of the Thallus.



Index

|                |     |                |     |
|----------------|-----|----------------|-----|
| Artocarpiae    | 4   | Elaeocarpeae   | 64  |
| Atherospermae  | 10  | Elatineae      | 68  |
| Amaranthaceae  | 12  | Ericaceae      | 26  |
| Apocynae       | 22  |                |     |
| Aroideae       | 130 | Ficoideae      | 46  |
| Alismaceae     | 130 | Flacourtianeae | 70  |
| Asteroideae    | 30  | Filices        | 94  |
| Araliaceae     | 42  |                |     |
| Asphodeleae    | 124 | Gentianeae     | 20  |
| Appendix       | 74  | Goodenoviae    | 28  |
|                |     | Geraniaceae    | 60  |
| Boragineae     | 20  | Gramineae      | 116 |
| Bombaceae      | 64  |                |     |
|                |     | Halorageae     | 48  |
| Coniferae      | 2   | Hypericineae   | 68  |
| Chenopodeae    | 10  | Hepaticae      | 88  |
| Cyrtandraceae  | 16  |                |     |
| Convolvulaceae | 20  | Junceae        | 122 |
| Coriariae      | 58  | Irideae        | 126 |
| Campanulaceae  | 26  |                |     |
| Compositae     | 30  | Laurineae      | 8   |
| Crassulaceae   | 46  | Labiatae       | 18  |
| Cucurbitaceae  | 46  | Loganieae      | 22  |
| Caryophylleae  | 66  | Loranthaceae   | 38  |
| Cruciferae     | 72  | Leguminosae    | 54  |
| Cyperaceae     | 120 | Lineae         | 66  |
|                |     | Lycopodiaceae  | 92  |
| Droseraceae    | 70  |                |     |
|                |     | Moreae         | 6   |
| Euphorbiaceae  | 6   | Myoporinae     | 18  |
| Epacrideae     | 24  | Myrsineae      | 24  |

|                  |     |                  |      |
|------------------|-----|------------------|------|
| Meliaceae        | 62  | Sapoteae         | 24   |
| Malvaceae        | 66  | Stylidiæ         | 28   |
| Magnoliaceae     | 72  | Senecionideae    | 32   |
| Musci calyptrati | 80  | Saxifragaceae    | 44   |
| Myrtaceae        | 50  | Smilacae         | 126  |
| Melanthaceae     | 124 | Sterculiaceae    | 64   |
|                  |     | Sapindaceae      | 62   |
| Oleinae          | 22  |                  |      |
| Oxalideae        | 60  | Thymelae         | 6    |
| Onagrariæ        | 48  | Tiliaceae        | 64   |
| Orchideae        | 128 | Typhaceae        | 130  |
|                  |     |                  |      |
| Peperaceae       | 4   | Urticeae         | 4    |
| Proteaceae       | 8   | Umbelliferae     | 40   |
| Polygoneae       | 10  |                  |      |
| Plantaginiae     | 12  | Verbenaceae      | 18   |
| Primulaceae      | 14  | Vernoniaceae     | 30   |
| Passifloreae     | 46  | Violariæ         | 70   |
| Pittosporeae     | 68  |                  |      |
| Palmae           | 124 |                  |      |
| Pandaneae        | 130 |                  |      |
|                  |     |                  |      |
| Rubiaceae        | 36  | Genus Corneis    | } 40 |
| Restiaceae       | 132 | affine           |      |
| Rosaceae         | 54  |                  |      |
| Rhamneae         | 56  | Genus novum      | } 56 |
| Rutaceae         | 58  | Rhamneis affine  |      |
| Ranunculaceae    | 72  |                  |      |
|                  |     | Genus novum ord- | } 58 |
| Santalaceae      | 6   | inis manifestae  |      |
| Scrophularinae   | 14  | inter Brexiaceas |      |
| Solaneae         | 16  | et Celestrineas  |      |

Forstera sedifolia, snowy mountains  
 Dusky Bay – vide AC's letter Jany. 9/39  
 found on Tongariro by Mr Bidwell /39  
 (see Linné, 1578)

at Waikare, (Jany. 4/41) in bush below the  
 pa – Viscum antarcticum  
 Tree (Norfolk Island, A.C.)  
 &c &c –

Tarangarara - sd. to be a curious plant, by natives.

Papaumu, sd. to be a kind of Karamu (*Coprosma*).

Tutunawai  
Tutunahua } what? where? – 1st. river, hd. of Kkawa

Para, what? sd. to be tuberous, edible, Waikare woods

Kohia, a creeper, what?

An orchid on pohutukawa overhangg. lake rotorua

Biddell in lett.:/39. Alexr. Gray knows

what Trees (sd. to be Manawa?) growg. at Mawe Lake

All Rubiaceous plants have alternate leaves (is not this  
a gross error??)

All *Coprosma* with stipules & opp. leaves.

*Nothoclaena distans*, resembles *Cheilanthes* – abt. to 8  
in in length – woolly underneath

Kumara – *Convolvulus chrysorrhizus* Lind

*Xylosma orbiculare*, *Monoecia Icosandria*, Linné p.  
1630.

Look for *Myosotis spathulata* } either *M. Forsteri* or  
sd. to be a N.Z. plant by Forster } *Anch. spath.*  
see Linné

*Michilia spectabilis*. 681 Linné, what? Hartighsea  
spect.
